# Supplementary material for: H2 oxidation versus organic substrate oxidation in non-heme iron mediated reactions with H2O2
Source: Royal Society of Chemistry journal article supplement (doi:10.1039/c5cc06402c), 2015-01-01
Supplement: c5cc06402c1.pdf [file c5cc06402c1.pdf]

## Supplementary Information

### H<sub>2</sub> Oxidation versus Organic Substrate Oxidation in Non-Heme Iron Mediated Reactions with H<sub>2</sub>O<sub>2</sub>

*Azin Hassanpour,<sup>a</sup> Ferran Acuña-Parés,<sup>b</sup> Josep M. Luis,<sup>b</sup> Olaf Cusso,<sup>b</sup> Silvia Morales de la Rosa,<sup>c</sup> José Miguel Campos-Martín,<sup>c</sup> Jose L.G. Fierro,<sup>c</sup> Miquel Costas,<sup>b,\*</sup> Julio Lloret-Fillol,<sup>b,d\*</sup> and Ruben Mas-Balleste<sup>a,\*</sup>*

---

<sup>a.</sup> *Departamento de Química Inorgánica, Universidad Autónoma de Madrid, 28049 Madrid, Spain; E-mail: ruben.mas@uam.es*

<sup>b.</sup> *Departament de Química, Universitat de Girona, Campus Montilivi, 17071 Girona, Catalonia (Spain), Fax: (+34) 972-41-81-50; E-mail: miquel.costas@udg.edu; julio.lloret@udg.edu*

<sup>c.</sup> *Instituto de Catálisis y Petroleoquímica, CSIC, Marie Curie, s/n, Cantoblanco, 28049 Madrid, Spain*

<sup>d.</sup> *The current address of J. Ll. is: Institute of Chemical Research of Catalonia (ICIQ), Av. Països Catalans 16, 43007 Tarragona, Spain E-mail: jlloret@iciq.es*

**Materials and methods:** All reagents were purchased from Aldrich and used as received unless noted otherwise. High purity deuterium and hydrogen gases were purchased from Linde and Air Liquide respectively. Iron(II) complex  $[(\alpha\text{-BPMCN})\text{Fe}(\text{OTf})_2]$  (BPMCN = N,N'-bis(2-pyridylmethyl)-1,2-diaminocyclohexane, OTF = trifluoromethanesulfonate anion) was synthesized by procedures reported elsewhere.<sup>1</sup>  $\text{CH}_3\text{CN}$  solvent was distilled over  $\text{CaH}_2$  before use. GC product analyses were performed on a CP-3800 Varian gas chromatograph (AT-1701 column, 30 m) with a flame ionization detector. The products were identified by comparison of their GC retention times.  $^2\text{D}$ -NMR spectra were carried out on a Bruker DRX-500 spectrometer on  $\text{CH}_3\text{CN}$  solutions. Natural deuterium content of acetonitrile solvent served as internal standard. Quantification of deuterium content in  $\text{CH}_3\text{CN}$  was determined by calibration with controlled amounts of  $\text{D}_2\text{O}$  (0.1 mM, 1 mM and 10 mM).

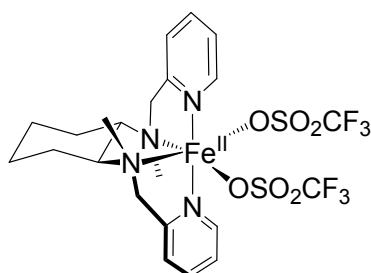

Molecular structure of iron(II) complex  $[\text{Fe}(\text{CF}_3\text{SO}_3)_2(\text{BPMCN})]$

**Reaction conditions for catalytic oxidation of organic substrates at ambient pressure.** In a typical catalysis experiment, a total of 0.29 mL of a 70 mM  $\text{H}_2\text{O}_2$  solution (diluted from a 35%  $\text{H}_2\text{O}_2$  solution) in  $\text{CH}_3\text{CN}$  was delivered by syringe pump over 30 min at 25 °C in air to a  $\text{CH}_3\text{CN}$  solution (2.0 mL) containing iron 1 mM catalyst and 1M organic substrate. In various experiments, acetic acid (1.5 M) was added to the initial solution. The solution was stirred for another 10 min after syringe pump addition was complete.

After this procedure, naphthalene (1mM) as an internal standard was added to the solution. When methyl phenyl sulfide was used as substrate, the solution was passed through a silica column and directly injected to a gas chromatograph.

When cyclohexane or cyclooctene were used as substrate, an additional work up was carried out. Thus, the resulting solutions were treated with acetic anhydride (1 mL) together with 1-methylimidazole (0.1 mL) to esterify the diol or alcohol products.

Organic products were extracted with  $\text{CHCl}_3$  and the solution was subjected to GC analysis. All experiments were run at least in triplicate, the reported data being the average of these reactions.

Catalytic reactions were carried out under an argon or  $\text{H}_2$  atmosphere. For argon atmosphere experiments the solutions containing the iron catalyst and the organic substrate were subjected to three successive freeze-vacuum-argon cycles. Analogously, for  $\text{H}_2$  atmosphere reactions also three successive freeze-vacuum- $\text{H}_2$  cycles were executed to replace air by  $\text{H}_2$ . In addition, catalytic reactions under a  $\text{H}_2$  atmosphere were performed while bubbling a controlled flow of  $\text{H}_2$  ( $200 \text{ cm}^3$  per minute) to the reaction flask.

The possible evaporation caused by the  $\text{H}_2$  flow was analyzed by means of Gas Chromatography measurements that allowed comparing the amount of organic substrate before and after oxidation runs. In all cases the amount detected of substrate indicates that there is no significant loss of reactant during the reaction. The substrate (cyclohexane) is more volatile than the product, and thus is neither expected significant product loss. In fact,  $\text{H}_2$  flow does not imply bubbling and is comparable to Ar flow usual in schlenck systems. Therefore, for experiments in presence of  $\text{H}_2$  we performed a degasification process using  $\text{H}_2$  instead of an inert gas, and later we maintained a positive pressure of  $\text{H}_2$  in a similar way how is done in regular anaerobic experiments.

**Reaction conditions at controlled pressures of  $\text{H}_2$  or  $\text{D}_2$ .** In order to perform catalytic reactions at controlled pressures of  $\text{H}_2$  or  $\text{D}_2$ , a magnetically stirred thermostated teflon-lined steel reactor was used (Berghof BR 100). Injection of  $\text{H}_2\text{O}_2$  under high pressure conditions was achieved by using a 307 Gilson HPLC pump. Tube of the reactor was charged with dry acetonitrile as a solvent, iron complex (1 mM) and cyclohexane (1 M).  $\text{H}_2$  pressure was set to 10, 8, 6 or 4 atmospheres and a solution of 10 equiv  $\text{H}_2\text{O}_2$  (final concentration: 10 mM) was injected over a period of 30 min under pressure and stirring for 30 additional minutes.

Analogous experiments were made by using  $\text{D}_2$  instead of  $\text{H}_2$ , or adding acetic acid (1.5M) to the reaction media.

After finishing the reaction, an esterification work up was carried out and products analyzed by GC.

Alternatively, reactions performed at 10 atm of  $\text{D}_2$ , in absence of cyclohexane were also carried out, and the reaction mixture analyzed directly by  $^2\text{D}$ -NMR without

further treatment. As a control reaction, a reaction was performed at 10 atm of D<sub>2</sub>, in absence of cyclohexane and in absence of iron catalyst. The reaction mixture was also directly analyzed.

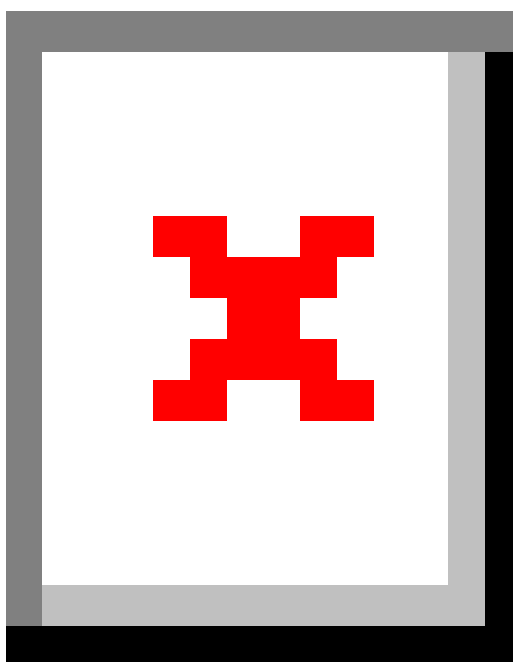

**Figure SI.1.** Replicate of the experiment shown in the main text: Reaction between  $\alpha$ -[Fe(CF<sub>3</sub>SO<sub>3</sub>)<sub>2</sub>(BPMCN)] 1mM in CH<sub>3</sub>CN and 10 equivalents of H<sub>2</sub>O<sub>2</sub>, carried out at 10 atm of D<sub>2</sub>, in absence of cyclohexane. The reaction mixture was analyzed directly by <sup>2</sup>D-NMR without further treatment (top). As a control reaction, a reaction run at 10 atm of D<sub>2</sub>, in absence of cyclohexane and in absence of iron catalyst was performed, and the reaction mixture also directly analyzed (bottom).

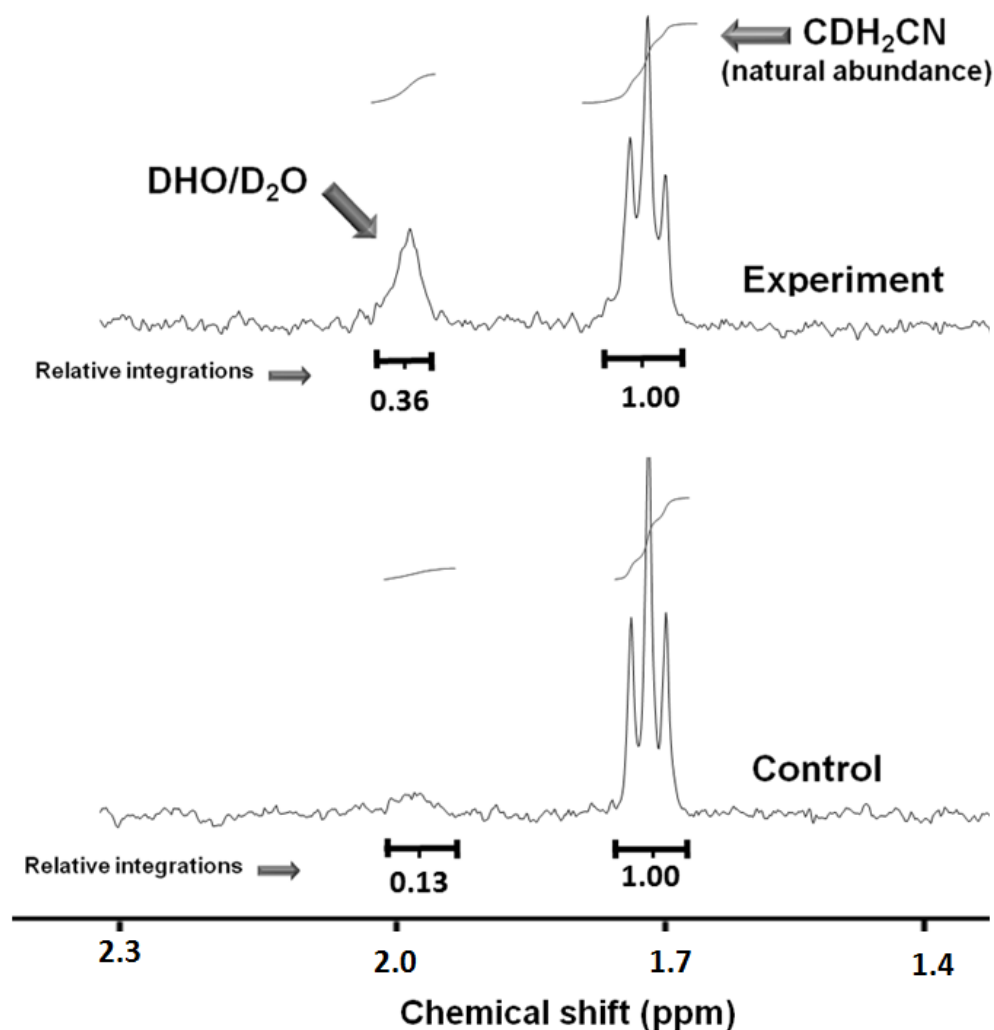

**Figure SI.2.** Reaction between  $\alpha$ -[Fe(CF<sub>3</sub>SO<sub>3</sub>)<sub>2</sub>(BPMCN)] 1mM in CH<sub>3</sub>CN and 100 equivalents of H<sub>2</sub>O<sub>2</sub>, carried out at 10 atm of D<sub>2</sub>, in absence of cyclohexane. The reaction mixture was analyzed directly by <sup>2</sup>D-NMR without further treatment (top). As a control reaction, reaction run at 10 atm of D<sub>2</sub>, in absence of cyclohexane and in absence of iron catalyst was performed, and the reaction mixture also directly analyzed (down).

### Control experiments.

#### *Catalysis in absence of H<sub>2</sub>O<sub>2</sub>.*

In order to check that air does not act as final oxidant, we performed control experiments using cyclohexane as a substrate in absence of H<sub>2</sub>O<sub>2</sub> under an open (air) atmosphere. After 30 min of stirring, the sample was submitted to the workup procedure explained above. In such controls no oxidation products were detected by GC. It is worth to note that all experiments reported in the manuscript are done in absence of air, being degassed the reaction media in all the cases.

### *Catalytic reactions using iron(II) triflate as a catalyst*

In order to check the catalytic activity of free iron cations that could potentially originate from catalyst decomposition, we performed control experiments using cyclohexane as a substrate, H<sub>2</sub>O<sub>2</sub> as oxidant and Fe(OTf)<sub>2</sub> as catalyst, under the reaction conditions used in this work. In pure CH<sub>3</sub>CN, 1.5 TON of cyclohexanone and 0.6 TON of cyclohexanol were detected. In CH<sub>3</sub>CN/CH<sub>3</sub>COOH 10:1, no oxidation products were detected. Thus, it is evident that catalytic results reported herein are not the result of catalyst decomposition.

### *Catalytic reactions at 10 atm of Ar.*

In order to test if there is an effect of the pressure on the catalytic efficiency of the  $\alpha$ -[Fe(CF<sub>3</sub>SO<sub>3</sub>)<sub>2</sub>(BPMCN)]/H<sub>2</sub>O<sub>2</sub> system, control experiments were performed using cyclohexane as a substrate and CH<sub>3</sub>CN as solvent at 10 atm of argon. In such control experiments it is observed that the yield of cyclohexanol is reduced by 40% under 10 atm of Ar in comparison with the yield found at 1 atm of Argon (yields: 58% at 1 atm, 35% at 10 atm). It is worth to note that even though a significant effect of the pressure of an inert gas is observed, the effect of 10 atm of H<sub>2</sub> is the complete quenching of the reaction. Thus, the effect of different H<sub>2</sub> pressures is far beyond the decrease observed by adding pressure of an inert gas. Therefore, these results provide experimental evidence to conclude that H<sub>2</sub> is a competitive substrate.

### **Computational details**

The density functional theory (DFT) study was carried out using the Gaussian09 software package<sup>2</sup> and the B3LYP hybrid exchange-correlation functional.<sup>3</sup> Optimizations were performed with the 6-31G(d,p) basis set for all atoms. Solvent effects were taken into account in geometry optimizations and energies ( $G_{solv}$ , correction) through the SMD polarizable continuum model, with acetonitrile as implicit solvent.<sup>4</sup> Dispersion effects were also introduced with the Grimme-D<sub>2</sub> correction ( $G_{disp}$ ).<sup>5</sup>

The energies were further refined by single-point calculations with the cc-pVTZ dunning basis set for all atoms. All calculations employed the spin-unrestricted formalism and spin-contaminated energies were systematically corrected ( $E_{spin\ corr.}$ ) using the equations described in reference 6.

Thermal plus entropy corrections at 298.15 K were obtained from solvent phase frequency calculations at B3LYP/6-31G(d,p) level ( $G_{corr}$ ). All calculated solvation free energies use a standard state liquid phase concentration of 1 mol·L<sup>-1</sup>, but for acetonitrile itself a 19.1 M standard state was employed. The free energy change associated with moving from a standard-state gas phase pressure of 1 atm to a standard state gas phase concentration of 1 M (19.1 M for acetonitrile) was calculated. The value of  $\Delta G^{o/*}$  at 298.15 K is 1.9 kcal·mol<sup>-1</sup> for 1 M standard state solutes and 3.6 kcal·mol<sup>-1</sup> for 19.1 M standard state acetonitrile.

The final free energy (G) was obtained by adding the previous corrections to the spin corrected potential energy  $E_{spin\ corr.}$ :

$$G = E_{spin\ corr.} + G_{solv.} + G_{corr.} + G_{disp.} + \Delta G^{o/*} \quad (1)$$

The nature of the located stationary points was established by frequency calculations in solvent phase, where transition states have only one imaginary frequency. Finally, the connectivity of all transition states respect to the associated minimums was confirmed through intrinsic reaction coordinate (IRC) calculations.<sup>7</sup>

Labels **I**, **TS** and **II** were used as short nomenclature of reactant complexes, transition states and products involved in the H-H bond breaking event. The **homo** and **heter** notations are related to the homolytic or heterolytic nature of the H-H bond cleavage. Labels **d**, **q** and **sext** are used to specify the doublet, quartet and sextuple spin state of the iron center.

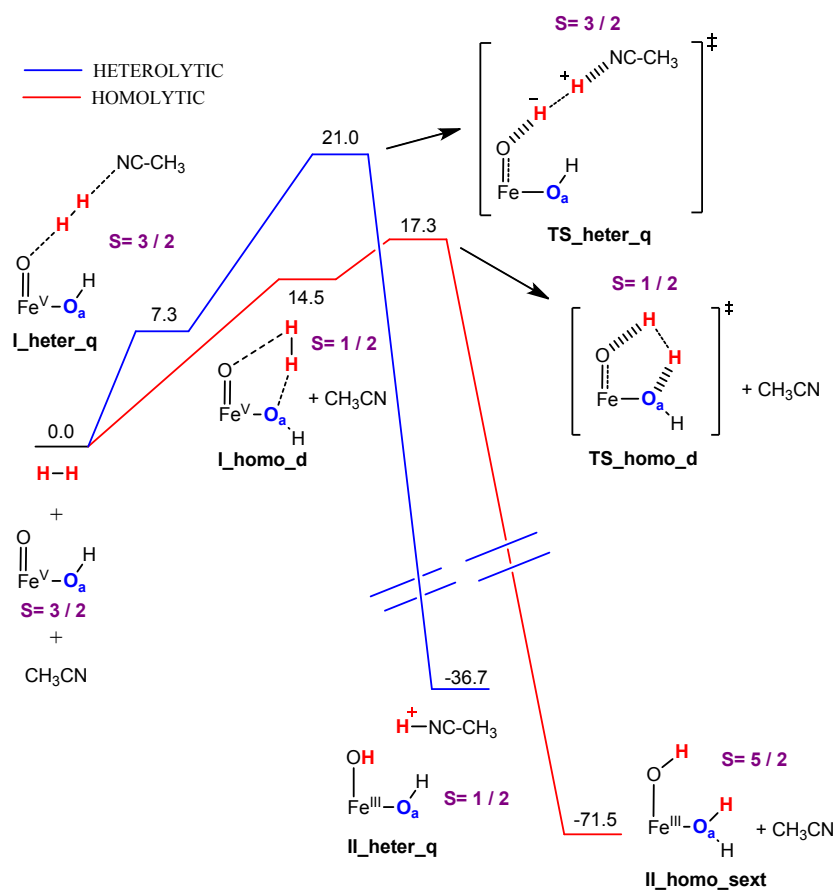

**Figure SI.3.** Homolytic vs heterolytic minimum free energy profiles for the  $\text{H}_2$  oxidation by  $[\text{Fe}^{\text{V}}(\text{O})(\text{OH})(\text{BPMCN})]^{2+}$ . All species are labeled with its ground spin state. Gibbs energy values are given in  $\text{kcal}\cdot\text{mol}^{-1}$ .



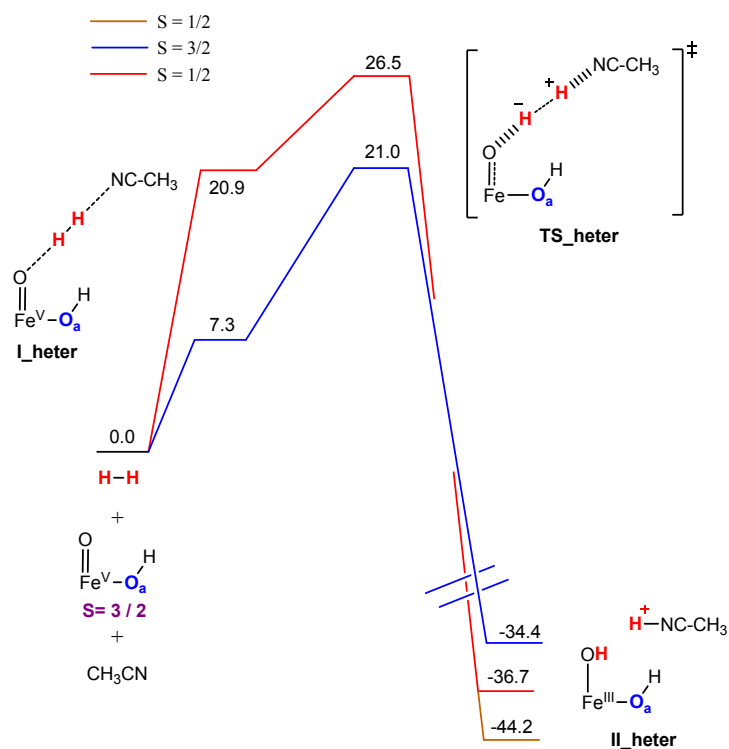

**Figure SI.4.** Heterolytic H<sub>2</sub> oxidation free energy profiles found for [Fe<sup>V</sup>(O)(OH)(BPMCN)]<sup>2+</sup> in the S = 1/2 and 3/2 spin states. Gibbs energy values are given in kcal·mol<sup>-1</sup>.

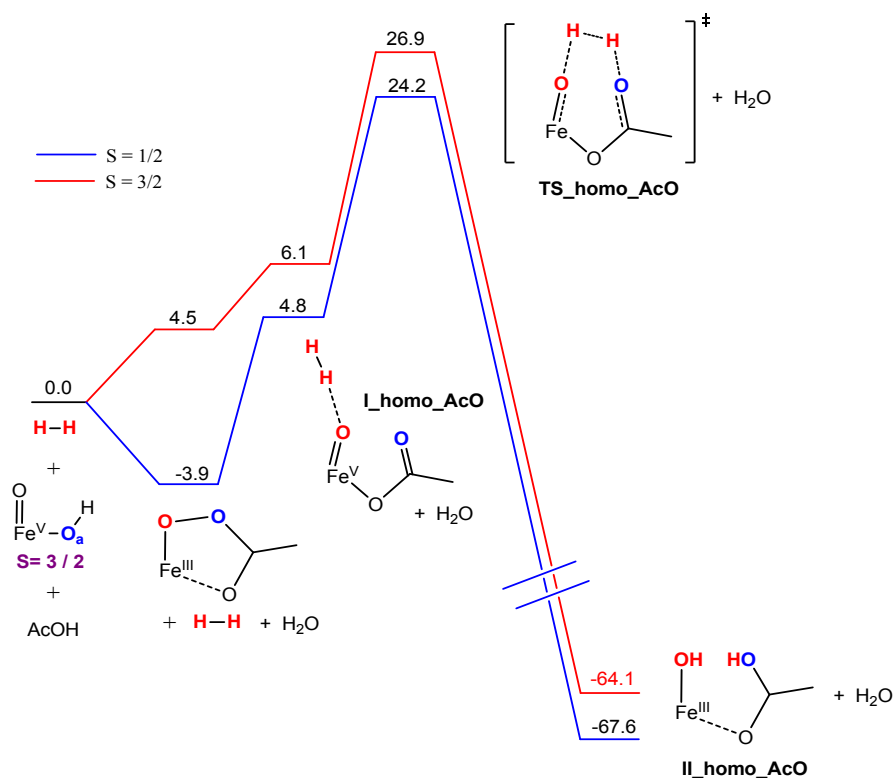

**Figure SI.5.** Homolytic H<sub>2</sub> oxidation free energy profiles found for [Fe<sup>IV</sup>(AcO·)(BPMCN)]<sup>2+</sup> in the S = 1/2 and 3/2 spin states. Gibbs energy values are given in kcal·mol<sup>-1</sup>.

**Table SI.1.** Mulliken atomic spin populations, Fe-O<sub>a</sub> and H<sub>a</sub>-H<sub>b</sub> bond distances for key species involved in the 2+3 homolytic H-H bond activation mechanism for [Fe<sup>V</sup>(O)(OH)(BPMCN)]<sup>2+</sup> active species.

|                                                 | 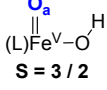 |  |  |  |
|-------------------------------------------------|-----------------------------------------------------------------------------------|-----------------------------------------------------------------------------------|------------------------------------------------------------------------------------|-------------------------------------------------------------------------------------|
|                                                 | S = 3 / 2                                                                         | I_homo_d                                                                          | TS_homo_d                                                                          | II_homo_sext                                                                        |
| ρ(Fe) <sup>a</sup>                              | 2.13                                                                              | 0.77                                                                              | 1.48                                                                               | 4.24                                                                                |
| ρ(O <sub>a</sub> ) <sup>a</sup>                 | 0.85                                                                              | 0.42                                                                              | -0.14                                                                              | 0.31                                                                                |
| ρ(H <sub>a</sub> ) <sup>a</sup>                 | -                                                                                 | 0.00                                                                              | -0.03                                                                              | 0.01                                                                                |
| ρ(H <sub>b</sub> ) <sup>a</sup>                 | -                                                                                 | 0.00                                                                              | -0.14                                                                              | 0.00                                                                                |
| d(Fe-O <sub>a</sub> ) <sup>b</sup>              | 1.64                                                                              | 1.58                                                                              | 1.64                                                                               | 1.81                                                                                |
| d(H <sub>a</sub> -H <sub>b</sub> ) <sup>b</sup> | -                                                                                 | 0.74                                                                              | 0.81                                                                               | 3.01                                                                                |

[a] All values are calculated at the B3LYP(SMD)/6-31G\*\* level in acetonitrile as solvent. [b] Bond distances are in Å.

**Table SI.2.** Mulliken atomic spin populations, Fe-O<sub>a</sub> and H<sub>a</sub>-H<sub>b</sub> bond distances for the S = 1/2 species involved in the 2+3 homolytic H-H bond activation mechanism for complex [Fe<sup>IV</sup>(O)(AcO·)(BPMCN)]<sup>2+</sup>.

|                                                 | 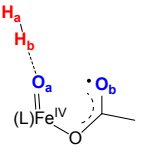 |  |  |
|-------------------------------------------------|-------------------------------------------------------------------------------------|-------------------------------------------------------------------------------------|--------------------------------------------------------------------------------------|
|                                                 | I_homo_AcO_d                                                                        | TS_homo_AcO_d                                                                       | II_homo_AcO_d                                                                        |
| ρ(Fe) <sup>a</sup>                              | 1.58                                                                                | 1.86                                                                                | 0.99                                                                                 |
| ρ(O <sub>a</sub> ) <sup>a</sup>                 | 0.00                                                                                | -0.46                                                                               | 0.09                                                                                 |
| ρ(O <sub>b</sub> ) <sup>a</sup>                 | -0.40                                                                               | -0.05                                                                               | 0.00                                                                                 |
| ρ(H <sub>a</sub> ) <sup>a</sup>                 | 0.00                                                                                | -0.02                                                                               | 0.00                                                                                 |
| ρ(H <sub>b</sub> ) <sup>a</sup>                 | 0.00                                                                                | -0.13                                                                               | 0.00                                                                                 |
| d(Fe-O <sub>a</sub> ) <sup>b</sup>              | 1.63                                                                                | 1.68                                                                                | 1.81                                                                                 |
| d(H <sub>a</sub> -H <sub>b</sub> ) <sup>b</sup> | 0.74                                                                                | 0.78                                                                                | 2.31                                                                                 |

[a] All values are calculated at the B3LYP(SMD)/6-31G\*\* level in acetonitrile as solvent. [b] Bond distances are in Å.

**Table SI.3.** Mulliken atomic spin populations, Fe-O<sub>a</sub> and H<sub>a</sub>-H<sub>b</sub> bond distances for the S = 3/2 species involved in the 2+3 homolytic H-H bond activation mechanism for complex [Fe<sup>IV</sup>(O)(AcO·)(BPMCN)]<sup>2+</sup>.

|                              | 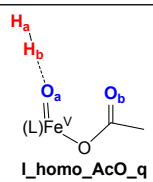 |  |  |
|------------------------------|-----------------------------------------------------------------------------------|-----------------------------------------------------------------------------------|------------------------------------------------------------------------------------|
|                              | I_homo_AcO_q                                                                      | TS_homo_AcO_q                                                                     | II_homo_AcO_q                                                                      |
| $\rho(\text{Fe})^a$          | 2.15                                                                              | 1.84                                                                              | 2.84                                                                               |
| $\rho(\text{O}_a)^a$         | 0.92                                                                              | 0.86                                                                              | 0.06                                                                               |
| $\rho(\text{O}_b)^a$         | 0.06                                                                              | 0.21                                                                              | 0.00                                                                               |
| $\rho(\text{H}_a)^a$         | 0.00                                                                              | 0.04                                                                              | 0.00                                                                               |
| $\rho(\text{H}_b)^a$         | 0.00                                                                              | 0.18                                                                              | 0.00                                                                               |
| $d(\text{Fe}-\text{O}_a)^b$  | 1.64                                                                              | 1.71                                                                              | 1.80                                                                               |
| $d(\text{H}_a-\text{H}_b)^b$ | 0.74                                                                              | 0.81                                                                              | 2.70                                                                               |

[a] All values are calculated at the B3LYP(SMD)/6-31G\*\* level in acetonitrile as solvent. [b] Bond distances are in Å.

**Table SI.4.** Summary of the Mulliken atomic spin populations, for complex  $[\text{Fe}^{\text{V}}(\text{O})(\text{OH})(\text{BPMCNCN})]^{2+}$  ( $S=3/2$ ),  $[\text{Fe}^{\text{V}}(\text{O})(\text{AcO})(\text{BPMCNCN})]^{2+}$  ( $S=3/2$ ) and  $[\text{Fe}^{\text{IV}}(\text{O})(\text{AcO}\cdot)(\text{BPMCNCN})]^{2+}$  ( $S=1/2$ ).

|                                        | 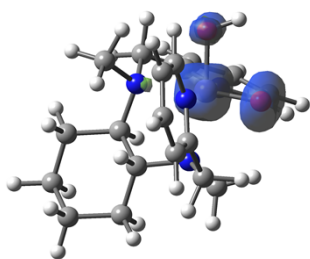 |  |  |
|----------------------------------------|-------------------------------------------------------------------------------------|--------------------------------------------------------------------------------------|---------------------------------------------------------------------------------------|
| $\rho(\text{Fe})^a$                    | 2.13                                                                                | 2.15                                                                                 | 1.58                                                                                  |
| $\rho(\text{O}_{\text{Oxo}})^a$        | 0.85                                                                                | 0.92                                                                                 | 0.00                                                                                  |
| $\rho(\text{O}_b)^a$                   | 0.16                                                                                | 0.06                                                                                 | -0.40                                                                                 |
| $d(\text{Fe}-\text{O}_{\text{oxo}})^b$ | 1.64                                                                                | 1.64                                                                                 | 1.63                                                                                  |

[a] All values are calculated at the B3LYP(SMD)/6-31G\*\* level in acetonitrile as solvent. [b] Bond distances are in Å.

## Cartesian coordinates

In parenthesis are the free energies (in hartrees) and the spin state of each iron intermediate.

### [Fe<sup>V</sup>(O)(OH)(BPMCN)]<sup>2+</sup> (G = -2412.676640) (quartet)

|    |              |              |              |
|----|--------------|--------------|--------------|
| 26 | 0.028550000  | -1.187031000 | -0.034618000 |
| 6  | -2.649450000 | -1.658913000 | 1.162711000  |
| 1  | -2.062738000 | -2.137729000 | 1.935512000  |
| 7  | -1.962026000 | -1.102427000 | 0.147942000  |
| 7  | -0.406316000 | 0.384202000  | -1.340655000 |
| 6  | -4.036415000 | -1.609442000 | 1.200267000  |
| 7  | 0.399113000  | 0.387831000  | 1.344932000  |
| 7  | 2.001236000  | -1.026129000 | -0.205035000 |
| 8  | -0.071348000 | -2.293461000 | -1.234084000 |
| 6  | -4.720510000 | -0.975145000 | 0.162442000  |
| 6  | -3.998173000 | -0.412026000 | -0.889042000 |
| 1  | -4.487094000 | 0.092972000  | -1.714061000 |
| 6  | -2.612860000 | -0.502578000 | -0.874778000 |
| 6  | -1.718542000 | 0.014021000  | -1.955054000 |
| 1  | -1.534718000 | -0.776832000 | -2.688765000 |
| 1  | -2.148131000 | 0.877605000  | -2.468649000 |
| 6  | 0.608890000  | 0.501116000  | -2.423835000 |
| 1  | 0.762146000  | -0.489904000 | -2.849777000 |
| 1  | 1.540801000  | 0.889652000  | -2.016099000 |
| 6  | -0.566601000 | 1.660658000  | -0.531553000 |
| 6  | 0.489357000  | 1.681642000  | 0.562539000  |
| 6  | -0.602985000 | 0.435285000  | 2.441395000  |
| 1  | -0.708453000 | -0.571206000 | 2.845826000  |
| 1  | -1.558619000 | 0.785914000  | 2.052690000  |
| 6  | 1.734641000  | 0.069567000  | 1.923316000  |
| 1  | 1.602973000  | -0.733180000 | 2.654919000  |
| 1  | 2.154240000  | 0.941733000  | 2.431977000  |
| 6  | 2.629886000  | -0.412629000 | 0.825522000  |
| 6  | 4.013574000  | -0.289222000 | 0.845306000  |
| 1  | 4.484970000  | 0.224735000  | 1.675085000  |
| 6  | 4.757148000  | -0.831922000 | -0.201016000 |
| 6  | 4.096774000  | -1.485942000 | -1.243168000 |
| 6  | 2.712950000  | -1.569055000 | -1.213696000 |
| 1  | 2.148288000  | -2.064580000 | -1.992974000 |
| 8  | 0.176070000  | -2.312559000 | 1.332514000  |
| 1  | -5.804020000 | -0.917635000 | 0.172423000  |
| 1  | -4.560068000 | -2.062868000 | 2.033691000  |
| 1  | 5.838845000  | -0.745993000 | -0.203715000 |
| 1  | 4.637479000  | -1.927750000 | -2.071864000 |
| 1  | -0.259541000 | 1.106619000  | 3.233190000  |
| 1  | 0.234545000  | 1.172894000  | -3.200376000 |
| 1  | 0.207044000  | -3.237125000 | 1.026891000  |
| 6  | -0.517958000 | 2.932733000  | -1.387899000 |
| 6  | -0.667298000 | 4.173846000  | -0.497954000 |
| 6  | 0.443003000  | 4.200131000  | 0.559365000  |
| 6  | 0.368614000  | 2.940236000  | 1.431212000  |
| 1  | 1.419910000  | 4.250348000  | 0.060435000  |
| 1  | 0.349704000  | 5.086053000  | 1.196438000  |
| 1  | -0.628035000 | 5.071091000  | -1.124808000 |
| 1  | -1.645647000 | 4.158388000  | 0.000394000  |
| 1  | 0.448049000  | 2.990051000  | -1.898687000 |
| 1  | -1.304286000 | 2.893475000  | -2.147984000 |
| 1  | 1.157209000  | 2.935719000  | 2.190212000  |
| 1  | -0.597317000 | 2.933994000  | 1.945697000  |
| 1  | 1.472576000  | 1.686162000  | 0.083275000  |
| 1  | -1.548493000 | 1.599838000  | -0.055013000 |

### [Fe<sup>V</sup>(O)(OH)(BPMCN)]<sup>2+</sup> (G = -2412.651179) (doublet)

|    |              |              |              |
|----|--------------|--------------|--------------|
| 26 | 0.031626000  | -1.194262000 | -0.057828000 |
| 6  | -2.658088000 | -1.671084000 | 1.167399000  |
| 1  | -2.088605000 | -2.138770000 | 1.959598000  |
| 7  | -1.961414000 | -1.130963000 | 0.149022000  |
| 7  | -0.415432000 | 0.389352000  | -1.329956000 |
| 6  | -4.044207000 | -1.613122000 | 1.210095000  |
| 7  | 0.403061000  | 0.387475000  | 1.329492000  |
| 7  | 2.007343000  | -1.044949000 | -0.203216000 |
| 8  | -0.075045000 | -2.234140000 | -1.291561000 |
| 6  | -4.727159000 | -0.974915000 | 0.174326000  |
| 6  | -4.000717000 | -0.412624000 | -0.874001000 |
| 1  | -4.486110000 | 0.104307000  | -1.693760000 |
| 6  | -2.615890000 | -0.515455000 | -0.862948000 |
| 6  | -1.729922000 | 0.022968000  | -1.940611000 |
| 1  | -1.548077000 | -0.750462000 | -2.693115000 |
| 1  | -2.170257000 | 0.893139000  | -2.433330000 |
| 6  | 0.598766000  | 0.511113000  | -2.416833000 |
| 1  | 0.747429000  | -0.473887000 | -2.857219000 |

|   |              |              |              |
|---|--------------|--------------|--------------|
| 1 | 1.534362000  | 0.889600000  | -2.008475000 |
| 6 | -0.568966000 | 1.667021000  | -0.525662000 |
| 6 | 0.497542000  | 1.682687000  | 0.556565000  |
| 6 | -0.602408000 | 0.438934000  | 2.423800000  |
| 1 | -0.706288000 | -0.564970000 | 2.833216000  |
| 1 | -1.558344000 | 0.786438000  | 2.033259000  |
| 6 | 1.733877000  | 0.064638000  | 1.916589000  |
| 1 | 1.594740000  | -0.727016000 | 2.657894000  |
| 1 | 2.155095000  | 0.939731000  | 2.418880000  |
| 6 | 2.632949000  | -0.430884000 | 0.827580000  |
| 6 | 4.017053000  | -0.309291000 | 0.858262000  |
| 1 | 4.482769000  | 0.205772000  | 1.690610000  |
| 6 | 4.768345000  | -0.853520000 | -0.181398000 |
| 6 | 4.113016000  | -1.503955000 | -1.228431000 |
| 6 | 2.728389000  | -1.583123000 | -1.207714000 |
| 1 | 2.171879000  | -2.073121000 | -1.996410000 |
| 8 | 0.200594000  | -2.280889000 | 1.337261000  |
| 1 | -5.810104000 | -0.908441000 | 0.186939000  |
| 1 | -4.567249000 | -2.058226000 | 2.048318000  |
| 1 | 5.850199000  | -0.769605000 | -0.176253000 |
| 1 | 4.657720000  | -1.944753000 | -2.055119000 |
| 1 | -0.260225000 | 1.115108000  | 3.211945000  |
| 1 | 0.224843000  | 1.194471000  | -3.183188000 |
| 1 | -0.336368000 | -3.087432000 | 1.221510000  |
| 6 | -0.524829000 | 2.939988000  | -1.381350000 |
| 6 | -0.662006000 | 4.179891000  | -0.487870000 |
| 6 | 0.460297000  | 4.201313000  | 0.557018000  |
| 6 | 0.390411000  | 2.940923000  | 1.428378000  |
| 1 | 1.431674000  | 4.248411000  | 0.047079000  |
| 1 | 0.377441000  | 5.086898000  | 1.196021000  |
| 1 | -0.627192000 | 5.078018000  | -1.113702000 |
| 1 | -1.634737000 | 4.166217000  | 0.021402000  |
| 1 | 0.436913000  | 2.996932000  | -1.899894000 |
| 1 | -1.317602000 | 2.904611000  | -2.134895000 |
| 1 | 1.186423000  | 2.932977000  | 2.179537000  |
| 1 | -0.570239000 | 2.938901000  | 1.952463000  |
| 1 | 1.476974000  | 1.683092000  | 0.069646000  |
| 1 | -1.547365000 | 1.607693000  | -0.041580000 |

### I\_heter\_q (G = -2546.634697) (quartet)

|    |              |              |              |
|----|--------------|--------------|--------------|
| 26 | 0.262316000  | -0.997734000 | 0.011107000  |
| 6  | -2.389857000 | -0.335981000 | 1.171861000  |
| 1  | -2.044371000 | -0.979854000 | 1.969665000  |
| 7  | -1.530462000 | -0.125686000 | 0.157640000  |
| 7  | 0.492251000  | 0.568653000  | -1.350115000 |
| 6  | -3.647291000 | 0.251104000  | 1.177480000  |
| 7  | 1.220840000  | 0.348192000  | 1.346798000  |
| 7  | 2.139697000  | -1.636049000 | -0.131207000 |
| 8  | -0.260341000 | -2.015956000 | -1.157040000 |
| 6  | -4.019682000 | 1.067195000  | 0.108637000  |
| 6  | -3.126041000 | 1.267668000  | -0.942006000 |
| 1  | -3.372641000 | 1.892676000  | -1.792602000 |
| 6  | -1.886784000 | 0.644057000  | -0.895106000 |
| 6  | -0.857669000 | 0.723672000  | -1.975303000 |
| 1  | -1.000164000 | -0.105610000 | -2.675152000 |
| 1  | -0.909026000 | 1.664848000  | -2.528154000 |
| 6  | 1.471297000  | 0.235677000  | -2.420897000 |
| 1  | 1.218121000  | -0.747854000 | -2.815712000 |
| 1  | 2.480947000  | 0.234016000  | -2.013698000 |
| 6  | 0.849916000  | 1.833280000  | -0.587425000 |
| 6  | 1.819240000  | 1.473204000  | 0.527577000  |
| 6  | 0.316503000  | 0.824648000  | 2.424960000  |
| 1  | -0.171941000 | -0.045000000 | 2.864459000  |
| 1  | -0.428193000 | 1.502879000  | 2.009682000  |
| 6  | 2.319055000  | -0.452480000 | 1.957567000  |
| 1  | 1.875448000  | -1.114199000 | 2.707141000  |
| 1  | 3.045924000  | 0.199418000  | 2.449844000  |
| 6  | 2.956518000  | -1.284706000 | 0.889890000  |
| 6  | 4.276645000  | -1.715442000 | 0.928516000  |
| 1  | 4.910057000  | -1.400171000 | 1.749789000  |
| 6  | 4.748322000  | -2.544117000 | -0.087967000 |
| 6  | 3.886104000  | -2.921337000 | -1.119767000 |
| 6  | 2.581869000  | -2.450417000 | -1.110678000 |
| 1  | 1.868973000  | -2.709978000 | -1.882609000 |
| 8  | -0.052265000 | -2.041098000 | 1.414606000  |
| 1  | -4.995367000 | 1.540872000  | 0.093958000  |
| 1  | -4.317418000 | 0.063397000  | 2.008087000  |
| 1  | 5.776058000  | -2.891884000 | -0.075749000 |

|   |              |              |              |
|---|--------------|--------------|--------------|
| 1 | 4.211106000  | -3.569697000 | -1.924973000 |
| 1 | 0.894078000  | 1.341183000  | 3.196372000  |
| 1 | 1.396193000  | 0.975541000  | -3.221607000 |
| 1 | -0.374663000 | -2.918376000 | 1.141189000  |
| 6 | 1.410907000  | 2.945946000  | -1.482530000 |
| 6 | 1.761023000  | 4.176493000  | -0.635331000 |
| 6 | 2.778536000  | 3.799881000  | 0.448270000  |
| 6 | 2.200783000  | 2.706312000  | 1.355889000  |
| 1 | 3.701014000  | 3.439781000  | -0.026098000 |
| 1 | 3.037268000  | 4.673789000  | 1.055667000  |
| 1 | 2.161635000  | 4.958963000  | -1.288594000 |
| 1 | 0.852572000  | 4.571098000  | -0.161388000 |
| 1 | 2.323757000  | 2.593618000  | -1.972875000 |
| 1 | 0.681090000  | 3.193956000  | -2.259326000 |
| 1 | 2.916106000  | 2.416930000  | 2.132266000  |
| 1 | 1.307183000  | 3.102785000  | 1.848409000  |
| 1 | 2.727954000  | 1.072418000  | 0.069437000  |
| 1 | -0.078134000 | 2.188252000  | -0.131042000 |
| 1 | -3.524777000 | -1.998895000 | -1.284722000 |
| 1 | -2.787808000 | -2.075269000 | -1.349633000 |
| 7 | -6.077504000 | -1.644025000 | -0.916259000 |
| 6 | -6.628868000 | -0.987954000 | -0.132546000 |
| 6 | -7.313157000 | -0.158063000 | 0.850637000  |
| 1 | -8.195234000 | -0.683614000 | 1.231126000  |
| 1 | -6.635699000 | 0.059645000  | 1.682847000  |
| 1 | -7.627391000 | 0.782420000  | 0.386317000  |

### TS\_heter\_q (G = -2546.612813) (quartet)

|    |              |              |              |
|----|--------------|--------------|--------------|
| 26 | -0.031073000 | -0.854715000 | 0.058343000  |
| 6  | -2.528438000 | 0.173246000  | 1.289491000  |
| 1  | -2.273184000 | -0.541459000 | 2.060514000  |
| 7  | -1.684192000 | 0.245365000  | 0.242749000  |
| 7  | 0.381137000  | 0.660288000  | -1.313755000 |
| 6  | -3.654694000 | 0.981639000  | 1.364597000  |
| 7  | 1.152211000  | 0.291028000  | 1.340665000  |
| 7  | 1.694493000  | -1.802982000 | -0.176914000 |
| 8  | -0.748609000 | -1.856942000 | -1.185292000 |
| 6  | -3.918196000 | 1.877098000  | 0.327618000  |
| 6  | -3.048138000 | 1.935178000  | -0.759837000 |
| 1  | -3.209835000 | 2.615801000  | -1.587784000 |
| 6  | -1.940109000 | 1.098426000  | -0.775959000 |
| 6  | -0.945193000 | 1.036434000  | -1.890128000 |
| 1  | -1.236577000 | 0.257739000  | -2.600137000 |
| 1  | -0.865530000 | 1.987114000  | -2.423098000 |
| 6  | 1.258432000  | 0.186372000  | -2.419387000 |
| 1  | 0.841695000  | -0.746433000 | -2.798062000 |
| 1  | 2.269516000  | 0.027178000  | -2.047156000 |
| 6  | 0.958255000  | 1.845525000  | -0.559232000 |
| 6  | 1.897291000  | 1.322061000  | 0.512988000  |
| 6  | 0.368642000  | 0.893078000  | 2.451074000  |
| 1  | -0.243648000 | 0.109309000  | 2.896639000  |
| 1  | -0.265378000 | 1.691379000  | 2.066042000  |
| 6  | 2.133800000  | -0.678647000 | 1.906946000  |
| 1  | 1.621040000  | -1.265069000 | 2.674431000  |
| 1  | 2.972236000  | -0.150959000 | 2.369373000  |
| 6  | 2.592462000  | -1.595375000 | 0.814832000  |
| 6  | 3.826816000  | -2.232927000 | 0.811959000  |
| 1  | 4.528842000  | -2.029359000 | 1.612440000  |
| 6  | 4.126924000  | -3.118904000 | -0.221696000 |
| 6  | 3.183187000  | -3.342613000 | -1.226140000 |
| 6  | 1.972264000  | -2.667401000 | -1.172674000 |
| 1  | 1.202133000  | -2.798105000 | -1.921691000 |
| 8  | -0.466577000 | -1.865295000 | 1.446312000  |
| 1  | -4.790368000 | 2.521425000  | 0.364994000  |
| 1  | -4.311046000 | 0.897052000  | 2.222320000  |
| 1  | 5.085167000  | -3.627572000 | -0.243779000 |
| 1  | 3.375584000  | -4.025997000 | -2.044913000 |
| 1  | 1.045942000  | 1.296231000  | 3.208629000  |
| 1  | 1.270048000  | 0.931073000  | -3.219245000 |
| 1  | -0.865419000 | -2.701829000 | 1.148614000  |
| 6  | 1.651889000  | 2.869963000  | -1.465232000 |
| 6  | 2.222930000  | 4.017711000  | -0.621265000 |
| 6  | 3.206983000  | 3.469265000  | 0.418334000  |
| 6  | 2.499662000  | 2.465403000  | 1.339516000  |
| 1  | 4.042367000  | 2.975967000  | -0.096122000 |
| 1  | 3.623124000  | 4.281612000  | 1.023564000  |
| 1  | 2.719391000  | 4.736710000  | -1.281610000 |
| 1  | 1.406304000  | 4.544864000  | -0.110300000 |
| 1  | 2.478643000  | 2.386400000  | -1.994450000 |
| 1  | 0.943143000  | 3.242715000  | -2.211384000 |
| 1  | 3.189001000  | 2.054001000  | 2.083312000  |
| 1  | 1.699965000  | 2.989230000  | 1.872247000  |
| 1  | 2.714173000  | 0.787060000  | 0.020266000  |
| 1  | 0.114328000  | 2.335237000  | -0.065531000 |
| 1  | -2.786177000 | -1.477550000 | -1.616451000 |

|   |              |              |              |
|---|--------------|--------------|--------------|
| 1 | -1.879251000 | -1.665387000 | -1.437425000 |
| 7 | -5.082062000 | -0.950201000 | -1.479174000 |
| 6 | -5.382633000 | -1.234359000 | -0.393105000 |
| 6 | -5.748850000 | -1.587269000 | 0.971270000  |
| 1 | -6.508299000 | -2.376257000 | 0.960091000  |
| 1 | -4.862590000 | -1.942868000 | 1.506743000  |
| 1 | -6.146779000 | -0.706653000 | 1.485124000  |

### II\_heter\_q (G = -2546.701201) (quartet)

|    |              |              |              |
|----|--------------|--------------|--------------|
| 26 | -0.221911000 | -0.720236000 | 0.211667000  |
| 6  | -2.795776000 | 0.631195000  | 1.552550000  |
| 1  | -2.480348000 | 0.024068000  | 2.394303000  |
| 7  | -1.984574000 | 0.600069000  | 0.484439000  |
| 7  | -0.000686000 | 0.734175000  | -1.300220000 |
| 6  | -3.962379000 | 1.389760000  | 1.569565000  |
| 7  | 1.120290000  | 0.465704000  | 1.294835000  |
| 7  | 1.738051000  | -1.696135000 | -0.152688000 |
| 8  | -1.119656000 | -1.931371000 | -0.859025000 |
| 6  | -4.285586000 | 2.142054000  | 0.435737000  |
| 6  | -3.439986000 | 2.105678000  | -0.674283000 |
| 1  | -3.654815000 | 2.675951000  | -1.571800000 |
| 6  | -2.297083000 | 1.308873000  | -0.612424000 |
| 6  | -1.354773000 | 1.131410000  | -1.775172000 |
| 1  | -1.737679000 | 0.336854000  | -2.424752000 |
| 1  | -1.299463000 | 2.041068000  | -2.381239000 |
| 6  | 0.768270000  | 0.188045000  | -2.449047000 |
| 1  | 0.334656000  | -0.773972000 | -2.726868000 |
| 1  | 1.805867000  | 0.037532000  | -2.153138000 |
| 6  | 0.679783000  | 1.929460000  | -0.660783000 |
| 6  | 1.742480000  | 1.444532000  | 0.326993000  |
| 6  | 0.415536000  | 1.129613000  | 2.421737000  |
| 1  | -0.172607000 | 0.367908000  | 2.934637000  |
| 1  | -0.247680000 | 1.903332000  | 2.035085000  |
| 6  | 2.160349000  | -0.438271000 | 1.854015000  |
| 1  | 1.690580000  | -1.000082000 | 2.666860000  |
| 1  | 2.994735000  | 0.138553000  | 2.266068000  |
| 6  | 2.633275000  | -1.415541000 | 0.808734000  |
| 6  | 3.883635000  | -2.030239000 | 0.851687000  |
| 1  | 4.588336000  | -1.767664000 | 1.633634000  |
| 6  | 4.193345000  | -2.978797000 | -0.122912000 |
| 6  | 3.249608000  | -3.282412000 | -1.108241000 |
| 6  | 2.028993000  | -2.614405000 | -1.085670000 |
| 1  | 1.250926000  | -2.802008000 | -1.818022000 |
| 8  | -0.593288000 | -1.685978000 | 1.708769000  |
| 1  | -5.183805000 | 2.751549000  | 0.418249000  |
| 1  | -4.597595000 | 1.393508000  | 2.448468000  |
| 1  | 5.159224000  | -3.474563000 | -0.115207000 |
| 1  | 3.454229000  | -4.017366000 | -1.879013000 |
| 1  | 1.131874000  | 1.577509000  | 3.117795000  |
| 1  | 0.724298000  | 0.866101000  | -3.306861000 |
| 1  | -1.204976000 | -2.402756000 | 1.479880000  |
| 6  | 1.271798000  | 2.918418000  | -1.675077000 |
| 6  | 1.948016000  | 4.094958000  | -0.959379000 |
| 6  | 3.045695000  | 3.579964000  | -0.021463000 |
| 6  | 2.443730000  | 2.624167000  | 1.015089000  |
| 1  | 3.809640000  | 3.054527000  | -0.610503000 |
| 1  | 3.539216000  | 4.412983000  | 0.491408000  |
| 1  | 2.363820000  | 4.783082000  | -1.703721000 |
| 1  | 1.202289000  | 4.650430000  | -0.374826000 |
| 1  | 2.025806000  | 2.406475000  | -2.282333000 |
| 1  | 0.484111000  | 3.272119000  | -2.348153000 |
| 1  | 3.215141000  | 2.245644000  | 1.693706000  |
| 1  | 1.714541000  | 3.179846000  | 1.614486000  |
| 1  | 2.493112000  | 0.883720000  | -0.237591000 |
| 1  | -0.095819000 | 2.446128000  | -0.088361000 |
| 1  | -4.519697000 | -0.652655000 | -0.591679000 |
| 1  | -1.339764000 | -1.590392000 | -1.738566000 |
| 7  | -4.127760000 | -1.583037000 | -0.521686000 |
| 6  | -3.582522000 | -2.593124000 | -0.462052000 |
| 6  | -3.112537000 | -3.951364000 | -0.360583000 |
| 1  | -3.979748000 | -4.616466000 | -0.447640000 |
| 1  | -2.386057000 | -4.131865000 | -1.155833000 |
| 1  | -2.629561000 | -4.083445000 | 0.613355000  |

### I\_heter\_d (G = -2546.613035) (doublet)

|    |              |              |              |
|----|--------------|--------------|--------------|
| 26 | 0.255878000  | -0.997574000 | -0.026745000 |
| 6  | -2.417796000 | -0.323800000 | 1.137333000  |
| 1  | -2.095621000 | -0.952317000 | 1.956690000  |
| 7  | -1.543659000 | -0.132473000 | 0.131175000  |
| 7  | 0.504293000  | 0.594966000  | -1.341182000 |
| 6  | -3.670424000 | 0.272322000  | 1.133101000  |
| 7  | 1.219275000  | 0.340307000  | 1.332246000  |
| 7  | 2.125094000  | -1.667855000 | -0.127822000 |

|   |              |              |              |
|---|--------------|--------------|--------------|
| 8 | -0.238444000 | -1.933580000 | -1.247634000 |
| 6 | -4.026366000 | 1.092771000  | 0.062341000  |
| 6 | -3.115122000 | 1.293247000  | -0.972333000 |
| 1 | -3.342368000 | 1.929607000  | -1.819953000 |
| 6 | -1.882048000 | 0.657484000  | -0.913280000 |
| 6 | -0.837818000 | 0.762928000  | -1.978346000 |
| 1 | -0.969169000 | -0.045692000 | -2.704086000 |
| 1 | -0.887333000 | 1.718541000  | -2.505691000 |
| 6 | 1.500019000  | 0.268773000  | -2.401958000 |
| 1 | 1.254564000  | -0.709107000 | -2.814530000 |
| 1 | 2.502487000  | 0.259265000  | -1.977394000 |
| 6 | 0.865183000  | 1.850791000  | -0.571201000 |
| 6 | 1.833208000  | 1.469292000  | 0.536186000  |
| 6 | 0.305523000  | 0.817901000  | 2.403220000  |
| 1 | -0.189119000 | -0.050704000 | 2.836089000  |
| 1 | -0.433181000 | 1.499837000  | 1.983519000  |
| 6 | 2.301571000  | -0.472786000 | 1.954934000  |
| 1 | 1.846765000  | -1.117406000 | 2.711808000  |
| 1 | 3.034783000  | 0.174295000  | 2.444222000  |
| 6 | 2.935196000  | -1.323987000 | 0.899474000  |
| 6 | 4.249859000  | -1.770572000 | 0.958693000  |
| 1 | 4.875654000  | -1.459475000 | 1.787438000  |
| 6 | 4.726812000  | -2.607475000 | -0.048150000 |
| 6 | 3.874873000  | -2.972596000 | -1.092262000 |
| 6 | 2.576804000  | -2.483815000 | -1.101491000 |
| 1 | 1.877090000  | -2.731290000 | -1.889456000 |
| 8 | -0.044033000 | -2.018174000 | 1.395380000  |
| 1 | -4.998895000 | 1.572721000  | 0.037694000  |
| 1 | -4.347925000 | 0.091427000  | 1.959044000  |
| 1 | 5.749855000  | -2.968027000 | -0.020470000 |
| 1 | 4.203389000  | -3.623410000 | -1.894131000 |
| 1 | 0.878752000  | 1.330764000  | 3.180163000  |
| 1 | 1.440375000  | 1.019357000  | -3.193740000 |
| 1 | -0.870779000 | -2.527195000 | 1.297458000  |
| 6 | 1.430808000  | 2.971956000  | -1.453449000 |
| 6 | 1.788894000  | 4.188590000  | -0.589967000 |
| 6 | 2.807652000  | 3.790712000  | 0.484879000  |
| 6 | 2.224752000  | 2.689395000  | 1.380171000  |
| 1 | 3.725860000  | 3.430621000  | 0.002244000  |
| 1 | 3.074591000  | 4.654567000  | 1.103000000  |
| 1 | 2.191893000  | 4.978100000  | -1.233188000 |
| 1 | 0.884023000  | 4.581255000  | -0.107615000 |
| 1 | 2.341907000  | 2.622738000  | -1.948858000 |
| 1 | 0.701998000  | 3.234690000  | -2.226384000 |
| 1 | 2.939491000  | 2.385594000  | 2.151579000  |
| 1 | 1.335365000  | 3.087118000  | 1.878898000  |
| 1 | 2.739564000  | 1.066427000  | 0.075140000  |
| 1 | -0.061497000 | 2.205222000  | -0.111774000 |
| 1 | -3.528000000 | -2.032087000 | -1.283351000 |
| 1 | -2.795520000 | -2.092986000 | -1.397103000 |
| 7 | -6.045773000 | -1.748531000 | -0.783990000 |
| 6 | -6.613943000 | -1.034016000 | -0.066154000 |
| 6 | -7.321648000 | -0.132850000 | 0.834087000  |
| 1 | -6.665844000 | 0.146917000  | 1.665120000  |
| 1 | -7.622820000 | 0.769971000  | 0.292776000  |
| 1 | -8.213888000 | -0.628867000 | 1.230292000  |

**TS\_heter\_d (G = -2546.604166) (doublet)**

|    |              |              |              |
|----|--------------|--------------|--------------|
| 26 | -0.029864000 | -0.855953000 | 0.055900000  |
| 6  | -2.534559000 | 0.165270000  | 1.280690000  |
| 1  | -2.283849000 | -0.554465000 | 2.048657000  |
| 7  | -1.689808000 | 0.238177000  | 0.235137000  |
| 7  | 0.382827000  | 0.661105000  | -1.315050000 |
| 6  | -3.656158000 | 0.980183000  | 1.360071000  |
| 7  | 1.147605000  | 0.293305000  | 1.341125000  |
| 7  | 1.695894000  | -1.804145000 | -0.174929000 |
| 8  | -0.733463000 | -1.860275000 | -1.214523000 |
| 6  | -3.912984000 | 1.883651000  | 0.328672000  |
| 6  | -3.041394000 | 1.942800000  | -0.757732000 |
| 1  | -3.197887000 | 2.629701000  | -1.581498000 |
| 6  | -1.938427000 | 1.099582000  | -0.777978000 |
| 6  | -0.943845000 | 1.035997000  | -1.892154000 |
| 1  | -1.234616000 | 0.254700000  | -2.599318000 |
| 1  | -0.863929000 | 1.985511000  | -2.427079000 |
| 6  | 1.262252000  | 0.189617000  | -2.419728000 |
| 1  | 0.846983000  | -0.743225000 | -2.800153000 |
| 1  | 2.272894000  | 0.031196000  | -2.045810000 |
| 6  | 0.956842000  | 1.846742000  | -0.558754000 |
| 6  | 1.894177000  | 1.324286000  | 0.515150000  |
| 6  | 0.359555000  | 0.894750000  | 2.448726000  |
| 1  | -0.253745000 | 0.110648000  | 2.892523000  |
| 1  | -0.273925000 | 1.692232000  | 2.061181000  |
| 6  | 2.127678000  | -0.676459000 | 1.909818000  |
| 1  | 1.613341000  | -1.262447000 | 2.676619000  |
| 1  | 2.965059000  | -0.148780000 | 2.374148000  |

|   |              |              |              |
|---|--------------|--------------|--------------|
| 6 | 2.590198000  | -1.594126000 | 0.819595000  |
| 6 | 3.825105000  | -2.230666000 | 0.821434000  |
| 1 | 4.524427000  | -2.025274000 | 1.623822000  |
| 6 | 4.129321000  | -3.118018000 | -0.209875000 |
| 6 | 3.189400000  | -3.343794000 | -1.217427000 |
| 6 | 1.978133000  | -2.668832000 | -1.168967000 |
| 1 | 1.212432000  | -2.799683000 | -1.923114000 |
| 8 | -0.469869000 | -1.871189000 | 1.432898000  |
| 1 | -4.780861000 | 2.533559000  | 0.369342000  |
| 1 | -4.313442000 | 0.894422000  | 2.216884000  |
| 1 | 5.088122000  | -3.625776000 | -0.228084000 |
| 1 | 3.385389000  | -4.027489000 | -2.035060000 |
| 1 | 1.033805000  | 1.298667000  | 3.208635000  |
| 1 | 1.274224000  | 0.934956000  | -3.218973000 |
| 1 | -0.874624000 | -2.702813000 | 1.127411000  |
| 6 | 1.650388000  | 2.872796000  | -1.462960000 |
| 6 | 2.218129000  | 4.020870000  | -0.617233000 |
| 6 | 3.201275000  | 3.473258000  | 0.423672000  |
| 6 | 2.493844000  | 2.467945000  | 1.343211000  |
| 1 | 4.038224000  | 2.981461000  | -0.089669000 |
| 1 | 3.615237000  | 4.285858000  | 1.030058000  |
| 1 | 2.714572000  | 4.741148000  | -1.276194000 |
| 1 | 1.399779000  | 4.546347000  | -0.107292000 |
| 1 | 2.478782000  | 2.390948000  | -1.991202000 |
| 1 | 0.942191000  | 3.244862000  | -2.209973000 |
| 1 | 3.182479000  | 2.056966000  | 2.087899000  |
| 1 | 1.692620000  | 2.990511000  | 1.874886000  |
| 1 | 2.712340000  | 0.789515000  | 0.024323000  |
| 1 | 0.111380000  | 2.335118000  | -0.066412000 |
| 1 | -2.801660000 | -1.492126000 | -1.591169000 |
| 1 | -1.955820000 | -1.664253000 | -1.475362000 |
| 7 | -5.068868000 | -0.949622000 | -1.468727000 |
| 6 | -5.373938000 | -1.237525000 | -0.384922000 |
| 6 | -5.746106000 | -1.594483000 | 0.976746000  |
| 1 | -6.505804000 | -2.383114000 | 0.960137000  |
| 1 | -4.862168000 | -1.952061000 | 1.514729000  |
| 1 | -6.145676000 | -0.715132000 | 1.491483000  |

**II\_heter\_d (G = -2546.704836) (doublet)**

|    |              |              |              |
|----|--------------|--------------|--------------|
| 26 | -0.348997000 | -0.584192000 | 0.130344000  |
| 6  | -2.524364000 | 1.006469000  | 1.410518000  |
| 1  | -2.366298000 | 0.310751000  | 2.224498000  |
| 7  | -1.719502000 | 0.848540000  | 0.341993000  |
| 7  | 0.326694000  | 0.769098000  | -1.311180000 |
| 6  | -3.493676000 | 2.000404000  | 1.470141000  |
| 7  | 1.145296000  | 0.250137000  | 1.311036000  |
| 7  | 1.066586000  | -1.965590000 | -0.110120000 |
| 8  | -1.418734000 | -1.434764000 | -1.121909000 |
| 6  | -3.637180000 | 2.866522000  | 0.383605000  |
| 6  | -2.790634000 | 2.717367000  | -0.714115000 |
| 1  | -2.848337000 | 3.380367000  | -1.570561000 |
| 6  | -1.841118000 | 1.699563000  | -0.701426000 |
| 6  | -0.885679000 | 1.452999000  | -1.835610000 |
| 1  | -1.349326000 | 0.800248000  | -2.580958000 |
| 1  | -0.626436000 | 2.389382000  | -2.339663000 |
| 6  | 1.008156000  | 0.070575000  | -2.428240000 |
| 1  | 0.358338000  | -0.747377000 | -2.741249000 |
| 1  | 1.958797000  | -0.332585000 | -2.079384000 |
| 6  | 1.211351000  | 1.779496000  | -0.620002000 |
| 6  | 2.058922000  | 1.047972000  | 0.414297000  |
| 6  | 0.582064000  | 1.050155000  | 2.425354000  |
| 1  | -0.173460000 | 0.432682000  | 2.911143000  |
| 1  | 0.119140000  | 1.955038000  | 2.030687000  |
| 6  | 1.887963000  | -0.907525000 | 1.879033000  |
| 1  | 1.275987000  | -1.318097000 | 2.686063000  |
| 1  | 2.853601000  | -0.595853000 | 2.289307000  |
| 6  | 2.048083000  | -1.954679000 | 0.816023000  |
| 6  | 3.096849000  | -2.868747000 | 0.784488000  |
| 1  | 3.875793000  | -2.813955000 | 1.537394000  |
| 6  | 3.115860000  | -3.836758000 | -0.219387000 |
| 6  | 2.086078000  | -3.856287000 | -1.161936000 |
| 6  | 1.079181000  | -2.900720000 | -1.075175000 |
| 1  | 0.249320000  | -2.852992000 | -1.769793000 |
| 8  | -0.932915000 | -1.522394000 | 1.606677000  |
| 1  | -4.384958000 | 3.653242000  | 0.397729000  |
| 1  | -4.119432000 | 2.087055000  | 2.351206000  |
| 1  | 3.921992000  | -4.562481000 | -0.266136000 |
| 1  | 2.060755000  | -4.593732000 | -1.956701000 |
| 1  | 1.361415000  | 1.319913000  | 3.144882000  |
| 1  | 1.182657000  | 0.751399000  | -3.267127000 |
| 1  | -1.896485000 | -1.598981000 | 1.569388000  |
| 6  | 2.079369000  | 2.610507000  | -1.575745000 |
| 6  | 2.978008000  | 3.577044000  | -0.792937000 |
| 6  | 3.863833000  | 2.796465000  | 0.185378000  |
| 6  | 2.989303000  | 2.006642000  | 1.166878000  |

|   |              |              |              |
|---|--------------|--------------|--------------|
| 1 | 4.506629000  | 2.106341000  | -0.378002000 |
| 1 | 4.517722000  | 3.476541000  | 0.742658000  |
| 1 | 3.589836000  | 4.155291000  | -1.494203000 |
| 1 | 2.356998000  | 4.288184000  | -0.231102000 |
| 1 | 2.721524000  | 1.940253000  | -2.156628000 |
| 1 | 1.437383000  | 3.150604000  | -2.279432000 |
| 1 | 3.602688000  | 1.441182000  | 1.876310000  |
| 1 | 2.388427000  | 2.720342000  | 1.740026000  |
| 1 | 2.676084000  | 0.318966000  | -0.120039000 |
| 1 | 0.538193000  | 2.456735000  | -0.085058000 |
| 1 | -4.805390000 | 0.237312000  | -0.482226000 |
| 1 | -2.057991000 | -0.848731000 | -1.548340000 |
| 7 | -4.540121000 | -0.737056000 | -0.388568000 |
| 6 | -4.180268000 | -1.822716000 | -0.294237000 |
| 6 | -3.746446000 | -3.185998000 | -0.169618000 |
| 1 | -4.525477000 | -3.846742000 | -0.566865000 |
| 1 | -2.809327000 | -3.265739000 | -0.732758000 |
| 1 | -3.569840000 | -3.396711000 | 0.891977000  |

## **II\_heter\_sext (G = -2546.716803) (sextuplet)**

|    |              |              |              |
|----|--------------|--------------|--------------|
| 26 | -0.375988000 | -0.837502000 | 0.279911000  |
| 6  | -2.714096000 | 0.817050000  | 1.527189000  |
| 1  | -2.478858000 | 0.161971000  | 2.358480000  |
| 7  | -1.912282000 | 0.692788000  | 0.455466000  |
| 7  | 0.119192000  | 0.749421000  | -1.322210000 |
| 6  | -3.773135000 | 1.718408000  | 1.554188000  |
| 7  | 1.192704000  | 0.432274000  | 1.307218000  |
| 7  | 1.489998000  | -1.887197000 | -0.045096000 |
| 8  | -1.310753000 | -1.872110000 | -0.970811000 |
| 6  | -3.998156000 | 2.518008000  | 0.430106000  |
| 6  | -3.157563000 | 2.392652000  | -0.676924000 |
| 1  | -3.292133000 | 3.000991000  | -1.564871000 |
| 6  | -2.123554000 | 1.459115000  | -0.631354000 |
| 6  | -1.205335000 | 1.201381000  | -1.798398000 |
| 1  | -1.637387000 | 0.398182000  | -2.405542000 |
| 1  | -1.128312000 | 2.092305000  | -2.432304000 |
| 6  | 0.868673000  | 0.128554000  | -2.436489000 |
| 1  | 0.376065000  | -0.804123000 | -2.714348000 |
| 1  | 1.884646000  | -0.099341000 | -2.110211000 |
| 6  | 0.861480000  | 1.883971000  | -0.679460000 |
| 6  | 1.880320000  | 1.335081000  | 0.325335000  |
| 6  | 0.539854000  | 1.160890000  | 2.419101000  |
| 1  | -0.097076000 | 0.453853000  | 2.952747000  |
| 1  | -0.074135000 | 1.966863000  | 2.015271000  |
| 6  | 2.147248000  | -0.557638000 | 1.857506000  |
| 1  | 1.648930000  | -1.057775000 | 2.694428000  |
| 1  | 3.056333000  | -0.074829000 | 2.234417000  |
| 6  | 2.483675000  | -1.593396000 | 0.815564000  |
| 6  | 3.717754000  | -2.236680000 | 0.751790000  |
| 1  | 4.501804000  | -1.963592000 | 1.449820000  |
| 6  | 3.913703000  | -3.219451000 | -0.218556000 |
| 6  | 2.873320000  | -3.529482000 | -1.097855000 |
| 6  | 1.673088000  | -2.837936000 | -0.976540000 |
| 1  | 0.822942000  | -3.027739000 | -1.622113000 |
| 8  | -0.813846000 | -1.611236000 | 1.913161000  |
| 1  | -4.812424000 | 3.236096000  | 0.419140000  |
| 1  | -4.401802000 | 1.791292000  | 2.434626000  |
| 1  | 4.866812000  | -3.734231000 | -0.290529000 |
| 1  | 2.987136000  | -4.287957000 | -1.864376000 |
| 1  | 1.279000000  | 1.582250000  | 3.110184000  |
| 1  | 0.908602000  | 0.784308000  | -3.312160000 |
| 1  | -1.322982000 | -2.435041000 | 1.892700000  |
| 6  | 1.527723000  | 2.829902000  | -1.692302000 |
| 6  | 2.282362000  | 3.961785000  | -0.985874000 |
| 6  | 3.340758000  | 3.374978000  | -0.045218000 |
| 6  | 2.670689000  | 2.470792000  | 0.995291000  |
| 1  | 4.066012000  | 2.794427000  | -0.631897000 |
| 1  | 3.893150000  | 4.173128000  | 0.463772000  |
| 1  | 2.746291000  | 4.615858000  | -1.732939000 |
| 1  | 1.578066000  | 4.572118000  | -0.404145000 |
| 1  | 2.247953000  | 2.265323000  | -2.295058000 |
| 1  | 0.768107000  | 3.229755000  | -2.372633000 |
| 1  | 3.411250000  | 2.044494000  | 1.680456000  |
| 1  | 1.984379000  | 3.084900000  | 1.588865000  |
| 1  | 2.588858000  | 0.709617000  | -0.226782000 |
| 1  | 0.120292000  | 2.458975000  | -0.115356000 |
| 1  | -4.526752000 | -0.242853000 | -0.683539000 |
| 1  | -1.301145000 | -1.727968000 | -1.926099000 |
| 7  | -4.232383000 | -1.207233000 | -0.599935000 |
| 6  | -3.773532000 | -2.259222000 | -0.530732000 |
| 6  | -3.438967000 | -3.654059000 | -0.392159000 |
| 1  | -4.368524000 | -4.206881000 | -0.211626000 |
| 1  | -2.950680000 | -3.993661000 | -1.309076000 |
| 1  | -2.750384000 | -3.767482000 | 0.450049000  |

## **I\_homo\_d (G = -2413.831448) (doublet)**

|    |              |              |              |
|----|--------------|--------------|--------------|
| 26 | 0.003470000  | -1.182556000 | 0.081589000  |
| 6  | 2.659564000  | -1.698083000 | -1.140151000 |
| 1  | 2.072194000  | -2.222090000 | -1.882505000 |
| 7  | 1.972468000  | -1.104386000 | -0.147292000 |
| 7  | 0.417452000  | 0.463109000  | 1.328057000  |
| 6  | 4.044951000  | -1.623971000 | -1.202113000 |
| 7  | -0.398259000 | 0.432928000  | -1.312806000 |
| 7  | -1.994341000 | -1.068579000 | 0.182849000  |
| 8  | 0.094894000  | -2.079624000 | 1.376544000  |
| 6  | 4.729940000  | -0.918626000 | -0.211838000 |
| 6  | 4.009974000  | -0.312598000 | 0.817199000  |
| 1  | 4.500246000  | 0.247563000  | 1.605122000  |
| 6  | 2.626597000  | -0.433415000 | 0.829655000  |
| 6  | 1.752597000  | 0.122879000  | 1.911280000  |
| 1  | 1.599310000  | -0.633915000 | 2.686222000  |
| 1  | 2.194353000  | 1.009486000  | 2.372565000  |
| 6  | -0.588910000 | 0.573370000  | 2.421389000  |
| 1  | -0.712487000 | -0.407745000 | 2.877710000  |
| 1  | -1.537104000 | 0.919610000  | 2.012065000  |
| 6  | 0.545993000  | 1.737490000  | 0.523836000  |
| 6  | -0.519220000 | 1.729296000  | -0.556660000 |
| 6  | 0.627474000  | 0.479877000  | -2.389930000 |
| 1  | 0.755546000  | -0.529285000 | -2.778066000 |
| 1  | 1.570004000  | 0.850802000  | -1.989400000 |
| 6  | -1.719769000 | 0.092240000  | -1.910902000 |
| 1  | -1.564284000 | -0.675990000 | -2.673959000 |
| 1  | -2.152382000 | 0.968718000  | -2.400442000 |
| 6  | -2.620763000 | -0.428202000 | -0.832336000 |
| 6  | -4.003659000 | -0.295579000 | -0.859956000 |
| 1  | -4.466502000 | 0.239459000  | -1.681259000 |
| 6  | -4.757176000 | -0.852917000 | 0.171302000  |
| 6  | -4.103630000 | -1.522162000 | 1.207057000  |
| 6  | -2.719016000 | -1.610756000 | 1.182300000  |
| 1  | -2.162667000 | -2.109007000 | 1.965979000  |
| 8  | -0.115497000 | -2.249350000 | -1.320679000 |
| 1  | 5.811627000  | -0.837768000 | -0.242072000 |
| 1  | 4.567137000  | -2.109313000 | -2.018300000 |
| 1  | -5.838403000 | -0.761488000 | 0.169739000  |
| 1  | -4.649727000 | -1.968639000 | 2.029823000  |
| 1  | 0.285901000  | 1.137948000  | -3.193798000 |
| 1  | -0.229370000 | 1.279561000  | 3.173602000  |
| 1  | -1.033222000 | -2.500073000 | -1.533625000 |
| 6  | 0.473133000  | 3.014940000  | 1.373255000  |
| 6  | 0.596748000  | 4.250128000  | 0.471971000  |
| 6  | -0.520186000 | 4.247390000  | -0.578835000 |
| 6  | -0.427821000 | 2.981809000  | -1.440389000 |
| 1  | -1.494870000 | 4.284223000  | -0.074527000 |
| 1  | -0.446839000 | 5.128643000  | -1.224896000 |
| 1  | 0.544421000  | 5.151736000  | 1.091503000  |
| 1  | 1.572414000  | 4.247757000  | -0.031680000 |
| 1  | -0.493218000 | 3.058909000  | 1.884032000  |
| 1  | 1.260757000  | 2.997075000  | 2.132659000  |
| 1  | -1.221453000 | 2.956388000  | -2.193425000 |
| 1  | 0.534635000  | 2.989245000  | -1.960833000 |
| 1  | -1.499330000 | 1.718125000  | -0.070918000 |
| 1  | 1.526240000  | 1.699765000  | 0.041231000  |
| 1  | 0.127059000  | -4.265099000 | -0.150781000 |
| 1  | 0.152440000  | -4.746511000 | 0.417555000  |

## **TS\_homo\_d (G = -2413.826956) (doublet)**

|    |              |              |              |
|----|--------------|--------------|--------------|
| 26 | 0.016409000  | -1.134914000 | 0.068655000  |
| 6  | 2.669031000  | -1.642125000 | -1.164911000 |
| 1  | 2.082215000  | -2.155235000 | -1.915276000 |
| 7  | 1.980475000  | -1.055240000 | -0.168256000 |
| 7  | 0.415702000  | 0.447922000  | 1.337885000  |
| 6  | 4.054978000  | -1.579015000 | -1.218126000 |
| 7  | -0.397917000 | 0.404503000  | -1.322466000 |
| 7  | -1.980859000 | -1.056825000 | 0.186727000  |
| 8  | 0.136755000  | -2.177906000 | 1.334703000  |
| 6  | 4.739771000  | -0.893330000 | -0.213440000 |
| 6  | 4.019329000  | -0.299007000 | 0.821967000  |
| 1  | 4.510370000  | 0.241830000  | 1.622828000  |
| 6  | 2.634805000  | -0.408460000 | 0.824434000  |
| 6  | 1.757533000  | 0.127305000  | 1.914071000  |
| 1  | 1.618875000  | -0.642139000 | 2.679935000  |
| 1  | 2.190198000  | 1.013441000  | 2.385071000  |
| 6  | -0.579924000 | 0.544705000  | 2.440599000  |
| 1  | -0.691335000 | -0.443645000 | 2.886341000  |
| 1  | -1.535155000 | 0.884680000  | 2.042044000  |
| 6  | 0.524472000  | 1.727895000  | 0.528446000  |
| 6  | -0.536555000 | 1.704157000  | -0.558307000 |
| 6  | 0.619107000  | 0.471756000  | -2.407565000 |

|   |              |              |              |
|---|--------------|--------------|--------------|
| 1 | 0.760854000  | -0.536470000 | -2.795700000 |
| 1 | 1.558127000  | 0.856905000  | -2.012317000 |
| 6 | -1.715027000 | 0.049335000  | -1.926774000 |
| 1 | -1.548705000 | -0.740120000 | -2.666627000 |
| 1 | -2.143908000 | 0.912338000  | -2.442608000 |
| 6 | -2.618350000 | -0.452827000 | -0.842903000 |
| 6 | -4.003035000 | -0.345118000 | -0.874906000 |
| 1 | -4.475729000 | 0.161251000  | -1.708640000 |
| 6 | -4.745769000 | -0.892197000 | 0.169998000  |
| 6 | -4.080558000 | -1.528811000 | 1.218986000  |
| 6 | -2.694214000 | -1.593783000 | 1.196081000  |
| 1 | -2.126512000 | -2.072180000 | 1.983628000  |
| 8 | -0.098880000 | -2.373567000 | -1.237287000 |
| 1 | 5.822280000  | -0.820957000 | -0.236499000 |
| 1 | 4.578514000  | -2.057545000 | -2.037486000 |
| 1 | -5.828501000 | -0.820147000 | 0.167322000  |
| 1 | -4.619501000 | -1.969199000 | 2.049753000  |
| 1 | 0.262318000  | 1.122650000  | -3.210176000 |
| 1 | -0.223641000 | 1.245987000  | 3.199035000  |
| 1 | -1.017298000 | -2.605856000 | -1.471247000 |
| 6 | 0.433408000  | 3.003693000  | 1.375255000  |
| 6 | 0.537176000  | 4.241640000  | 0.474726000  |
| 6 | -0.577325000 | 4.221132000  | -0.578597000 |
| 6 | -0.464218000 | 2.956734000  | -1.440554000 |
| 1 | -1.553483000 | 4.242319000  | -0.076076000 |
| 1 | -0.517031000 | 5.103974000  | -1.223910000 |
| 1 | 0.469248000  | 5.142978000  | 1.093164000  |
| 1 | 1.513570000  | 4.255273000  | -0.027532000 |
| 1 | -0.533054000 | 3.031999000  | 1.887639000  |
| 1 | 1.221391000  | 2.998788000  | 2.134677000  |
| 1 | -1.255808000 | 2.920281000  | -2.195370000 |
| 1 | 0.498988000  | 2.979442000  | -1.959681000 |
| 1 | -1.517236000 | 1.675185000  | -0.074614000 |
| 1 | 1.505807000  | 1.701723000  | 0.046737000  |
| 1 | 0.120545000  | -3.755091000 | -0.078001000 |
| 1 | 0.174328000  | -3.617506000 | 0.721122000  |

**II\_homo\_d** (G = -2413.965275) (doublet)

|    |              |              |              |
|----|--------------|--------------|--------------|
| 26 | 0.004816000  | -1.060893000 | 0.065101000  |
| 6  | 2.664667000  | -1.623146000 | -1.181702000 |
| 1  | 2.085623000  | -2.089727000 | -1.969303000 |
| 7  | 1.975086000  | -1.047129000 | -0.179235000 |
| 7  | 0.438877000  | 0.440730000  | 1.327043000  |
| 6  | 4.053100000  | -1.610379000 | -1.221275000 |
| 7  | -0.414677000 | 0.404210000  | -1.330100000 |
| 7  | -1.982954000 | -1.040947000 | 0.216214000  |
| 8  | 0.215588000  | -2.281298000 | 1.387415000  |
| 6  | 4.749747000  | -0.976182000 | -0.191330000 |
| 6  | 4.034459000  | -0.382569000 | 0.847588000  |
| 1  | 4.533262000  | 0.124411000  | 1.665914000  |
| 6  | 2.645996000  | -0.446436000 | 0.828451000  |
| 6  | 1.770475000  | 0.102847000  | 1.912711000  |
| 1  | 1.609444000  | -0.670070000 | 2.668245000  |
| 1  | 2.213047000  | 0.980428000  | 2.391719000  |
| 6  | -0.550281000 | 0.548834000  | 2.432591000  |
| 1  | -0.673144000 | -0.446482000 | 2.857524000  |
| 1  | -1.500359000 | 0.909897000  | 2.039734000  |
| 6  | 0.554938000  | 1.716472000  | 0.513558000  |
| 6  | -0.523112000 | 1.705974000  | -0.563090000 |
| 6  | 0.579043000  | 0.467462000  | -2.434973000 |
| 1  | 0.707350000  | -0.539565000 | -2.833014000 |
| 1  | 1.530233000  | 0.838963000  | -2.055428000 |
| 6  | -1.744671000 | 0.056598000  | -1.909230000 |
| 1  | -1.593928000 | -0.730621000 | -2.655665000 |
| 1  | -2.185588000 | 0.917676000  | -2.419397000 |
| 6  | -2.635264000 | -0.448991000 | -0.812140000 |
| 6  | -4.021446000 | -0.347567000 | -0.839702000 |
| 1  | -4.501704000 | 0.147071000  | -1.676407000 |
| 6  | -4.757280000 | -0.883883000 | 0.215492000  |
| 6  | -4.081795000 | -1.498040000 | 1.271506000  |
| 6  | -2.695003000 | -1.553067000 | 1.239724000  |
| 1  | -2.123224000 | -2.000885000 | 2.042218000  |
| 8  | -0.235210000 | -2.487103000 | -1.331290000 |
| 1  | 5.834458000  | -0.941196000 | -0.199385000 |
| 1  | 4.568787000  | -2.084163000 | -2.048486000 |
| 1  | -5.840486000 | -0.817278000 | 0.217542000  |
| 1  | -4.613740000 | -1.923765000 | 2.114530000  |
| 1  | 0.218353000  | 1.123578000  | -3.232045000 |
| 1  | -0.182590000 | 1.235267000  | 3.199881000  |
| 1  | -1.146844000 | -2.790281000 | -1.497154000 |
| 6  | 0.496401000  | 2.996507000  | 1.355226000  |
| 6  | 0.595609000  | 4.234298000  | 0.454157000  |
| 6  | -0.537980000 | 4.225172000  | -0.579374000 |
| 6  | -0.452659000 | 2.959536000  | -1.442366000 |

|   |              |              |              |
|---|--------------|--------------|--------------|
| 1 | -1.504482000 | 4.255210000  | -0.058542000 |
| 1 | -0.481669000 | 5.108822000  | -1.224244000 |
| 1 | 0.548590000  | 5.137280000  | 1.072494000  |
| 1 | 1.562467000  | 4.238505000  | -0.066797000 |
| 1 | -0.459032000 | 3.036719000  | 1.887835000  |
| 1 | 1.298184000  | 2.983909000  | 2.100371000  |
| 1 | -1.256068000 | 2.932203000  | -2.185519000 |
| 1 | 0.501793000  | 2.973840000  | -1.978303000 |
| 1 | -1.496628000 | 1.686302000  | -0.063723000 |
| 1 | 1.527935000  | 1.671626000  | 0.015955000  |
| 1 | 0.292385000  | -3.290375000 | -1.166001000 |
| 1 | -0.424674000 | -3.005536000 | 1.301440000  |

**II\_homo\_q** (G = -2413.960599) (quartet)

|    |              |              |              |
|----|--------------|--------------|--------------|
| 26 | -0.008582000 | -1.123038000 | 0.091868000  |
| 6  | 2.730369000  | -1.641610000 | -1.097115000 |
| 1  | 2.160244000  | -2.160776000 | -1.857547000 |
| 7  | 2.024904000  | -1.032906000 | -0.124912000 |
| 7  | 0.478748000  | 0.582003000  | 1.375703000  |
| 6  | 4.118112000  | -1.601679000 | -1.134412000 |
| 7  | -0.424178000 | 0.346435000  | -1.311132000 |
| 7  | -2.004447000 | -1.090581000 | 0.277447000  |
| 8  | 0.289303000  | -2.419306000 | 1.301531000  |
| 6  | 4.795665000  | -0.899329000 | -0.136030000 |
| 6  | 4.062190000  | -0.268524000 | 0.866715000  |
| 1  | 4.546313000  | 0.295256000  | 1.656563000  |
| 6  | 2.673677000  | -0.364366000 | 0.852122000  |
| 6  | 1.809611000  | 0.242465000  | 1.925813000  |
| 1  | 1.662631000  | -0.499441000 | 2.716984000  |
| 1  | 2.295923000  | 1.121311000  | 2.363347000  |
| 6  | -0.507896000 | 0.704974000  | 2.472338000  |
| 1  | -0.610877000 | -0.274266000 | 2.944127000  |
| 1  | -1.471128000 | 1.014173000  | 2.064407000  |
| 6  | 0.552979000  | 1.785862000  | 0.481461000  |
| 6  | -0.545320000 | 1.679789000  | -0.579252000 |
| 6  | 0.567551000  | 0.389513000  | -2.420563000 |
| 1  | 0.709056000  | -0.627036000 | -2.788082000 |
| 1  | 1.512594000  | 0.785462000  | -2.051025000 |
| 6  | -1.756856000 | -0.029372000 | -1.875108000 |
| 1  | -1.602811000 | -0.826456000 | -2.609611000 |
| 1  | -2.205089000 | 0.816070000  | -2.403446000 |
| 6  | -2.647779000 | -0.512005000 | -0.767445000 |
| 6  | -4.031252000 | -0.386332000 | -0.790873000 |
| 1  | -4.507992000 | 0.093850000  | -1.637752000 |
| 6  | -4.770950000 | -0.875008000 | 0.285200000  |
| 6  | -4.104157000 | -1.460569000 | 1.363270000  |
| 6  | -2.719993000 | -1.546549000 | 1.326485000  |
| 1  | -2.161947000 | -1.965978000 | 2.154766000  |
| 8  | -0.170967000 | -2.635323000 | -1.533843000 |
| 1  | 5.879333000  | -0.839139000 | -0.142442000 |
| 1  | 4.647581000  | -2.104793000 | -1.935313000 |
| 1  | -5.852617000 | -0.787447000 | 0.289088000  |
| 1  | -4.641028000 | -1.838799000 | 2.225399000  |
| 1  | 0.196058000  | 1.016321000  | -3.235828000 |
| 1  | -0.177514000 | 1.433516000  | 3.220201000  |
| 1  | -1.066504000 | -2.855376000 | -1.842086000 |
| 6  | 0.476675000  | 3.118725000  | 1.239618000  |
| 6  | 0.509976000  | 4.306330000  | 0.271188000  |
| 6  | -0.649076000 | 4.196526000  | -0.725883000 |
| 6  | -0.536279000 | 2.889750000  | -1.522339000 |
| 1  | -1.602103000 | 4.218982000  | -0.180335000 |
| 1  | -0.645290000 | 5.043074000  | -1.421089000 |
| 1  | 0.446270000  | 5.242064000  | 0.837447000  |
| 1  | 1.461650000  | 4.314469000  | -0.277166000 |
| 1  | -0.463294000 | 3.160545000  | 1.799720000  |
| 1  | 1.299226000  | 3.167473000  | 1.961105000  |
| 1  | -1.351810000 | 2.802054000  | -2.247129000 |
| 1  | 0.406906000  | 2.910133000  | -2.077740000 |
| 1  | -1.509043000 | 1.649358000  | -0.061747000 |
| 1  | 1.519237000  | 1.735891000  | -0.030314000 |
| 1  | 0.213135000  | -3.474446000 | -1.226722000 |
| 1  | -0.499360000 | -2.936223000 | 1.531274000  |

**II\_homo\_sext** (G = -2413.968425) (sextuplet)

|    |              |              |              |
|----|--------------|--------------|--------------|
| 26 | 0.003090000  | -1.224321000 | 0.128468000  |
| 6  | 2.840739000  | -1.629136000 | -1.150053000 |
| 1  | 2.280744000  | -2.163450000 | -1.908161000 |
| 7  | 2.118703000  | -1.072360000 | -0.159624000 |
| 7  | 0.513371000  | 0.472229000  | 1.360754000  |
| 6  | 4.224909000  | -1.519571000 | -1.201059000 |
| 7  | -0.483225000 | 0.388499000  | -1.341358000 |









**H<sub>2</sub>** (G = -2566.658852) (doublet)

|    |              |              |              |
|----|--------------|--------------|--------------|
| 26 | 0.234991000  | -0.610036000 | -0.434992000 |
| 6  | -1.553879000 | -2.746050000 | 0.654499000  |
| 1  | -0.696576000 | -2.998120000 | 1.264574000  |
| 7  | -1.415194000 | -1.687172000 | -0.165203000 |
| 7  | -1.093008000 | 0.673616000  | -1.249191000 |
| 6  | -2.735433000 | -3.474242000 | 0.718358000  |
| 7  | 0.064745000  | 0.530982000  | 1.284622000  |
| 7  | 1.883109000  | 0.506707000  | -0.616818000 |
| 8  | 0.456097000  | -1.412645000 | -2.047190000 |
| 6  | -3.807566000 | -3.093609000 | -0.090206000 |
| 6  | -3.659414000 | -2.000843000 | -0.943131000 |
| 1  | -4.464798000 | -1.666952000 | -1.587829000 |
| 6  | -2.444070000 | -1.326103000 | -0.963003000 |
| 6  | -2.145065000 | -0.178537000 | -1.877850000 |
| 1  | -1.736472000 | -0.565594000 | -2.814359000 |
| 1  | -3.038553000 | 0.411481000  | -2.098909000 |
| 6  | -0.480203000 | 1.523533000  | -2.303908000 |
| 1  | 0.055450000  | 0.863674000  | -2.985004000 |
| 1  | 0.208595000  | 2.233022000  | -1.846336000 |
| 6  | -1.711467000 | 1.487000000  | -0.126562000 |
| 6  | -0.624521000 | 1.819810000  | 0.885573000  |
| 6  | -0.640018000 | -0.178472000 | 2.385422000  |
| 1  | -0.175454000 | -1.156568000 | 2.511323000  |
| 1  | -1.691826000 | -0.299538000 | 2.129050000  |
| 6  | 1.457660000  | 0.828506000  | 1.726954000  |
| 1  | 1.846112000  | -0.053320000 | 2.245259000  |
| 1  | 1.472688000  | 1.664695000  | 2.431836000  |
| 6  | 2.295672000  | 1.119509000  | 0.517852000  |
| 6  | 3.414057000  | 1.945451000  | 0.538492000  |
| 1  | 3.700707000  | 2.427577000  | 1.466370000  |
| 6  | 4.134367000  | 2.136597000  | -0.639094000 |
| 6  | 3.703519000  | 1.507608000  | -1.808818000 |
| 6  | 2.569197000  | 0.708627000  | -1.762107000 |
| 1  | 2.183347000  | 0.207457000  | -2.640756000 |
| 8  | 1.278770000  | -1.927759000 | 0.609465000  |
| 1  | -4.745703000 | -3.638154000 | -0.055139000 |
| 1  | -2.806726000 | -4.318167000 | 1.394907000  |
| 1  | 5.012050000  | 2.774778000  | -0.647052000 |
| 1  | 4.228616000  | 1.635123000  | -2.748367000 |
| 1  | -0.550893000 | 0.384615000  | 3.318615000  |
| 1  | -1.257112000 | 2.063123000  | -2.851541000 |
| 6  | -2.443825000 | 2.749344000  | -0.600187000 |
| 6  | -3.011093000 | 3.521838000  | 0.598511000  |
| 6  | -1.883723000 | 3.891121000  | 1.570011000  |
| 6  | -1.182214000 | 2.620923000  | 2.067656000  |
| 1  | -1.159502000 | 4.539137000  | 1.058223000  |
| 1  | -2.278509000 | 4.447841000  | 2.426792000  |
| 1  | -3.522488000 | 4.421271000  | 0.238773000  |
| 1  | -3.754192000 | 2.904423000  | 1.121022000  |
| 1  | -1.739703000 | 3.401955000  | -1.125856000 |
| 1  | -3.236079000 | 2.472827000  | -1.302947000 |
| 1  | -0.371582000 | 2.863805000  | 2.762395000  |
| 1  | -1.915998000 | 2.012422000  | 2.605618000  |
| 1  | 0.131316000  | 2.430912000  | 0.382627000  |
| 1  | -2.435618000 | 0.828284000  | 0.361174000  |
| 6  | 2.414835000  | -2.396082000 | 0.774102000  |
| 8  | 3.429778000  | -2.157859000 | -0.033802000 |
| 6  | 2.727037000  | -3.274634000 | 1.936447000  |
| 1  | 1.979670000  | -4.072461000 | 1.986177000  |
| 1  | 3.731956000  | -3.692404000 | 1.865299000  |
| 1  | 2.635872000  | -2.673381000 | 2.848815000  |
| 1  | 1.355148000  | -1.748333000 | -2.187846000 |
| 1  | 3.168656000  | -1.575075000 | -0.772845000 |

**H<sub>2</sub>** (G = -1.180942) (singlet)

|   |             |             |              |
|---|-------------|-------------|--------------|
| 1 | 0.000000000 | 0.000000000 | 0.371752000  |
| 1 | 0.000000000 | 0.000000000 | -0.371752000 |

**H<sub>2</sub>O** (G = -76.464043) (singlet)

|   |             |              |              |
|---|-------------|--------------|--------------|
| 8 | 0.000000000 | 0.000000000  | 0.120388000  |
| 1 | 0.000000000 | 0.757559000  | -0.481551000 |
| 1 | 0.000000000 | -0.757559000 | -0.481551000 |

**CH<sub>3</sub>CN** (G = -132.797503) (singlet)

|   |             |             |              |
|---|-------------|-------------|--------------|
| 6 | 0.000000000 | 0.000000000 | -1.180293000 |
| 1 | 0.000000000 | 1.030352000 | -1.551272000 |

|   |              |              |              |
|---|--------------|--------------|--------------|
| 1 | 0.892311000  | -0.515176000 | -1.551272000 |
| 1 | -0.892311000 | -0.515176000 | -1.551272000 |
| 6 | 0.000000000  | 0.000000000  | 0.277406000  |
| 7 | 0.000000000  | 0.000000000  | 1.438735000  |

**AcOH** (G = -229.160637) (singlet)

|   |              |              |              |
|---|--------------|--------------|--------------|
| 6 | -0.474791000 | 0.519312000  | 0.056040000  |
| 8 | 0.706750000  | 0.459885000  | 0.332936000  |
| 8 | -1.100852000 | 1.686135000  | -0.217914000 |
| 1 | -0.437405000 | 2.397464000  | -0.142477000 |
| 6 | -1.421770000 | -0.646803000 | -0.025526000 |
| 1 | -2.240567000 | -0.506779000 | 0.689666000  |
| 1 | -1.862286000 | -0.697403000 | -1.027280000 |
| 1 | -0.887461000 | -1.572186000 | 0.194834000  |

## References

- [1] M. Costas, J. Que, L., *Angew Chem. Int. Ed.* **2002**, *41*, 2179-2181
- [2] Gaussian 09, Revision C.01, Frisch, M. J.; Trucks, G. W.; Schlegel, H. B.; Scuseria, G. E.; Robb, M. A.; Cheeseman, J. R.; Scalmani, G.; Barone, V.; Mennucci, B.; Petersson, G. A.; Nakatsuji, H.; Caricato, M.; Li, X.; Hratchian, H. P.; Izmaylov, A. F.; Bloino, J.; Zheng, G.; Sonnenberg, J. L.; Hada, M.; Ehara, M.; Toyota, K.; Fukuda, R.; Hasegawa, J.; Ishida, M.; Nakajima, T.; Honda, Y.; Kitao, O.; Nakai, H.; Vreven, T.; Montgomery, Jr., J. A.; Peralta, J. E.; Ogliaro, F.; Bearpark, M.; Heyd, J. J.; Brothers, E.; Kudin, K. N.; Staroverov, V. N.; Kobayashi, R.; Normand, J.; Raghavachari, K.; Rendell, A.; Burant, J. C.; Iyengar, S. S.; Tomasi, J.; Cossi, M.; Rega, N.; Millam, J. M.; Klene, M.; Knox, J. E.; Cross, J. B.; Bakken, V.; Adamo, C.; Jaramillo, J.; Gomperts, R.; Stratmann, R. E.; Yazyev, O.; Austin, A. J.; Cammi, R.; Pomelli, C.; Ochterski, J. W.; Martin, R. L.; Morokuma, K.; Zakrzewski, V. G.; Voth, G. A.; Salvador, P.; Dannenberg, J. J.; Dapprich, S.; Daniels, A. D.; Farkas, Ö.; Foresman, J. B.; Ortiz, J. V.; Cioslowski, J.; Fox, D. J. Gaussian, Inc., Wallingford CT, **2009**.
- [3] a) Becke, A. D. *J. Chem. Phys.* **1993**, *98*, 1372-1377; b) Becke, A. D. *J. Chem. Phys.* **1993**, *98*, 5648-5562.
- [4] Marenich, A. V.; Cramer, C. J.; Truhlar, D. G. *J. Phys. Chem. B.* **2009**, *113*, 6378-6396.
- [5] Schwabe, T.; Grimme, S. *Phys. Chem. Chem. Phys.* **2007**, *9*, 3397-3406.
- [6] Swart, M.; Güell, M.; Luis, J.M.; Solà M.; *J. Phys. Chem. A* **2010**, *114*, 7191-7197.
- [7] Fukui, K. *Acc. Chem. Res.*, **1981**, *14*, 363-368.
