# Supplementary material for: H2 oxidation versus organic substrate oxidation in non-heme iron mediated reactions with H2O2
Source: Royal Society of Chemistry journal article supplement (doi:10.1039/c5cc06402c), 2015-01-01
Supplement: c5cc06402c2.pdf [file c5cc06402c2.pdf]

## Supplementary Information

### H-H Activation versus Organic Substrate Oxidation in Non-Heme Iron Mediated Reactions with H<sub>2</sub>O<sub>2</sub>

*Azin Hassanpour,<sup>a</sup> Ferran Acuña-Parés,<sup>b</sup> Josep M. Luis,<sup>b</sup> Olaf Cusso,<sup>b</sup> Silvia Morales de la Rosa,<sup>c</sup> José Miguel Campos-Martín,<sup>c</sup> Jose L.G. Fierro,<sup>c</sup> Miquel Costas,<sup>b,\*</sup> Julio Lloret-Fillol,<sup>b,d\*</sup> and Ruben Mas-Balleste<sup>a,\*</sup>*

---

<sup>a</sup> *Departamento de Química Inorgánica, Universidad Autónoma de Madrid, 28049 Madrid, Spain; E-mail: ruben.mas@uam.es*

<sup>b</sup> *Departament de Química, Universitat de Girona, Campus Montilivi, 17071 Girona, Catalonia (Spain), Fax: (+34) 972-41-81-50; E-mail: miquel.costas@udg.edu; julio.lloret@udg.edu*

<sup>c</sup> *Instituto de Catálisis y Petroleoquímica, CSIC, Marie Curie, s/n, Cantoblanco, 28049 Madrid, Spain*

<sup>d</sup> *The current address of J. Ll. is: Institute of Chemical Research of Catalonia (ICIQ), Av. Països Catalans 16, 43007 Tarragona, Spain E-mail: jlloret@iciq.es*

**Materials and methods:** All reagents were purchased from Aldrich and used as received unless noted otherwise. High purity deuterium and hydrogen gases were purchased from Linde and Air Liquide respectively. Iron(II) complex  $[(\alpha\text{-BPMCN})\text{Fe}(\text{OTf})_2]$  (BPMCN = N,N'-bis(2-pyridylmethyl)-1,2-diaminocyclohexane) was synthesized by procedures reported elsewhere.<sup>1</sup>  $\text{CH}_3\text{CN}$  solvent was distilled over  $\text{CaH}_2$  before use. GC product analyses were performed on a CP-3800 Varian gas chromatograph (AT-1701 column, 30 m) with a flame ionization detector. The products were identified by comparison of their GC retention times.  $^2\text{D}$ -NMR spectra were carried out on a Bruker DRX-500 spectrometer on  $\text{CH}_3\text{CN}$  solutions. Natural deuterium content of acetonitrile solvent served as internal standard. Quantification of deuterium content in  $\text{CH}_3\text{CN}$  was determined by calibration with controlled amounts of  $\text{D}_2\text{O}$  (0.1 mM, 1 mM and 10 mM).

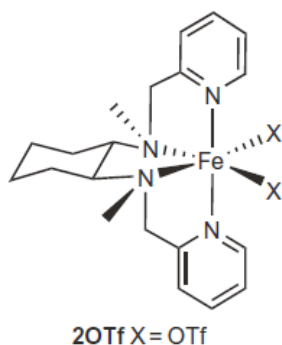

Molecular structure of iron(II) complex  $[(\alpha\text{-BPMCN})\text{Fe}(\text{OTf})_2]$

**Reaction Conditions for Catalytic oxidation of organic substrates at ambient pressure.** In a typical catalysis experiment, a total of 0.287 mL of a 70 mM  $\text{H}_2\text{O}_2$  solution (diluted from a 35%  $\text{H}_2\text{O}_2$  solution) in  $\text{CH}_3\text{CN}$  was delivered by syringe pump over 30 min at 25 °C in air to a  $\text{CH}_3\text{CN}$  solution (2.0 mL) containing iron 1 mM catalyst and 1M organic substrate. In various experiments, acetic acid (1.5 M) was added to the initial solution. The solution was stirred for another 10 min after syringe pump addition was complete.

After this procedure, Naphthalene (1mM) as an internal standard was added to the solution. When methyl phenyl sulfide was used as substrate, solution was passed through a silica column and directly injected to GC chromatographer.

When cyclohexane or cyclooctene were used as substrate, an additional work up was carried out. Thus, the resulting solutions were treated with acetic anhydride (1 mL) together with 1-methylimidazole (0.1 mL) to esterify the diol or alcohol products.

Organic products were extracted with  $\text{CHCl}_3$  and the solution was subjected to GC analysis. All experiments were run at least in duplicate, the reported data being the average of these reactions.

Catalysis runs were carried out under Argon atmosphere or in  $\text{H}_2$  atmosphere. For argon atmosphere experiments the solutions containing the iron catalyst and the organic substrate were subjected to three successive freeze drying cycles. Analogously, for  $\text{H}_2$  atmosphere reactions also three successive freeze drying cycles were executed to replace air by  $\text{H}_2$ . In addition, catalytic runs under  $\text{H}_2$  atmosphere were performed while bubbling a controlled  $\text{H}_2$  flow to the reaction flask of  $200 \text{ cm}^3$  per minute.

**Reaction Conditions at controlled pressures of  $\text{H}_2$  or  $\text{D}_2$ .** In order to perform catalytic reactions at controlled pressures of  $\text{H}_2$  or  $\text{D}_2$ , a magnetically stirred thermostated teflon-lined steel reactor was used (Berghof BR 100). Injection of  $\text{H}_2\text{O}_2$  under high pressure conditions was achieved by using a 307 Gilson HPLC pump. Tube of the reactor was charged with dry acetonitrile as a solvent, Fe complex (1 mM) and cyclohexane (1 M).  $\text{H}_2$  pressure set to 10, 8, 6 or 4 atmosphere and a solution of 10 equiv  $\text{H}_2\text{O}_2$  (final concentration: 10 mM) was injected over a period of 30 min under pressure and stirring for 30 additional minutes.

Analogous experiments were made by using  $\text{D}_2$  instead of  $\text{H}_2$ , or adding acetic acid (1.5M) to the reaction media.

After finishing the reaction, acetylation work up was carried out and products analyzed by GC chromatography.

Alternatively, reaction runs at 10 atm of  $\text{D}_2$ , in absence of cyclohexane were also carried out, and the reaction mixture analyzed directly by  $^2\text{D}$ -NMR without further treatment. As a control reaction, reaction run at 10 atm of  $\text{D}_2$ , in absence of cyclohexane and in absence of Iron catalyst was performed, and the reaction mixture also directly analyzed.

### **Computational details**

The density functional theory (DFT) study was carried out using the Gaussian09 software package<sup>2</sup> and the B3LYP hybrid exchange-correlation functional.<sup>3</sup> Optimizations were performed with the 6-31G(d,p) basis set for all atoms. Solvent effects were taken into account in geometry optimizations and energies ( $G_{\text{solv}}$  correction) through the SMD polarizable continuum model, with acetonitrile as implicit solvent.<sup>4</sup> Dispersion effects were also introduced with the Grimme- $\text{D}_2$  correction

$(G_{disp})$ .<sup>5</sup>

The energies were further refined by single-point calculations with the cc-pVTZ dunning basis set for all atoms. All calculations employed the spin-unrestricted formalism and spin-contaminated energies were systematically corrected ( $E_{spin\ corr.}$ ) using the equations described in reference 6.

Thermal plus entropy corrections at 298.15 K were obtained from solvent phase frequency calculations at B3LYP/6-31G(d,p) level ( $G_{corr}$ ). All calculated solvation free energies use a standard state liquid phase concentration of 1 mol·L<sup>-1</sup>, but for acetonitrile itself a 19.1 M standard state was employed. The free energy change associated with moving from a standard-state gas phase pressure of 1 atm to a standard state gas phase concentration of 1 M (19.1 M for acetonitrile) was calculated. The value of  $\Delta G^{o/*}$  at 298.15 K is 1.9 kcal·mol<sup>-1</sup> for 1 M standard state solutes and 3.6 kcal·mol<sup>-1</sup> for 19.1 M standard state acetonitrile.

The final free energy ( $G$ ) was obtained by adding the previous corrections to the spin corrected potential energy  $E_{spin\ corr.}$ :

$$G = E_{spin\ corr.} + G_{solv.} + G_{corr.} + G_{disp.} + \Delta G^{o/*} \quad (1)$$

The nature of the located stationary points was established by frequency calculations in solvent phase, where transition states have only one imaginary frequency. Finally, the connectivity of all transition states respect to the associated minimums was confirmed through intrinsic reaction coordinate (IRC) calculations.<sup>7</sup>

Labels **I**, **TS** and **II** were used as short nomenclature of reactant complexes, transition states and products involved in the H-H bond breaking event. The **homo** and **heter** notations are related to the homolytic or heterolytic nature of the H-H bond cleavage. Labels **d**, **q** and **sext** are used to specify the doublet, quartet and sextuple spin state of the iron center.

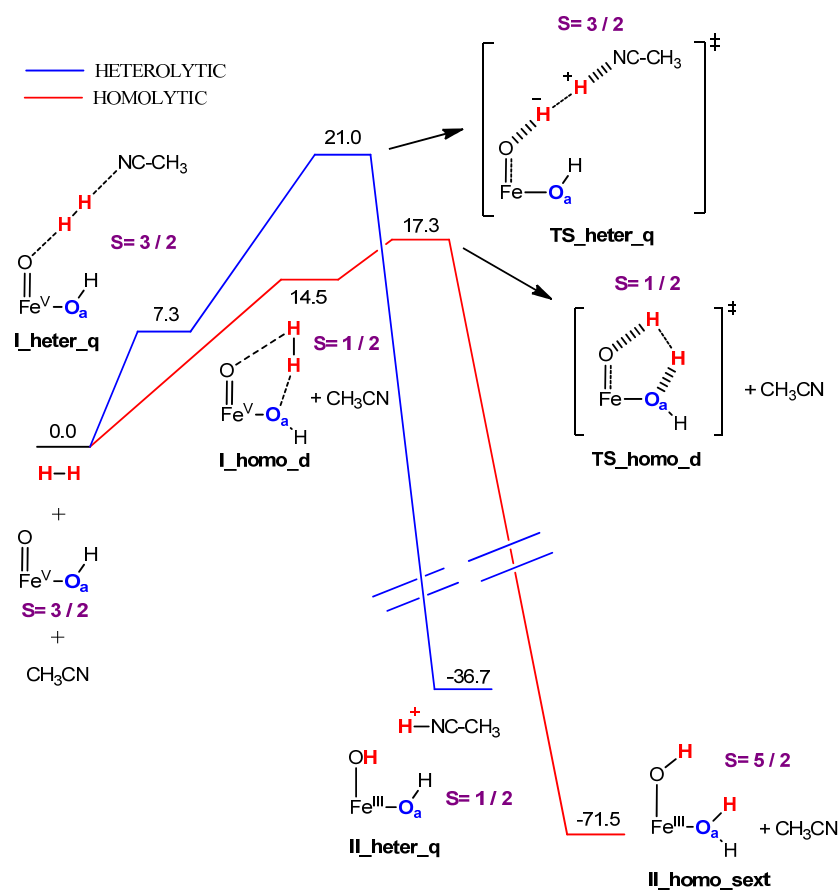

**Figure SI.1.** Homolytic vs heterolytic minimum free energy profiles for the  $\text{H}_2$  oxidation by  $[\text{Fe}^{\text{V}}(\text{O})(\text{OH})(\text{BPMCN})]^{2+}$ . All species are labeled with its ground spin state. Gibbs energy values are given in  $\text{kcal}\cdot\text{mol}^{-1}$ .

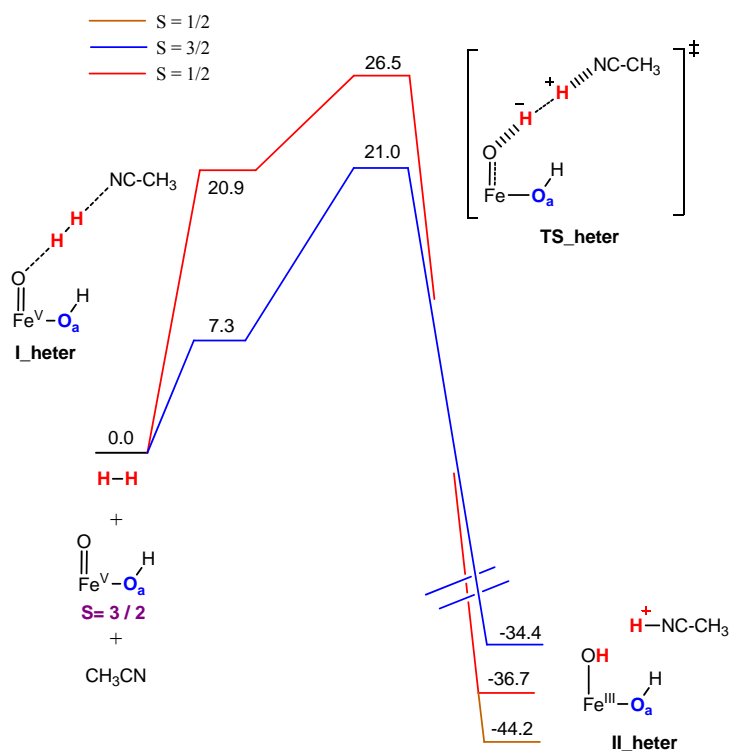

**Figure SI.2.** Heterolytic  $\text{H}_2$  oxidation free energy profiles found for  $[\text{Fe}^{\text{V}}(\text{O})(\text{OH})(\text{BPMCN})]^{2+}$  in the  $S = 1/2$  and  $3/2$  spin states. Gibbs energy values are given in  $\text{kcal}\cdot\text{mol}^{-1}$ .

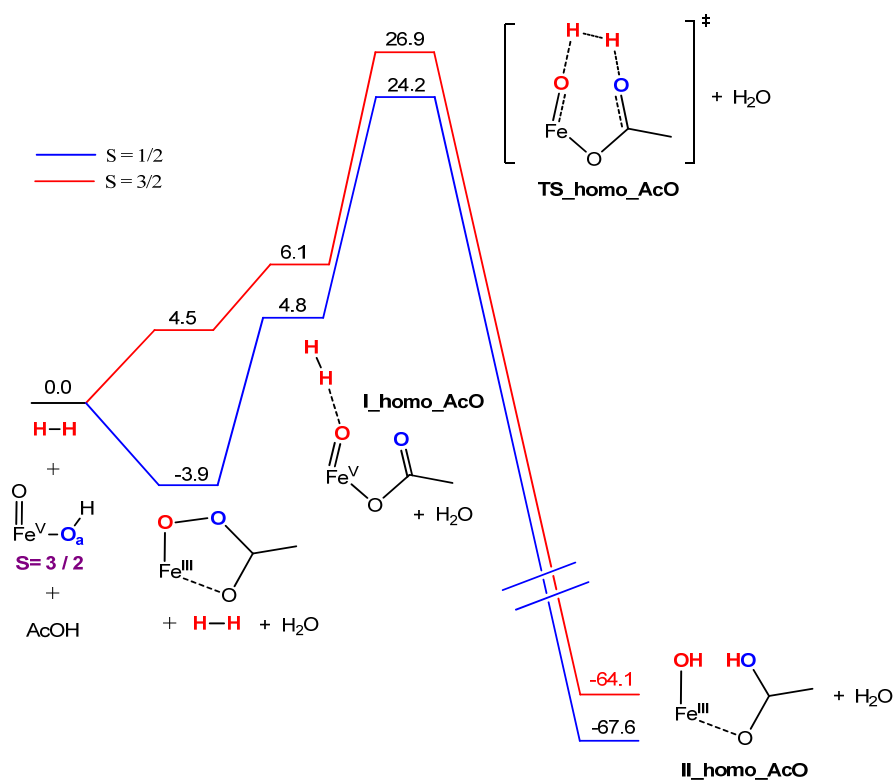

**Figure SI.3.** Homolytic  $\text{H}_2$  oxidation free energy profiles found for  $[\text{Fe}^{\text{IV}}(\text{AcO}\cdot)(\text{BPMCN})]^{2+}$  in the  $S = 1/2$  and  $3/2$  spin states. Gibbs energy values are given in  $\text{kcal}\cdot\text{mol}^{-1}$ .

## Cartesian coordinates

In parenthesis are the free energies (in hartrees) and the spin state of each iron intermediate.

### [Fe<sup>V</sup>(O)(OH)(BPMCN)]<sup>2+</sup> (G = -2412.676640) (quartet)

|    |              |              |              |
|----|--------------|--------------|--------------|
| 26 | 0.028550000  | -1.187031000 | -0.034618000 |
| 6  | -2.649450000 | -1.658913000 | 1.162711000  |
| 1  | -2.062738000 | -2.137729000 | 1.935512000  |
| 7  | -1.962026000 | -1.102427000 | 0.147942000  |
| 7  | -0.406316000 | 0.384202000  | -1.340655000 |
| 6  | -4.036415000 | -1.609442000 | 1.200267000  |
| 7  | 0.399113000  | 0.387831000  | 1.344932000  |
| 7  | 2.001236000  | -1.026129000 | -0.205035000 |
| 8  | -0.071348000 | -2.293461000 | -1.234084000 |
| 6  | -4.720510000 | -0.975145000 | 0.162442000  |
| 6  | -3.998173000 | -0.412026000 | -0.889042000 |
| 1  | -4.487094000 | 0.092972000  | -1.714061000 |
| 6  | -2.612860000 | -0.502578000 | -0.874778000 |
| 6  | -1.718542000 | 0.014021000  | -1.955054000 |
| 1  | -1.534718000 | -0.776832000 | -2.688765000 |
| 1  | -2.148131000 | 0.877605000  | -2.468649000 |
| 6  | 0.608890000  | 0.501116000  | -2.423835000 |
| 1  | 0.762146000  | -0.489904000 | -2.849777000 |
| 1  | 1.540801000  | 0.889652000  | -2.016099000 |
| 6  | -0.566601000 | 1.660658000  | -0.531553000 |
| 6  | 0.489357000  | 1.681642000  | 0.562539000  |
| 6  | -0.602985000 | 0.435285000  | 2.441395000  |
| 1  | -0.708453000 | -0.571206000 | 2.845826000  |
| 1  | -1.558619000 | 0.785914000  | 2.052690000  |
| 6  | 1.734641000  | 0.069567000  | 1.923316000  |
| 1  | 1.602973000  | -0.733180000 | 2.654919000  |
| 1  | 2.154240000  | 0.941733000  | 2.431977000  |
| 6  | 2.629886000  | -0.412629000 | 0.825522000  |
| 6  | 4.013574000  | -0.289222000 | 0.845306000  |
| 1  | 4.484970000  | 0.224735000  | 1.675085000  |
| 6  | 4.757148000  | -0.831922000 | -0.201016000 |
| 6  | 4.096774000  | -1.485942000 | -1.243168000 |
| 6  | 2.712950000  | -1.569055000 | -1.213696000 |
| 1  | 2.148288000  | -2.064580000 | -1.992974000 |
| 8  | 0.176070000  | -2.312559000 | 1.332514000  |
| 1  | -5.804020000 | -0.917635000 | 0.172423000  |
| 1  | -4.560068000 | -2.062868000 | 2.033691000  |
| 1  | 5.838845000  | -0.745993000 | -0.203715000 |
| 1  | 4.637479000  | -1.927750000 | -2.071864000 |
| 1  | -0.259541000 | 1.106619000  | 3.233190000  |
| 1  | 0.234545000  | 1.172894000  | -3.200376000 |
| 1  | 0.207044000  | -3.237125000 | 1.026891000  |
| 6  | -0.517958000 | 2.932733000  | -1.387899000 |
| 6  | -0.667298000 | 4.173846000  | -0.497954000 |
| 6  | 0.443003000  | 4.200131000  | 0.559365000  |
| 6  | 0.368614000  | 2.940236000  | 1.431212000  |
| 1  | 1.419910000  | 4.250348000  | 0.060435000  |
| 1  | 0.349704000  | 5.086053000  | 1.196438000  |
| 1  | -0.628035000 | 5.071091000  | -1.124808000 |
| 1  | -1.645647000 | 4.158388000  | 0.000394000  |
| 1  | 0.448049000  | 2.990051000  | -1.898687000 |
| 1  | -1.304286000 | 2.893475000  | -2.147984000 |
| 1  | 1.157209000  | 2.935719000  | 2.190212000  |
| 1  | -0.597317000 | 2.933994000  | 1.945697000  |
| 1  | 1.472576000  | 1.686162000  | 0.083275000  |
| 1  | -1.548493000 | 1.599838000  | -0.055013000 |

### [Fe<sup>V</sup>(O)(OH)(BPMCN)]<sup>2+</sup> (G = -2412.651179) (doublet)

|    |              |              |              |
|----|--------------|--------------|--------------|
| 26 | 0.031626000  | -1.194262000 | -0.057828000 |
| 6  | -2.658088000 | -1.671084000 | 1.167399000  |
| 1  | -2.088605000 | -2.138770000 | 1.959598000  |
| 7  | -1.961414000 | -1.130963000 | 0.149022000  |
| 7  | -0.415432000 | 0.389352000  | -1.329956000 |
| 6  | -4.044207000 | -1.613122000 | 1.210095000  |
| 7  | 0.403061000  | 0.387475000  | 1.329492000  |
| 7  | 2.007343000  | -1.044949000 | -0.203216000 |
| 8  | -0.075045000 | -2.234140000 | -1.291561000 |
| 6  | -4.727159000 | -0.974915000 | 0.174326000  |
| 6  | -4.000717000 | -0.412624000 | -0.874001000 |
| 1  | -4.486110000 | 0.104307000  | -1.693760000 |
| 6  | -2.615890000 | -0.515455000 | -0.862948000 |
| 6  | -1.729922000 | 0.022968000  | -1.940611000 |
| 1  | -1.548077000 | -0.750462000 | -2.693115000 |
| 1  | -2.170257000 | 0.893139000  | -2.433330000 |
| 6  | 0.598766000  | 0.511113000  | -2.416833000 |
| 1  | 0.747429000  | -0.473887000 | -2.857219000 |

|   |              |              |              |
|---|--------------|--------------|--------------|
| 1 | 1.534362000  | 0.889600000  | -2.008475000 |
| 6 | -0.568966000 | 1.667021000  | -0.525662000 |
| 6 | 0.497542000  | 1.682687000  | 0.556565000  |
| 6 | -0.602408000 | 0.438934000  | 2.423800000  |
| 1 | -0.706288000 | -0.564970000 | 2.833216000  |
| 1 | -1.558344000 | 0.786438000  | 2.033259000  |
| 6 | 1.733877000  | 0.064638000  | 1.916589000  |
| 1 | 1.594740000  | -0.727016000 | 2.657894000  |
| 1 | 2.155095000  | 0.939731000  | 2.418880000  |
| 6 | 2.632949000  | -0.430884000 | 0.827580000  |
| 6 | 4.017053000  | -0.309291000 | 0.858262000  |
| 1 | 4.482769000  | 0.205772000  | 1.690610000  |
| 6 | 4.768345000  | -0.853520000 | -0.181398000 |
| 6 | 4.113016000  | -1.503955000 | -1.228431000 |
| 6 | 2.728389000  | -1.583123000 | -1.207714000 |
| 1 | 2.171879000  | -2.073121000 | -1.996410000 |
| 8 | 0.200594000  | -2.280889000 | 1.337261000  |
| 1 | -5.810104000 | -0.908441000 | 0.186939000  |
| 1 | -4.567249000 | -2.058226000 | 2.048318000  |
| 1 | 5.850199000  | -0.769605000 | -0.176253000 |
| 1 | 4.657720000  | -1.944753000 | -2.055119000 |
| 1 | -0.260225000 | 1.115108000  | 3.211945000  |
| 1 | 0.224843000  | 1.194471000  | -3.183188000 |
| 1 | -0.336368000 | -3.087432000 | 1.221510000  |
| 6 | -0.524829000 | 2.939988000  | -1.381350000 |
| 6 | -0.662006000 | 4.179891000  | -0.487870000 |
| 6 | 0.460297000  | 4.201313000  | 0.557018000  |
| 6 | 0.390411000  | 2.940923000  | 1.428378000  |
| 1 | 1.431674000  | 4.248411000  | 0.047079000  |
| 1 | 0.377441000  | 5.086898000  | 1.196021000  |
| 1 | -0.627192000 | 5.078018000  | -1.113702000 |
| 1 | -1.634737000 | 4.166217000  | 0.021402000  |
| 1 | 0.436913000  | 2.996932000  | -1.899894000 |
| 1 | -1.317602000 | 2.904611000  | -2.134895000 |
| 1 | 1.186423000  | 2.932977000  | 2.179537000  |
| 1 | -0.570239000 | 2.938901000  | 1.952463000  |
| 1 | 1.476974000  | 1.683092000  | 0.069646000  |
| 1 | -1.547365000 | 1.607693000  | -0.041580000 |

### I\_heter\_q (G = -2546.634697) (quartet)

|    |              |              |              |
|----|--------------|--------------|--------------|
| 26 | 0.262316000  | -0.997734000 | 0.011107000  |
| 6  | -2.389857000 | -0.335981000 | 1.171861000  |
| 1  | -2.044371000 | -0.979854000 | 1.969665000  |
| 7  | -1.530462000 | -0.125686000 | 0.157640000  |
| 7  | 0.492251000  | 0.568653000  | -1.350115000 |
| 6  | -3.647291000 | 0.251104000  | 1.177480000  |
| 7  | 1.220840000  | 0.348192000  | 1.346798000  |
| 7  | 2.139697000  | -1.636049000 | -0.131207000 |
| 8  | -0.260341000 | -2.015956000 | -1.157040000 |
| 6  | -4.019682000 | 1.067195000  | 0.108637000  |
| 6  | -3.126041000 | 1.267668000  | -0.942006000 |
| 1  | -3.372641000 | 1.892676000  | -1.792602000 |
| 6  | -1.886784000 | 0.644057000  | -0.895106000 |
| 6  | -0.857669000 | 0.723672000  | -1.975303000 |
| 1  | -1.000164000 | -0.105610000 | -2.675152000 |
| 1  | -0.909026000 | 1.664848000  | -2.528154000 |
| 6  | 1.471297000  | 0.235677000  | -2.420897000 |
| 1  | 1.218121000  | -0.747854000 | -2.815712000 |
| 1  | 2.480947000  | 0.234016000  | -2.013698000 |
| 6  | 0.849916000  | 1.833280000  | -0.587425000 |
| 6  | 1.819240000  | 1.473204000  | 0.527577000  |
| 6  | 0.316503000  | 0.824648000  | 2.424960000  |
| 1  | -0.171941000 | -0.045000000 | 2.864459000  |
| 1  | -0.428193000 | 1.502879000  | 2.009682000  |
| 6  | 2.319055000  | -0.452480000 | 1.957567000  |
| 1  | 1.875448000  | -1.114199000 | 2.707141000  |
| 1  | 3.045924000  | 0.199418000  | 2.449844000  |
| 6  | 2.956518000  | -1.284706000 | 0.889890000  |
| 6  | 4.276645000  | -1.715442000 | 0.928516000  |
| 1  | 4.910057000  | -1.400171000 | 1.749789000  |
| 6  | 4.748322000  | -2.544117000 | -0.087967000 |
| 6  | 3.886104000  | -2.921337000 | -1.119767000 |
| 6  | 2.581869000  | -2.450417000 | -1.110678000 |
| 1  | 1.868973000  | -2.709978000 | -1.882609000 |
| 8  | -0.052265000 | -2.041098000 | 1.414606000  |
| 1  | -4.995367000 | 1.540872000  | 0.093958000  |
| 1  | -4.317418000 | 0.063397000  | 2.008087000  |
| 1  | 5.776058000  | -2.891884000 | -0.075749000 |

|   |              |              |              |
|---|--------------|--------------|--------------|
| 1 | 4.211106000  | -3.569697000 | -1.924973000 |
| 1 | 0.894078000  | 1.341183000  | 3.196372000  |
| 1 | 1.396193000  | 0.975541000  | -3.221607000 |
| 1 | -0.374663000 | -2.918376000 | 1.141189000  |
| 6 | 1.410907000  | 2.945946000  | -1.482530000 |
| 6 | 1.761023000  | 4.176493000  | -0.635331000 |
| 6 | 2.778536000  | 3.799881000  | 0.448270000  |
| 6 | 2.200783000  | 2.706312000  | 1.355889000  |
| 1 | 3.701014000  | 3.439781000  | -0.026098000 |
| 1 | 3.037268000  | 4.673789000  | 1.055667000  |
| 1 | 2.161635000  | 4.958963000  | -1.288594000 |
| 1 | 0.852572000  | 4.571098000  | -0.161388000 |
| 1 | 2.323757000  | 2.593618000  | -1.972875000 |
| 1 | 0.681090000  | 3.193956000  | -2.259326000 |
| 1 | 2.916106000  | 2.416930000  | 2.132266000  |
| 1 | 1.307183000  | 3.102785000  | 1.848409000  |
| 1 | 2.727954000  | 1.072418000  | 0.069437000  |
| 1 | -0.078134000 | 2.188252000  | -0.131042000 |
| 1 | -3.524777000 | -1.998895000 | -1.284722000 |
| 1 | -2.787808000 | -2.075269000 | -1.349633000 |
| 7 | -6.077504000 | -1.644025000 | -0.916259000 |
| 6 | -6.628868000 | -0.987954000 | -0.132546000 |
| 6 | -7.313157000 | -0.158063000 | 0.850637000  |
| 1 | -8.195234000 | -0.683614000 | 1.231126000  |
| 1 | -6.635699000 | 0.059645000  | 1.682847000  |
| 1 | -7.627391000 | 0.782420000  | 0.386317000  |

**TS\_heter\_q** (G = -2546.612813) (quartet)

|    |              |              |              |
|----|--------------|--------------|--------------|
| 26 | -0.031073000 | -0.854715000 | 0.058343000  |
| 6  | -2.528438000 | 0.173246000  | 1.289491000  |
| 1  | -2.273184000 | -0.541459000 | 2.060514000  |
| 7  | -1.684192000 | 0.245365000  | 0.242749000  |
| 7  | 0.381137000  | 0.660288000  | -1.313755000 |
| 6  | -3.654694000 | 0.981639000  | 1.364597000  |
| 7  | 1.152211000  | 0.291028000  | 1.340665000  |
| 7  | 1.694493000  | -1.802982000 | -0.176914000 |
| 8  | -0.748609000 | -1.856942000 | -1.185292000 |
| 6  | -3.918196000 | 1.877098000  | 0.327618000  |
| 6  | -3.048138000 | 1.935178000  | -0.759837000 |
| 1  | -3.209835000 | 2.615801000  | -1.587784000 |
| 6  | -1.940109000 | 1.098426000  | -0.775959000 |
| 6  | -0.945193000 | 1.036434000  | -1.890128000 |
| 1  | -1.236577000 | 0.257739000  | -2.600137000 |
| 1  | -0.865530000 | 1.987114000  | -2.423098000 |
| 6  | 1.258432000  | 0.186372000  | -2.419387000 |
| 1  | 0.841695000  | -0.746433000 | -2.798062000 |
| 1  | 2.269516000  | 0.027178000  | -2.047156000 |
| 6  | 0.958255000  | 1.845525000  | -0.559232000 |
| 6  | 1.897291000  | 1.322061000  | 0.512988000  |
| 6  | 0.368642000  | 0.893078000  | 2.451074000  |
| 1  | -0.243648000 | 0.109309000  | 2.896639000  |
| 1  | -0.265378000 | 1.691379000  | 2.066042000  |
| 6  | 2.133800000  | -0.678647000 | 1.906946000  |
| 1  | 1.621040000  | -1.265069000 | 2.674431000  |
| 1  | 2.972236000  | -0.150959000 | 2.369373000  |
| 6  | 2.592462000  | -1.595375000 | 0.814832000  |
| 6  | 3.826816000  | -2.232927000 | 0.811959000  |
| 1  | 4.528842000  | -2.029359000 | 1.612440000  |
| 6  | 4.126924000  | -3.118904000 | -0.221696000 |
| 6  | 3.183187000  | -3.342613000 | -1.226140000 |
| 6  | 1.972264000  | -2.667401000 | -1.172674000 |
| 1  | 1.202133000  | -2.798105000 | -1.921691000 |
| 8  | -0.466577000 | -1.865295000 | 1.446312000  |
| 1  | -4.790368000 | 2.521425000  | 0.364994000  |
| 1  | -4.311046000 | 0.897052000  | 2.222323000  |
| 1  | 5.085167000  | -3.627572000 | -0.243779000 |
| 1  | 3.375584000  | -4.025997000 | -2.044913000 |
| 1  | 1.045942000  | 1.296231000  | 3.208629000  |
| 1  | 1.270048000  | 0.931073000  | -3.219245000 |
| 1  | -0.865419000 | -2.701829000 | 1.148614000  |
| 6  | 1.651889000  | 2.869963000  | -1.465232000 |
| 6  | 2.222930000  | 4.017711000  | -0.621265000 |
| 6  | 3.206983000  | 3.469265000  | 0.418334000  |
| 6  | 2.499662000  | 2.465403000  | 1.339516000  |
| 1  | 4.042367000  | 2.975967000  | -0.096122000 |
| 1  | 3.623124000  | 4.281612000  | 1.023564000  |
| 1  | 2.719391000  | 4.736710000  | -1.281610000 |
| 1  | 1.406304000  | 4.544864000  | -0.110300000 |
| 1  | 2.478643000  | 2.386400000  | -1.994450000 |
| 1  | 0.943143000  | 3.242715000  | -2.211384000 |
| 1  | 3.189001000  | 2.054001000  | 2.083312000  |
| 1  | 1.699965000  | 2.989230000  | 1.872247000  |
| 1  | 2.714173000  | 0.787060000  | 0.020266000  |
| 1  | 0.114328000  | 2.335237000  | -0.065531000 |
| 1  | -2.786177000 | -1.477550000 | -1.616451000 |

|   |              |              |              |
|---|--------------|--------------|--------------|
| 1 | -1.879251000 | -1.665387000 | -1.437425000 |
| 7 | -5.082062000 | -0.950201000 | -1.479174000 |
| 6 | -5.382633000 | -1.234359000 | -0.393105000 |
| 6 | -5.748850000 | -1.587269000 | 0.971270000  |
| 1 | -6.508299000 | -2.376257000 | 0.960091000  |
| 1 | -4.862590000 | -1.942868000 | 1.506743000  |
| 1 | -6.146779000 | -0.706653000 | 1.485124000  |

**II\_heter\_q** (G = -2546.701201) (quartet)

|    |              |              |              |
|----|--------------|--------------|--------------|
| 26 | -0.221911000 | -0.720236000 | 0.211667000  |
| 6  | -2.795776000 | 0.631195000  | 1.552550000  |
| 1  | -2.480348000 | 0.024068000  | 2.394303000  |
| 7  | -1.984574000 | 0.600069000  | 0.484439000  |
| 7  | -0.000686000 | 0.734175000  | -1.300220000 |
| 6  | -3.962379000 | 1.389760000  | 1.569565000  |
| 7  | 1.120290000  | 0.465704000  | 1.294835000  |
| 7  | 1.738051000  | -1.696135000 | -0.152688000 |
| 8  | -1.119656000 | -1.931371000 | -0.859025000 |
| 6  | -4.285586000 | 2.142054000  | 0.435737000  |
| 6  | -3.439986000 | 2.105678000  | -0.674283000 |
| 1  | -3.654815000 | 2.675951000  | -1.571800000 |
| 6  | -2.297083000 | 1.308873000  | -0.612424000 |
| 6  | -1.354773000 | 1.131410000  | -1.775172000 |
| 1  | -1.737679000 | 0.336854000  | -2.424752000 |
| 1  | -1.299463000 | 2.041068000  | -2.381239000 |
| 6  | 0.768270000  | 0.188045000  | -2.449047000 |
| 1  | 0.334656000  | -0.773972000 | -2.726868000 |
| 1  | 1.805867000  | 0.037532000  | -2.153138000 |
| 6  | 0.679783000  | 1.929460000  | -0.660783000 |
| 6  | 1.742480000  | 1.444532000  | 0.326993000  |
| 6  | 0.415536000  | 1.129613000  | 2.421737000  |
| 1  | -0.172607000 | 0.367908000  | 2.934637000  |
| 1  | -0.247680000 | 1.903332000  | 2.035085000  |
| 6  | 2.160349000  | -0.438271000 | 1.854015000  |
| 1  | 1.690580000  | -1.000082000 | 2.666860000  |
| 1  | 2.994735000  | 0.138553000  | 2.266068000  |
| 6  | 2.633275000  | -1.415541000 | 0.808734000  |
| 6  | 3.883635000  | -2.030239000 | 0.851687000  |
| 1  | 4.588336000  | -1.767664000 | 1.633634000  |
| 6  | 4.193345000  | -2.978797000 | -0.122912000 |
| 6  | 3.249608000  | -3.282412000 | -1.108241000 |
| 6  | 2.028993000  | -2.614405000 | -1.085670000 |
| 1  | 1.250926000  | -2.802008000 | -1.818022000 |
| 8  | -0.593288000 | -1.685978000 | 1.708769000  |
| 1  | -5.183805000 | 2.751549000  | 0.418249000  |
| 1  | -4.597595000 | 1.393508000  | 2.448468000  |
| 1  | 5.159224000  | -3.474563000 | -0.115207000 |
| 1  | 3.454229000  | -4.017366000 | -1.879013000 |
| 1  | 1.131874000  | 1.577509000  | 3.117795000  |
| 1  | 0.724298000  | 0.866101000  | -3.306861000 |
| 1  | -1.204976000 | -2.402756000 | 1.479880000  |
| 6  | 1.271798000  | 2.918418000  | -1.675077000 |
| 6  | 1.948016000  | 4.094958000  | -0.959379000 |
| 6  | 3.045695000  | 3.579964000  | -0.021463000 |
| 6  | 2.443730000  | 2.624167000  | 1.015089000  |
| 1  | 3.809640000  | 3.054527000  | -0.610503000 |
| 1  | 3.539216000  | 4.412983000  | 0.491408000  |
| 1  | 2.363820000  | 4.783082000  | -1.703721000 |
| 1  | 1.202289000  | 4.650443000  | -0.374826000 |
| 1  | 2.025806000  | 2.406475000  | -2.282333000 |
| 1  | 0.484111000  | 3.272119000  | -2.348153000 |
| 1  | 3.215141000  | 2.245644000  | 1.693706000  |
| 1  | 1.714541000  | 3.179846000  | 1.614486000  |
| 1  | 2.493112000  | 0.883720000  | -0.237591000 |
| 1  | -0.095819000 | 2.446128000  | -0.088361000 |
| 1  | -4.519697000 | -0.652655000 | -0.591679000 |
| 1  | -1.339764000 | -1.590392000 | -1.738566000 |
| 7  | -4.127760000 | -1.583037000 | -0.521686000 |
| 6  | -3.582522000 | -2.593124000 | -0.462052000 |
| 6  | -3.112537000 | -3.951364000 | -0.360583000 |
| 1  | -3.979748000 | -4.616466000 | -0.447640000 |
| 1  | -2.386057000 | -4.131865000 | -1.155833000 |
| 1  | -2.629561000 | -4.083445000 | 0.613355000  |

**I\_heter\_d** (G = -2546.613035) (doublet)

|    |              |              |              |
|----|--------------|--------------|--------------|
| 26 | 0.255878000  | -0.997574000 | -0.026745000 |
| 6  | -2.417796000 | -0.323800000 | 1.137333000  |
| 1  | -2.095621000 | -0.952317000 | 1.956690000  |
| 7  | -1.543659000 | -0.132473000 | 0.131175000  |
| 7  | 0.504293000  | 0.594966000  | -1.341182000 |
| 6  | -3.670424000 | 0.272322000  | 1.133101000  |
| 7  | 1.219275000  | 0.340307000  | 1.332246000  |
| 7  | 2.125094000  | -1.667855000 | -0.127822000 |



|   |              |              |              |
|---|--------------|--------------|--------------|
| 8 | -0.238444000 | -1.933580000 | -1.247634000 |
| 6 | -4.026366000 | 1.092771000  | 0.062341000  |
| 6 | -3.115122000 | 1.293247000  | -0.972333000 |
| 1 | -3.342368000 | 1.929607000  | -1.819953000 |
| 6 | -1.882048000 | 0.657484000  | -0.913280000 |
| 6 | -0.837818000 | 0.762928000  | -1.978346000 |
| 1 | -0.969169000 | -0.045692000 | -2.704086000 |
| 1 | -0.887333000 | 1.718541000  | -2.505691000 |
| 6 | 1.500019000  | 0.268773000  | -2.401958000 |
| 1 | 1.254564000  | -0.709107000 | -2.814530000 |
| 1 | 2.502487000  | 0.259265000  | -1.977394000 |
| 6 | 0.865183000  | 1.850791000  | -0.571201000 |
| 6 | 1.833208000  | 1.469292000  | 0.536186000  |
| 6 | 0.305523000  | 0.817901000  | 2.403220000  |
| 1 | -0.189119000 | -0.050704000 | 2.836089000  |
| 1 | -0.433181000 | 1.499837000  | 1.983519000  |
| 6 | 2.301571000  | -0.472786000 | 1.954934000  |
| 1 | 1.846765000  | -1.117406000 | 2.711808000  |
| 1 | 3.034783000  | 0.174295000  | 2.444222000  |
| 6 | 2.935196000  | -1.323987000 | 0.899474000  |
| 6 | 4.249859000  | -1.770572000 | 0.958693000  |
| 1 | 4.875654000  | -1.459475000 | 1.787438000  |
| 6 | 4.726812000  | -2.607475000 | -0.048150000 |
| 6 | 3.874873000  | -2.972596000 | -1.092262000 |
| 6 | 2.576804000  | -2.483815000 | -1.101491000 |
| 1 | 1.877090000  | -2.731290000 | -1.889456000 |
| 8 | -0.044033000 | -2.018174000 | 1.395380000  |
| 1 | -4.998895000 | 1.572721000  | 0.037694000  |
| 1 | -4.347925000 | 0.091427000  | 1.959044000  |
| 1 | 5.749855000  | -2.968027000 | -0.020470000 |
| 1 | 4.203389000  | -3.623410000 | -1.894131000 |
| 1 | 0.878752000  | 1.330764000  | 3.180163000  |
| 1 | 1.440375000  | 1.019357000  | -3.193740000 |
| 1 | -0.870779000 | -2.527195000 | 1.297458000  |
| 6 | 1.430808000  | 2.971956000  | -1.453449000 |
| 6 | 1.788894000  | 4.188590000  | -0.589967000 |
| 6 | 2.807652000  | 3.790712000  | 0.484879000  |
| 6 | 2.224752000  | 2.689395000  | 1.380171000  |
| 1 | 3.725860000  | 3.430621000  | 0.002244000  |
| 1 | 3.074591000  | 4.654567000  | 1.103000000  |
| 1 | 2.191893000  | 4.978100000  | -1.233188000 |
| 1 | 0.884023000  | 4.581255000  | -0.107615000 |
| 1 | 2.341907000  | 2.622738000  | -1.948858000 |
| 1 | 0.701998000  | 3.234690000  | -2.226384000 |
| 1 | 2.939491000  | 2.385594000  | 2.151579000  |
| 1 | 1.335365000  | 3.087118000  | 1.878898000  |
| 1 | 2.739564000  | 1.066427000  | 0.075140000  |
| 1 | -0.061497000 | 2.205222000  | -0.111774000 |
| 1 | -3.528000000 | -2.032087000 | -1.283351000 |
| 1 | -2.795520000 | -2.092986000 | -1.397103000 |
| 7 | -6.045773000 | -1.748531000 | -0.783990000 |
| 6 | -6.613943000 | -1.034016000 | -0.066154000 |
| 6 | -7.321648000 | -0.132850000 | 0.834087000  |
| 1 | -6.665844000 | 0.146917000  | 1.665120000  |
| 1 | -7.622820000 | 0.769971000  | 0.292776000  |
| 1 | -8.213888000 | -0.628867000 | 1.230292000  |

**TS\_heter\_d** (G = -2546.604166) (doublet)

|    |              |              |              |
|----|--------------|--------------|--------------|
| 26 | -0.029864000 | -0.855953000 | 0.055900000  |
| 6  | -2.534559000 | 0.165270000  | 1.280690000  |
| 1  | -2.283849000 | -0.554465000 | 2.048657000  |
| 7  | -1.689808000 | 0.238177000  | 0.235137000  |
| 7  | 0.382827000  | 0.661105000  | -1.315050000 |
| 6  | -3.656158000 | 0.980183000  | 1.360071000  |
| 7  | 1.147605000  | 0.293305000  | 1.341125000  |
| 7  | 1.695894000  | -1.804145000 | -0.174929000 |
| 8  | -0.733463000 | -1.860275000 | -1.214523000 |
| 6  | -3.912984000 | 1.883651000  | 0.328672000  |
| 6  | -3.041394000 | 1.942800000  | -0.757732000 |
| 1  | -3.197887000 | 2.629701000  | -1.581498000 |
| 6  | -1.938427000 | 1.099582000  | -0.777978000 |
| 6  | -0.943845000 | 1.035997000  | -1.892154000 |
| 1  | -1.234616000 | 0.254700000  | -2.599318000 |
| 1  | -0.863929000 | 1.985511000  | -2.427079000 |
| 6  | 1.262252000  | 0.189617000  | -2.419728000 |
| 1  | 0.846983000  | -0.743225000 | -2.800153000 |
| 1  | 2.272894000  | 0.031196000  | -2.045810000 |
| 6  | 0.956842000  | 1.846742000  | -0.558754000 |
| 6  | 1.894177000  | 1.324286000  | 0.515150000  |
| 6  | 0.359555000  | 0.894750000  | 2.448726000  |
| 1  | -0.253745000 | 0.110648000  | 2.892523000  |
| 1  | -0.273925000 | 1.692232000  | 2.061181000  |
| 6  | 2.127678000  | -0.676459000 | 1.909818000  |
| 1  | 1.613341000  | -1.262447000 | 2.676619000  |
| 1  | 2.965059000  | -0.148780000 | 2.374148000  |

|   |              |              |              |
|---|--------------|--------------|--------------|
| 6 | 2.590198000  | -1.594126000 | 0.819595000  |
| 6 | 3.825105000  | -2.230666000 | 0.821434000  |
| 1 | 4.524427000  | -2.025274000 | 1.623822000  |
| 6 | 4.129321000  | -3.118018000 | -0.209875000 |
| 6 | 3.189400000  | -3.343794000 | -1.217427000 |
| 6 | 1.978133000  | -2.668832000 | -1.168967000 |
| 1 | 1.212432000  | -2.799683000 | -1.923114000 |
| 8 | -0.469869000 | -1.871189000 | 1.432898000  |
| 1 | -4.780861000 | 2.533559000  | 0.369342000  |
| 1 | -4.313442000 | 0.894422000  | 2.216884000  |
| 1 | 5.088122000  | -3.625776000 | -0.228084000 |
| 1 | 3.385389000  | -4.027489000 | -2.035060000 |
| 1 | 1.033805000  | 1.298667000  | 3.208635000  |
| 1 | 1.274224000  | 0.934956000  | -3.218973000 |
| 1 | -0.874624000 | -2.702813000 | 1.127411000  |
| 6 | 1.650388000  | 2.872796000  | -1.462960000 |
| 6 | 2.218129000  | 4.020870000  | -0.617233000 |
| 6 | 3.201275000  | 3.473258000  | 0.423672000  |
| 6 | 2.493844000  | 2.467945000  | 1.343211000  |
| 1 | 4.038224000  | 2.981461000  | -0.089669000 |
| 1 | 3.615237000  | 4.285858000  | 1.030058000  |
| 1 | 2.714572000  | 4.741148000  | -1.276194000 |
| 1 | 1.399779000  | 4.546347000  | -0.107292000 |
| 1 | 2.478782000  | 2.390948000  | -1.991202000 |
| 1 | 0.942191000  | 3.244862000  | -2.209973000 |
| 1 | 3.182479000  | 2.056966000  | 2.087899000  |
| 1 | 1.692620000  | 2.990511000  | 1.874886000  |
| 1 | 2.712340000  | 0.789515000  | 0.024323000  |
| 1 | 0.111380000  | 2.335118000  | -0.066412000 |
| 1 | -2.801660000 | -1.492126000 | -1.591169000 |
| 1 | -1.955820000 | -1.664253000 | -1.475362000 |
| 7 | -5.068868000 | -0.949622000 | -1.468727000 |
| 6 | -5.373938000 | -1.237525000 | -0.384922000 |
| 6 | -5.746106000 | -1.594483000 | 0.976746000  |
| 1 | -6.505804000 | -2.383114000 | 0.960137000  |
| 1 | -4.862168000 | -1.952061000 | 1.514729000  |
| 1 | -6.145676000 | -0.715132000 | 1.491483000  |

**II\_heter\_d** (G = -2546.704836) (doublet)

|    |              |              |              |
|----|--------------|--------------|--------------|
| 26 | -0.348997000 | -0.584192000 | 0.130344000  |
| 6  | -2.524364000 | 1.006469000  | 1.410518000  |
| 1  | -2.366298000 | 0.310751000  | 2.224498000  |
| 7  | -1.719502000 | 0.848540000  | 0.341993000  |
| 7  | 0.326694000  | 0.769098000  | -1.311180000 |
| 6  | -3.493676000 | 2.000404000  | 1.470141000  |
| 7  | 1.145296000  | 0.250137000  | 1.311036000  |
| 7  | 1.066586000  | -1.965590000 | -0.110120000 |
| 8  | -1.418734000 | -1.434764000 | -1.121909000 |
| 6  | -3.637180000 | 2.866522000  | 0.383605000  |
| 6  | -2.790634000 | 2.717367000  | -0.714115000 |
| 1  | -2.848337000 | 3.380367000  | -1.570561000 |
| 6  | -1.841118000 | 1.699563000  | -0.701426000 |
| 6  | -0.885679000 | 1.452999000  | -1.835610000 |
| 1  | -1.349326000 | 0.800248000  | -2.580958000 |
| 1  | -0.626436000 | 2.389382000  | -2.339663000 |
| 6  | 1.008156000  | 0.070575000  | -2.428240000 |
| 1  | 0.358338000  | -0.747377000 | -2.741249000 |
| 1  | 1.958797000  | -0.332585000 | -2.079384000 |
| 6  | 1.211351000  | 1.779496000  | -0.620002000 |
| 6  | 2.058922000  | 1.047972000  | 0.414297000  |
| 6  | 0.582064000  | 1.050155000  | 2.425354000  |
| 1  | -0.173460000 | 0.432682000  | 2.911143000  |
| 1  | 0.119140000  | 1.955038000  | 2.030687000  |
| 6  | 1.887963000  | -0.907525000 | 1.879033000  |
| 1  | 1.275987000  | -1.318097000 | 2.686063000  |
| 1  | 2.853601000  | -0.595853000 | 2.289307000  |
| 6  | 2.048083000  | -1.954679000 | 0.816023000  |
| 6  | 3.096849000  | -2.868747000 | 0.784488000  |
| 1  | 3.875793000  | -2.813955000 | 1.537394000  |
| 6  | 3.115860000  | -3.836758000 | -0.219387000 |
| 6  | 2.086078000  | -3.856287000 | -1.161936000 |
| 6  | 1.079181000  | -2.900720000 | -1.075175000 |
| 1  | 0.249320000  | -2.852992000 | -1.769793000 |
| 8  | -0.932915000 | -1.522394000 | 1.606677000  |
| 1  | -4.384958000 | 3.653242000  | 0.397729000  |
| 1  | -4.119432000 | 2.087055000  | 2.351206000  |
| 1  | 3.921992000  | -4.562481000 | -0.266136000 |
| 1  | 2.060755000  | -4.593732000 | -1.956701000 |
| 1  | 1.361415000  | 1.319913000  | 3.144882000  |
| 1  | 1.182657000  | 0.751399000  | -3.267127000 |
| 1  | -1.896485000 | -1.598981000 | 1.569388000  |
| 6  | 2.079369000  | 2.610507000  | -1.575745000 |
| 6  | 2.978008000  | 3.577044000  | -0.792937000 |
| 6  | 3.863833000  | 2.796465000  | 0.185378000  |
| 6  | 2.989303000  | 2.006642000  | 1.166878000  |

|   |              |              |              |
|---|--------------|--------------|--------------|
| 1 | 4.506629000  | 2.106341000  | -0.378002000 |
| 1 | 4.517722000  | 3.476541000  | 0.742658000  |
| 1 | 3.589836000  | 4.155291000  | -1.494203000 |
| 1 | 2.356998000  | 4.288184000  | -0.231102000 |
| 1 | 2.721524000  | 1.940253000  | -2.156628000 |
| 1 | 1.437383000  | 3.150604000  | -2.279432000 |
| 1 | 3.602688000  | 1.441182000  | 1.876310000  |
| 1 | 2.388427000  | 2.720342000  | 1.740026000  |
| 1 | 2.676084000  | 0.318966000  | -0.120039000 |
| 1 | 0.538193000  | 2.456735000  | -0.085058000 |
| 1 | -4.805390000 | 0.237312000  | -0.482226000 |
| 1 | -2.057991000 | -0.848731000 | -1.548340000 |
| 7 | -4.540121000 | -0.737056000 | -0.388568000 |
| 6 | -4.180268000 | -1.822716000 | -0.294237000 |
| 6 | -3.746446000 | -3.185998000 | -0.169618000 |
| 1 | -4.525477000 | -3.846742000 | -0.566865000 |
| 1 | -2.809327000 | -3.265739000 | -0.732758000 |
| 1 | -3.569840000 | -3.396711000 | 0.891977000  |

**II\_heter\_sext** (G = -2546.716803) (sextuplet)

|    |              |              |              |
|----|--------------|--------------|--------------|
| 26 | -0.375988000 | -0.837502000 | 0.279911000  |
| 6  | -2.714096000 | 0.817050000  | 1.527189000  |
| 1  | -2.478858000 | 0.161971000  | 2.358480000  |
| 7  | -1.912282000 | 0.692788000  | 0.455466000  |
| 7  | 0.119192000  | 0.749421000  | -1.322210000 |
| 6  | -3.773135000 | 1.718408000  | 1.554188000  |
| 7  | 1.192704000  | 0.432274000  | 1.307218000  |
| 7  | 1.489998000  | -1.887197000 | -0.045096000 |
| 8  | -1.310753000 | -1.872110000 | -0.970811000 |
| 6  | -3.998156000 | 2.518008000  | 0.430106000  |
| 6  | -3.157563000 | 2.392652000  | -0.676924000 |
| 1  | -3.292133000 | 3.000991000  | -1.564871000 |
| 6  | -2.123554000 | 1.459115000  | -0.631354000 |
| 6  | -1.205335000 | 1.201381000  | -1.798398000 |
| 1  | -1.637387000 | 0.398182000  | -2.405542000 |
| 1  | -1.128312000 | 2.092305000  | -2.432304000 |
| 6  | 0.868673000  | 0.128554000  | -2.434689000 |
| 1  | 0.376065000  | -0.804123000 | -2.714348000 |
| 1  | 1.884646000  | -0.099341000 | -2.110211000 |
| 6  | 0.861480000  | 1.883971000  | -0.679460000 |
| 6  | 1.880320000  | 1.335081000  | 0.325335000  |
| 6  | 0.539854000  | 1.160890000  | 2.419101000  |
| 1  | -0.097076000 | 0.453853000  | 2.952747000  |
| 1  | -0.074135000 | 1.966863000  | 2.015271000  |
| 6  | 2.147248000  | -0.557638000 | 1.857506000  |
| 1  | 1.648930000  | -1.057775000 | 2.694428000  |
| 1  | 3.056333000  | -0.074829000 | 2.234417000  |
| 6  | 2.483675000  | -1.593396000 | 0.815564000  |
| 6  | 3.717754000  | -2.236680000 | 0.751790000  |
| 1  | 4.501804000  | -1.963592000 | 1.449820000  |
| 6  | 3.913703000  | -3.219451000 | -0.218556000 |
| 6  | 2.873320000  | -3.529482000 | -1.097855000 |
| 6  | 1.673088000  | -2.837936000 | -0.976540000 |
| 1  | 0.822942000  | -3.027739000 | -1.622113000 |
| 8  | -0.813846000 | -1.611236000 | 1.913161000  |
| 1  | -4.812424000 | 3.236096000  | 0.419140000  |
| 1  | -4.401802000 | 1.791292000  | 2.434626000  |
| 1  | 4.866812000  | -3.734231000 | -0.290529000 |
| 1  | 2.987136000  | -4.287957000 | -1.864376000 |
| 1  | 1.279000000  | 1.582250000  | 3.110184000  |
| 1  | 0.908602000  | 0.784308000  | -3.312160000 |
| 1  | -1.322982000 | -2.435041000 | 1.892700000  |
| 6  | 1.527723000  | 2.829902000  | -1.692302000 |
| 6  | 2.282362000  | 3.961785000  | -0.985874000 |
| 6  | 3.340758000  | 3.374978000  | -0.045218000 |
| 6  | 2.670689000  | 2.470792000  | 0.995291000  |
| 1  | 4.066012000  | 2.794427000  | -0.631897000 |
| 1  | 3.893150000  | 4.173128000  | 0.463772000  |
| 1  | 2.746291000  | 4.615858000  | -1.732939000 |
| 1  | 1.578066000  | 4.572118000  | -0.404145000 |
| 1  | 2.247953000  | 2.265323000  | -2.295058000 |
| 1  | 0.768107000  | 3.229755000  | -2.372633000 |
| 1  | 3.411250000  | 2.044494000  | 1.680456000  |
| 1  | 1.984379000  | 3.084900000  | 1.588865000  |
| 1  | 2.588858000  | 0.709617000  | -0.226782000 |
| 1  | 0.120292000  | 2.458975000  | -0.115356000 |
| 1  | -4.526752000 | -0.242853000 | -0.683539000 |
| 1  | -1.301145000 | -1.727968000 | -1.926099000 |
| 7  | -4.232383000 | -1.207233000 | -0.599935000 |
| 6  | -3.773532000 | -2.259222000 | -0.530732000 |
| 6  | -3.438967000 | -3.654059000 | -0.392159000 |
| 1  | -4.368524000 | -4.206881000 | -0.211626000 |
| 1  | -2.950680000 | -3.993661000 | -1.309076000 |
| 1  | -2.750384000 | -3.767482000 | 0.450049000  |

**I\_homo\_d** (G = -2413.831448) (doublet)

|    |              |              |              |
|----|--------------|--------------|--------------|
| 26 | 0.003470000  | -1.182556000 | 0.081589000  |
| 6  | 2.659564000  | -1.698083000 | -1.140151000 |
| 1  | 2.072194000  | -2.222090000 | -1.882505000 |
| 7  | 1.972468000  | -1.104386000 | -0.147292000 |
| 7  | 0.417452000  | 0.463109000  | 1.328057000  |
| 6  | 4.044951000  | -1.623971000 | -1.202113000 |
| 7  | -0.398259000 | 0.432928000  | -1.312806000 |
| 7  | -1.994341000 | -1.068579000 | 0.182849000  |
| 8  | 0.094894000  | -2.079624000 | 1.376544000  |
| 6  | 4.729940000  | -0.918626000 | -0.211838000 |
| 6  | 4.009974000  | -0.312598000 | 0.817199000  |
| 1  | 4.500246000  | 0.247563000  | 1.605122000  |
| 6  | 2.626597000  | -0.433415000 | 0.829655000  |
| 6  | 1.752597000  | 0.122879000  | 1.911280000  |
| 1  | 1.599310000  | -0.633915000 | 2.686222000  |
| 1  | 2.194353000  | 1.009486000  | 2.372565000  |
| 6  | -0.588910000 | 0.573370000  | 2.421389000  |
| 1  | -0.712487000 | -0.407745000 | 2.877710000  |
| 1  | -1.537104000 | 0.919610000  | 2.012065000  |
| 6  | 0.545993000  | 1.737490000  | 0.523836000  |
| 6  | -0.519220000 | 1.729296000  | -0.556660000 |
| 6  | 0.627474000  | 0.479877000  | -2.389930000 |
| 1  | 0.755546000  | -0.529285000 | -2.778066000 |
| 1  | 1.570004000  | 0.850802000  | -1.989400000 |
| 6  | -1.719769000 | 0.092240000  | -1.910902000 |
| 1  | -1.564284000 | -0.675990000 | -2.673959000 |
| 1  | -2.152382000 | 0.968718000  | -2.400442000 |
| 6  | -2.620763000 | -0.428202000 | -0.832336000 |
| 6  | -4.003659000 | -0.295579000 | -0.859956000 |
| 1  | -4.466502000 | 0.239459000  | -1.681259000 |
| 6  | -4.757176000 | -0.852917000 | 0.171302000  |
| 6  | -4.103630000 | -1.522162000 | 1.207057000  |
| 6  | -2.719016000 | -1.610756000 | 1.182300000  |
| 1  | -2.162667000 | -2.109007000 | 1.965979000  |
| 8  | -0.115497000 | -2.249350000 | -1.320679000 |
| 1  | 5.811627000  | -0.837768000 | -0.242072000 |
| 1  | 4.567137000  | -2.109313000 | -2.018300000 |
| 1  | -5.838403000 | -0.761488000 | 0.169739000  |
| 1  | -4.649727000 | -1.968639000 | 2.029823000  |
| 1  | 0.285901000  | 1.137948000  | -3.193798000 |
| 1  | -0.229370000 | 1.279561000  | 3.173602000  |
| 1  | -1.033222000 | -2.500073000 | -1.533625000 |
| 6  | 0.473133000  | 3.014940000  | 1.373255000  |
| 6  | 0.596748000  | 4.250128000  | 0.471971000  |
| 6  | -0.520186000 | 4.247390000  | -0.578835000 |
| 6  | -0.427821000 | 2.981809000  | -1.440389000 |
| 1  | -1.494870000 | 4.284223000  | -0.074527000 |
| 1  | -0.446839000 | 5.128643000  | -1.224896000 |
| 1  | 0.544421000  | 5.151736000  | 1.091503000  |
| 1  | 1.572414000  | 4.247757000  | -0.031680000 |
| 1  | -0.493218000 | 3.058909000  | 1.884032000  |
| 1  | 1.260757000  | 2.997075000  | 2.132659000  |
| 1  | -1.221453000 | 2.956388000  | -2.193425000 |
| 1  | 0.534635000  | 2.989245000  | -1.960833000 |
| 1  | -1.499330000 | 1.718125000  | -0.070918000 |
| 1  | 1.526240000  | 1.699765000  | 0.041231000  |
| 1  | 0.127059000  | -4.265099000 | -0.150781000 |
| 1  | 0.152440000  | -4.746511000 | 0.417555000  |

**TS\_homo\_d** (G = -2413.826956) (doublet)

|    |              |              |              |
|----|--------------|--------------|--------------|
| 26 | 0.016409000  | -1.134914000 | 0.068655000  |
| 6  | 2.669031000  | -1.642125000 | -1.164911000 |
| 1  | 2.082215000  | -2.155235000 | -1.915276000 |
| 7  | 1.980475000  | -1.055240000 | -0.168256000 |
| 7  | 0.415702000  | 0.447922000  | 1.337885000  |
| 6  | 4.054978000  | -1.579015000 | -1.218126000 |
| 7  | -0.397917000 | 0.404503000  | -1.322466000 |
| 7  | -1.980859000 | -1.056825000 | 0.186727000  |
| 8  | 0.136755000  | -2.177906000 | 1.334703000  |
| 6  | 4.739771000  | -0.893330000 | -0.213440000 |
| 6  | 4.019329000  | -0.299007000 | 0.821967000  |
| 1  | 4.510370000  | 0.241830000  | 1.622828000  |
| 6  | 2.634805000  | -0.408460000 | 0.824434000  |
| 6  | 1.757533000  | 0.127305000  | 1.914071000  |
| 1  | 1.618875000  | -0.642139000 | 2.679935000  |
| 1  | 2.190198000  | 1.013441000  | 2.385071000  |
| 6  | -0.579924000 | 0.544705000  | 2.440599000  |
| 1  | -0.691335000 | -0.443645000 | 2.886341000  |
| 1  | -1.535155000 | 0.884680000  | 2.042044000  |
| 6  | 0.524472000  | 1.727895000  | 0.528446000  |
| 6  | -0.536555000 | 1.704157000  | -0.558307000 |
| 6  | 0.619107000  | 0.471756000  | -2.407565000 |

|   |              |              |              |
|---|--------------|--------------|--------------|
| 1 | 0.760854000  | -0.536470000 | -2.795700000 |
| 1 | 1.558127000  | 0.856905000  | -2.012317000 |
| 6 | -1.715027000 | 0.049335000  | -1.926774000 |
| 1 | -1.548705000 | -0.740120000 | -2.666627000 |
| 1 | -2.143908000 | 0.912338000  | -2.442608000 |
| 6 | -2.618350000 | -0.452827000 | -0.842903000 |
| 6 | -4.003035000 | -0.345118000 | -0.874906000 |
| 1 | -4.475729000 | 0.161251000  | -1.708640000 |
| 6 | -4.745769000 | -0.892197000 | 0.169998000  |
| 6 | -4.080558000 | -1.528811000 | 1.218986000  |
| 6 | -2.694214000 | -1.593783000 | 1.196081000  |
| 1 | -2.126512000 | -2.072180000 | 1.983628000  |
| 8 | -0.098880000 | -2.373567000 | -1.237287000 |
| 1 | 5.822280000  | -0.820957000 | -0.236499000 |
| 1 | 4.578514000  | -2.057545000 | -2.037486000 |
| 1 | -5.828501000 | -0.820147000 | 0.167322000  |
| 1 | -4.619501000 | -1.969199000 | 2.049753000  |
| 1 | 0.262318000  | 1.122650000  | -3.210176000 |
| 1 | -0.223641000 | 1.245987000  | 3.199035000  |
| 1 | -1.017298000 | -2.605856000 | -1.471247000 |
| 6 | 0.433408000  | 3.003693000  | 1.375255000  |
| 6 | 0.537176000  | 4.241640000  | 0.474726000  |
| 6 | -0.577325000 | 4.221132000  | -0.578597000 |
| 6 | -0.464218000 | 2.956734000  | -1.440554000 |
| 1 | -1.553483000 | 4.242319000  | -0.076076000 |
| 1 | -0.517031000 | 5.103974000  | -1.223910000 |
| 1 | 0.469248000  | 5.142978000  | 1.093164000  |
| 1 | 1.513570000  | 4.255273000  | -0.027532000 |
| 1 | -0.533054000 | 3.031999000  | 1.887639000  |
| 1 | 1.221391000  | 2.998788000  | 2.134677000  |
| 1 | -1.255808000 | 2.920281000  | -2.195370000 |
| 1 | 0.498988000  | 2.979442000  | -1.959681000 |
| 1 | -1.517236000 | 1.675185000  | -0.074614000 |
| 1 | 1.505807000  | 1.701723000  | 0.046737000  |
| 1 | 0.120545000  | -3.755091000 | -0.078001000 |
| 1 | 0.174328000  | -3.617506000 | 0.721122000  |

**II\_homo\_d** (G = -2413.965275) (doublet)

|    |              |              |              |
|----|--------------|--------------|--------------|
| 26 | 0.004816000  | -1.060893000 | 0.065101000  |
| 6  | 2.664667000  | -1.623146000 | -1.181702000 |
| 1  | 2.085623000  | -2.089727000 | -1.969303000 |
| 7  | 1.975086000  | -1.047129000 | -0.179235000 |
| 7  | 0.438877000  | 0.440730000  | 1.327043000  |
| 6  | 4.053100000  | -1.610379000 | -1.221275000 |
| 7  | -0.414677000 | 0.404210000  | -1.330100000 |
| 7  | -1.982954000 | -1.040947000 | 0.216214000  |
| 8  | 0.215588000  | -2.281298000 | 1.387415000  |
| 6  | 4.749747000  | -0.976182000 | -0.191330000 |
| 6  | 4.034459000  | -0.382569000 | 0.847588000  |
| 1  | 4.533262000  | 0.124411000  | 1.665914000  |
| 6  | 2.645996000  | -0.446436000 | 0.828451000  |
| 6  | 1.770475000  | 0.102847000  | 1.912711000  |
| 1  | 1.609444000  | -0.670070000 | 2.668245000  |
| 1  | 2.213047000  | 0.980428000  | 2.391719000  |
| 6  | -0.550281000 | 0.548834000  | 2.432591000  |
| 1  | -0.673144000 | -0.446482000 | 2.857524000  |
| 1  | -1.500359000 | 0.909897000  | 2.039734000  |
| 6  | 0.554938000  | 1.716472000  | 0.513558000  |
| 6  | -0.523112000 | 1.705974000  | -0.563090000 |
| 6  | 0.579043000  | 0.467462000  | -2.434973000 |
| 1  | 0.707350000  | -0.539565000 | -2.833014000 |
| 1  | 1.530233000  | 0.838963000  | -2.055428000 |
| 6  | -1.744671000 | 0.056598000  | -1.909230000 |
| 1  | -1.593928000 | -0.730621000 | -2.655665000 |
| 1  | -2.185588000 | 0.917676000  | -2.419397000 |
| 6  | -2.635264000 | -0.448991000 | -0.812140000 |
| 6  | -4.021446000 | -0.347567000 | -0.839702000 |
| 1  | -4.501704000 | 0.147071000  | -1.676407000 |
| 6  | -4.757280000 | -0.883883000 | 0.215492000  |
| 6  | -4.081795000 | -1.498040000 | 1.271506000  |
| 6  | -2.695003000 | -1.553067000 | 1.239724000  |
| 1  | -2.123224000 | -2.000885000 | 2.042218000  |
| 8  | -0.235210000 | -2.487103000 | -1.331290000 |
| 1  | 5.834458000  | -0.941196000 | -0.199385000 |
| 1  | 4.568787000  | -2.084163000 | -2.048486000 |
| 1  | -5.840486000 | -0.817278000 | 0.217542000  |
| 1  | -4.613740000 | -1.923765000 | 2.114530000  |
| 1  | 0.218353000  | 1.123578000  | -3.232045000 |
| 1  | -0.182590000 | 1.235267000  | 3.199881000  |
| 1  | -1.146844000 | -2.790281000 | -1.497154000 |
| 6  | 0.496401000  | 2.996507000  | 1.355226000  |
| 6  | 0.595609000  | 4.234298000  | 0.454157000  |
| 6  | -0.537980000 | 4.225172000  | -0.579374000 |
| 6  | -0.452659000 | 2.959536000  | -1.442366000 |

|   |              |              |              |
|---|--------------|--------------|--------------|
| 1 | -1.504482000 | 4.255210000  | -0.058542000 |
| 1 | -0.481669000 | 5.108822000  | -1.224244000 |
| 1 | 0.548590000  | 5.137280000  | 1.072494000  |
| 1 | 1.562467000  | 4.238505000  | -0.066797000 |
| 1 | -0.459032000 | 3.036719000  | 1.887835000  |
| 1 | 1.298184000  | 2.983909000  | 2.100371000  |
| 1 | -1.256068000 | 2.932203000  | -2.185519000 |
| 1 | 0.501793000  | 2.973840000  | -1.978303000 |
| 1 | -1.496628000 | 1.686302000  | -0.063723000 |
| 1 | 1.527935000  | 1.671626000  | 0.015955000  |
| 1 | 0.292385000  | -3.290375000 | -1.166001000 |
| 1 | -0.424674000 | -3.005536000 | 1.301440000  |

**II\_homo\_q** (G = -2413.960599) (quartet)

|    |              |              |              |
|----|--------------|--------------|--------------|
| 26 | -0.008582000 | -1.123038000 | 0.091868000  |
| 6  | 2.730369000  | -1.641610000 | -1.097115000 |
| 1  | 2.160244000  | -2.160776000 | -1.857547000 |
| 7  | 2.024904000  | -1.032906000 | -0.124912000 |
| 7  | 0.478748000  | 0.582003000  | 1.375703000  |
| 6  | 4.118112000  | -1.601679000 | -1.134412000 |
| 7  | -0.424178000 | 0.346435000  | -1.311132000 |
| 7  | -2.004447000 | -1.090581000 | 0.277447000  |
| 8  | 0.289303000  | -2.419306000 | 1.301531000  |
| 6  | 4.795665000  | -0.899329000 | -0.136030000 |
| 6  | 4.062190000  | -0.268524000 | 0.866715000  |
| 1  | 4.546313000  | 0.295256000  | 1.656563000  |
| 6  | 2.673677000  | -0.364366000 | 0.852122000  |
| 6  | 1.809611000  | 0.242465000  | 1.925813000  |
| 1  | 1.662631000  | -0.499441000 | 2.716984000  |
| 1  | 2.295923000  | 1.121311000  | 2.363347000  |
| 6  | -0.507896000 | 0.704974000  | 2.472338000  |
| 1  | -0.610877000 | -0.274266000 | 2.944127000  |
| 1  | -1.471128000 | 1.014173000  | 2.064407000  |
| 6  | 0.552979000  | 1.785862000  | 0.481461000  |
| 6  | -0.545320000 | 1.679789000  | -0.579252000 |
| 6  | 0.567551000  | 0.389513000  | -2.420563000 |
| 1  | 0.709056000  | -0.627036000 | -2.788082000 |
| 1  | 1.512594000  | 0.785462000  | -2.051025000 |
| 6  | -1.756856000 | -0.029372000 | -1.875108000 |
| 1  | -1.602811000 | -0.826456000 | -2.609611000 |
| 1  | -2.205089000 | 0.816070000  | -2.403446000 |
| 6  | -2.647779000 | -0.512005000 | -0.767445000 |
| 6  | -4.031252000 | -0.386332000 | -0.790873000 |
| 1  | -4.507992000 | 0.093850000  | -1.637752000 |
| 6  | -4.770950000 | -0.875008000 | 0.285200000  |
| 6  | -4.104157000 | -1.460569000 | 1.363270000  |
| 6  | -2.719993000 | -1.546549000 | 1.326485000  |
| 1  | -2.161947000 | -1.965978000 | 2.154766000  |
| 8  | -0.170967000 | -2.635323000 | -1.533843000 |
| 1  | 5.879333000  | -0.839139000 | -0.142442000 |
| 1  | 4.647581000  | -2.104793000 | -1.935313000 |
| 1  | -5.852617000 | -0.787447000 | 0.289088000  |
| 1  | -4.641028000 | -1.838799000 | 2.225399000  |
| 1  | 0.196058000  | 1.016321000  | -3.235828000 |
| 1  | -0.177514000 | 1.433516000  | 3.220201000  |
| 1  | -1.066504000 | -2.855376000 | -1.842086000 |
| 6  | 0.476675000  | 3.118725000  | 1.239618000  |
| 6  | 0.509976000  | 4.306330000  | 0.271188000  |
| 6  | -0.649076000 | 4.196526000  | -0.725883000 |
| 6  | -0.536279000 | 2.889750000  | -1.522339000 |
| 1  | -1.602103000 | 4.218982000  | -0.180335000 |
| 1  | -0.645290000 | 5.043074000  | -1.421089000 |
| 1  | 0.446270000  | 5.242064000  | 0.837447000  |
| 1  | 1.461650000  | 4.314469000  | -0.277166000 |
| 1  | -0.463294000 | 3.160545000  | 1.799720000  |
| 1  | 1.299226000  | 3.167473000  | 1.961105000  |
| 1  | -1.351810000 | 2.802054000  | -2.247129000 |
| 1  | 0.406906000  | 2.910133000  | -2.077740000 |
| 1  | -1.509043000 | 1.649358000  | -0.061747000 |
| 1  | 1.519237000  | 1.735891000  | -0.030314000 |
| 1  | 0.213135000  | -3.474446000 | -1.226722000 |
| 1  | -0.499360000 | -2.936223000 | 1.531274000  |

**II\_homo\_sext** (G = -2413.968425) (sextuplet)

|    |              |              |              |
|----|--------------|--------------|--------------|
| 26 | 0.003090000  | -1.224321000 | 0.128468000  |
| 6  | 2.840739000  | -1.629136000 | -1.150053000 |
| 1  | 2.280744000  | -2.163450000 | -1.908161000 |
| 7  | 2.118703000  | -1.072360000 | -0.159624000 |
| 7  | 0.513371000  | 0.472229000  | 1.360754000  |
| 6  | 4.224909000  | -1.519571000 | -1.201059000 |
| 7  | -0.483225000 | 0.388499000  | -1.341358000 |

|   |              |              |              |
|---|--------------|--------------|--------------|
| 7 | -2.139494000 | -1.019049000 | 0.232837000  |
| 8 | 0.074736000  | -2.526414000 | 1.387163000  |
| 6 | 4.878341000  | -0.806304000 | -0.193676000 |
| 6 | 4.128584000  | -0.231299000 | 0.831695000  |
| 1 | 4.595885000  | 0.336601000  | 1.628597000  |
| 6 | 2.746523000  | -0.391235000 | 0.823203000  |
| 6 | 1.856143000  | 0.147646000  | 1.912420000  |
| 1 | 1.721146000  | -0.624931000 | 2.676715000  |
| 1 | 2.303911000  | 1.025904000  | 2.387832000  |
| 6 | -0.470713000 | 0.576303000  | 2.469409000  |
| 1 | -0.587713000 | -0.416549000 | 2.907569000  |
| 1 | -1.428159000 | 0.916072000  | 2.073802000  |
| 6 | 0.584630000  | 1.706818000  | 0.496195000  |
| 6 | -0.534446000 | 1.679403000  | -0.551689000 |
| 6 | 0.509605000  | 0.427216000  | -2.445252000 |
| 1 | 0.637881000  | -0.582057000 | -2.841176000 |
| 1 | 1.467175000  | 0.782575000  | -2.064616000 |
| 6 | -1.829972000 | 0.093912000  | -1.892564000 |
| 1 | -1.734203000 | -0.680332000 | -2.662451000 |
| 1 | -2.256902000 | 0.972587000  | -2.386569000 |
| 6 | -2.742932000 | -0.392841000 | -0.798294000 |
| 6 | -4.123693000 | -0.221722000 | -0.843361000 |
| 1 | -4.570036000 | 0.299143000  | -1.683299000 |
| 6 | -4.897935000 | -0.719657000 | 0.203134000  |
| 6 | -4.269062000 | -1.365179000 | 1.270667000  |
| 6 | -2.886996000 | -1.493901000 | 1.248468000  |
| 1 | -2.348715000 | -1.966969000 | 2.061016000  |
| 8 | -0.089380000 | -2.602540000 | -1.492654000 |
| 1 | 5.957785000  | -0.693852000 | -0.210312000 |
| 1 | 4.771921000  | -1.979252000 | -2.016265000 |
| 1 | -5.976241000 | -0.596326000 | 0.192342000  |
| 1 | -4.833942000 | -1.756917000 | 2.108820000  |
| 1 | 0.172047000  | 1.083675000  | -3.253432000 |
| 1 | -0.119076000 | 1.275201000  | 3.234398000  |
| 1 | -0.652099000 | -2.494067000 | -2.278546000 |
| 6 | 0.551819000  | 3.007039000  | 1.312719000  |
| 6 | 0.623732000  | 4.234940000  | 0.398674000  |
| 6 | -0.543223000 | 4.211646000  | -0.595035000 |
| 6 | -0.486160000 | 2.932861000  | -1.438784000 |
| 1 | -1.491750000 | 4.250385000  | -0.042447000 |
| 1 | -0.509262000 | 5.084771000  | -1.255932000 |
| 1 | 0.597759000  | 5.145056000  | 1.008112000  |
| 1 | 1.572834000  | 4.232698000  | -0.154194000 |
| 1 | -0.386076000 | 3.053939000  | 1.875813000  |
| 1 | 1.375631000  | 3.001545000  | 2.033959000  |
| 1 | -1.310262000 | 2.902834000  | -2.158603000 |
| 1 | 0.451311000  | 2.937743000  | -2.004598000 |
| 1 | -1.489051000 | 1.670430000  | -0.016822000 |
| 1 | 1.540568000  | 1.654638000  | -0.033326000 |
| 1 | -0.146535000 | -3.537432000 | -1.228406000 |
| 1 | -0.594633000 | -3.136551000 | 1.724725000  |

**[Fe<sup>III</sup>(OO)(OCH<sub>3</sub>)(BPMCNCN)]<sup>2+</sup> (G = -2565.365982)  
(quartet)**

|    |              |              |              |
|----|--------------|--------------|--------------|
| 26 | 0.037511000  | -0.704927000 | 0.125734000  |
| 6  | 2.964660000  | -0.993139000 | -1.105628000 |
| 1  | 2.464684000  | -1.588781000 | -1.861533000 |
| 7  | 2.179307000  | -0.441415000 | -0.164095000 |
| 7  | 0.409440000  | 0.950485000  | 1.315743000  |
| 6  | 4.341923000  | -0.806578000 | -1.116389000 |
| 7  | -0.554144000 | 0.612355000  | -1.305508000 |
| 7  | -2.069408000 | -0.875843000 | 0.302053000  |
| 8  | 0.336864000  | -1.878931000 | 1.472430000  |
| 6  | 4.917620000  | -0.014860000 | -0.119475000 |
| 6  | 4.101481000  | 0.551911000  | 0.858465000  |
| 1  | 4.506896000  | 1.173299000  | 1.649608000  |
| 6  | 2.732276000  | 0.304830000  | 0.811017000  |
| 6  | 1.782976000  | 0.803081000  | 1.870844000  |
| 1  | 1.736548000  | 0.067264000  | 2.680242000  |
| 1  | 2.125547000  | 1.752872000  | 2.291727000  |
| 6  | -0.576357000 | 0.986938000  | 2.431003000  |
| 1  | -0.576806000 | 0.010317000  | 2.919352000  |
| 1  | -1.568226000 | 1.197672000  | 2.031926000  |
| 6  | 0.337692000  | 2.163869000  | 0.410800000  |
| 6  | -0.772280000 | 1.951115000  | -0.614023000 |
| 6  | 0.436761000  | 0.686292000  | -2.418406000 |
| 1  | 0.659454000  | -0.330558000 | -2.744469000 |
| 1  | 1.346462000  | 1.172176000  | -2.070929000 |
| 6  | -1.848683000 | 0.108396000  | -1.869895000 |
| 1  | -1.612665000 | -0.723581000 | -2.541447000 |
| 1  | -2.328372000 | 0.895518000  | -2.457234000 |
| 6  | -2.735027000 | -0.384827000 | -0.762576000 |
| 6  | -4.123946000 | -0.387574000 | -0.821119000 |
| 1  | -4.628071000 | 0.028901000  | -1.686004000 |

|   |              |              |              |
|---|--------------|--------------|--------------|
| 6 | -4.833034000 | -0.932881000 | 0.249947000  |
| 6 | -4.136905000 | -1.452792000 | 1.344283000  |
| 6 | -2.748021000 | -1.403601000 | 1.335831000  |
| 1 | -2.148147000 | -1.779948000 | 2.156904000  |
| 8 | 0.114172000  | -2.327892000 | -1.030203000 |
| 1 | 5.988701000  | 0.160506000  | -0.106063000 |
| 1 | 4.943306000  | -1.266315000 | -1.892434000 |
| 1 | -5.918212000 | -0.948476000 | 0.232716000  |
| 1 | -4.656847000 | -1.883438000 | 2.192363000  |
| 1 | 0.010495000  | 1.247003000  | -3.254261000 |
| 1 | -0.297969000 | 1.755249000  | 3.157457000  |
| 6 | 0.154203000  | 3.484384000  | 1.168368000  |
| 6 | 0.075517000  | 4.657823000  | 0.182157000  |
| 6 | -1.075661000 | 4.441166000  | -0.806582000 |
| 6 | -0.868126000 | 3.134234000  | -1.584754000 |
| 1 | -2.025612000 | 4.397892000  | -0.257385000 |
| 1 | -1.139492000 | 5.275125000  | -1.513700000 |
| 1 | -0.064304000 | 5.590475000  | 0.739288000  |
| 1 | 1.020218000  | 4.740032000  | -0.371742000 |
| 1 | -0.779340000 | 3.447666000  | 1.739227000  |
| 1 | 0.978556000  | 3.616133000  | 1.876311000  |
| 1 | -1.683760000 | 2.965566000  | -2.294500000 |
| 1 | 0.064699000  | 3.214794000  | -2.152246000 |
| 1 | -1.721404000 | 1.860071000  | -0.076957000 |
| 1 | 1.292432000  | 2.200002000  | -0.121737000 |
| 6 | 0.360766000  | -3.337402000 | -0.331632000 |
| 8 | 0.512327000  | -3.252619000 | 0.969426000  |
| 6 | 0.506214000  | -4.706294000 | -0.894842000 |
| 1 | 1.306388000  | -4.680682000 | -1.642573000 |
| 1 | 0.731374000  | -5.442876000 | -0.122494000 |
| 1 | -0.429388000 | -4.963854000 | -1.403460000 |

**I\_homo\_AcO\_q (G = -2566.541447) (quartet)**

|    |              |              |              |
|----|--------------|--------------|--------------|
| 26 | 0.371045000  | 0.635376000  | 0.297688000  |
| 6  | -1.422962000 | 2.719484000  | -0.850143000 |
| 1  | -0.583523000 | 2.889865000  | -1.511186000 |
| 7  | -1.289205000 | 1.729862000  | 0.052401000  |
| 7  | -1.003861000 | -0.571667000 | 1.274055000  |
| 6  | -2.584816000 | 3.476959000  | -0.913284000 |
| 7  | -0.012642000 | -0.653305000 | -1.342945000 |
| 7  | 1.912690000  | -0.582215000 | 0.457844000  |
| 8  | 0.730286000  | 1.419612000  | 1.692680000  |
| 6  | -3.622594000 | 3.203910000  | -0.021062000 |
| 6  | -3.468227000 | 2.182646000  | 0.915963000  |
| 1  | -4.249378000 | 1.932128000  | 1.624372000  |
| 6  | -2.278985000 | 1.466427000  | 0.936280000  |
| 6  | -1.962677000 | 0.382175000  | 1.915885000  |
| 1  | -1.471079000 | 0.808922000  | 2.794926000  |
| 1  | -2.858363000 | -0.153335000 | 2.240287000  |
| 6  | -0.354065000 | -1.386305000 | 2.339910000  |
| 1  | 0.249081000  | -0.722136000 | 2.957546000  |
| 1  | 0.264656000  | -2.157881000 | 1.884839000  |
| 6  | -1.734138000 | -1.417026000 | 0.241731000  |
| 6  | -0.736845000 | -1.873644000 | -0.811124000 |
| 6  | -0.743990000 | 0.022081000  | -2.447082000 |
| 1  | -0.234210000 | 0.959733000  | -2.666446000 |
| 1  | -1.772879000 | 0.213724000  | -2.145260000 |
| 6  | 1.336732000  | -1.051667000 | -1.832720000 |
| 1  | 1.741682000  | -0.221234000 | -2.418551000 |
| 1  | 1.272979000  | -1.933271000 | -2.475930000 |
| 6  | 2.224489000  | -1.292297000 | -0.653403000 |
| 6  | 3.323595000  | -2.140557000 | -0.672110000 |
| 1  | 3.535922000  | -2.708516000 | -1.570643000 |
| 6  | 4.123613000  | -2.235911000 | 0.465460000  |
| 6  | 3.804696000  | -1.477971000 | 1.594334000  |
| 6  | 2.691911000  | -0.652917000 | 1.557585000  |
| 1  | 2.399374000  | -0.038489000 | 2.398314000  |
| 8  | 1.274593000  | 1.686197000  | -0.880112000 |
| 1  | -4.542549000 | 3.778105000  | -0.055444000 |
| 1  | -2.663495000 | 4.264153000  | -1.653996000 |
| 1  | 4.986508000  | -2.893907000 | 0.471511000  |
| 1  | 4.405352000  | -1.518510000 | 2.495287000  |
| 1  | -0.735534000 | -0.608273000 | -3.340239000 |
| 1  | -1.126911000 | -1.847941000 | 2.959020000  |
| 6  | -2.486274000 | -2.604171000 | 0.857377000  |
| 6  | -3.185443000 | -3.408764000 | -0.246139000 |
| 6  | -2.155890000 | -3.905738000 | -1.267068000 |
| 6  | -1.419907000 | -2.716076000 | -1.897719000 |
| 1  | -1.435365000 | -4.565564000 | -0.765779000 |
| 1  | -2.643679000 | -4.486505000 | -2.057133000 |
| 1  | -3.717777000 | -4.250863000 | 0.208717000  |
| 1  | -3.928751000 | -2.778262000 | -0.751570000 |
| 1  | -1.775073000 | -3.262001000 | 1.365821000  |
| 1  | -3.205702000 | -2.241159000 | 1.597744000  |
| 1  | -0.671346000 | -3.052173000 | -2.621891000 |

|   |              |              |              |
|---|--------------|--------------|--------------|
| 1 | -2.151804000 | -2.099137000 | -2.428484000 |
| 1 | 0.019140000  | -2.492324000 | -0.318459000 |
| 1 | -2.462871000 | -0.755479000 | -0.234442000 |
| 6 | 2.405597000  | 2.381814000  | -0.630979000 |
| 8 | 3.072628000  | 2.254703000  | 0.374683000  |
| 6 | 2.728786000  | 3.305393000  | -1.780152000 |
| 1 | 1.909564000  | 4.020963000  | -1.912680000 |
| 1 | 3.661684000  | 3.834857000  | -1.576827000 |
| 1 | 2.817198000  | 2.725344000  | -2.705041000 |
| 1 | 0.209675000  | 1.303959000  | 4.902941000  |
| 1 | 0.345751000  | 1.325548000  | 4.172062000  |

**TS\_homo\_AcO\_q** (G = -2566.508244) (quartet)

|    |              |              |              |
|----|--------------|--------------|--------------|
| 26 | -0.244925000 | 0.665514000  | -0.454502000 |
| 6  | 1.630671000  | 2.685330000  | 0.678338000  |
| 1  | 0.774172000  | 2.961038000  | 1.278049000  |
| 7  | 1.462965000  | 1.650135000  | -0.167209000 |
| 7  | 1.059069000  | -0.686894000 | -1.270780000 |
| 6  | 2.842405000  | 3.357224000  | 0.762522000  |
| 7  | -0.076824000 | -0.513461000 | 1.280301000  |
| 7  | -1.878331000 | -0.438066000 | -0.627294000 |
| 8  | -0.428167000 | 1.420079000  | -1.978111000 |
| 6  | 3.902893000  | 2.948176000  | -0.047690000 |
| 6  | 3.718325000  | 1.881300000  | -0.926361000 |
| 1  | 4.514005000  | 1.526602000  | -1.571484000 |
| 6  | 2.478698000  | 1.257860000  | -0.970811000 |
| 6  | 2.137606000  | 0.137005000  | -1.899656000 |
| 1  | 1.749408000  | 0.541683000  | -2.838830000 |
| 1  | 3.005291000  | -0.488751000 | -2.122057000 |
| 6  | 0.413799000  | -1.516703000 | -2.327723000 |
| 1  | -0.098012000 | -0.846577000 | -3.016979000 |
| 1  | -0.291043000 | -2.209180000 | -1.870923000 |
| 6  | 1.658179000  | -1.524539000 | -0.146429000 |
| 6  | 0.570579000  | -1.821906000 | 0.871275000  |
| 6  | 0.648447000  | 0.172677000  | 2.383044000  |
| 1  | 0.206039000  | 1.159747000  | 2.512950000  |
| 1  | 1.704418000  | 0.262730000  | 2.131776000  |
| 6  | -1.476058000 | -0.772457000 | 1.721738000  |
| 1  | -1.838184000 | 0.108067000  | 2.257019000  |
| 1  | -1.506573000 | -1.620440000 | 2.411353000  |
| 6  | -2.322089000 | -1.019854000 | 0.512849000  |
| 6  | -3.486398000 | -1.776995000 | 0.531742000  |
| 1  | -3.802072000 | -2.238380000 | 1.460455000  |
| 6  | -4.212814000 | -1.927631000 | -0.647850000 |
| 6  | -3.748177000 | -1.322814000 | -1.817532000 |
| 6  | -2.577379000 | -0.582613000 | -1.771881000 |
| 1  | -2.180355000 | -0.086239000 | -2.646371000 |
| 8  | -1.136761000 | 1.938105000  | 0.603646000  |
| 1  | 4.862246000  | 3.452376000  | 0.005294000  |
| 1  | 2.943261000  | 4.184033000  | 1.455807000  |
| 1  | -5.125723000 | -2.514068000 | -0.656610000 |
| 1  | -4.280812000 | -1.416792000 | -2.756533000 |
| 1  | 0.538013000  | -0.397499000 | 3.309161000  |
| 1  | 1.183554000  | -2.071054000 | -2.869590000 |
| 6  | 2.336629000  | -2.811769000 | -0.636300000 |
| 6  | 2.893036000  | -3.600202000 | 0.557572000  |
| 6  | 1.767960000  | -3.929471000 | 1.545092000  |
| 6  | 1.117633000  | -2.635384000 | 2.050728000  |
| 1  | 1.014479000  | -4.553522000 | 1.046429000  |
| 1  | 2.156327000  | -4.495629000 | 2.398307000  |
| 1  | 3.366805000  | -4.516395000 | 0.189490000  |
| 1  | 3.664722000  | -3.007986000 | 1.067086000  |
| 1  | 1.600881000  | -3.438328000 | -1.149298000 |
| 1  | 3.128365000  | -2.561581000 | -1.348766000 |
| 1  | 0.307526000  | -2.848565000 | 2.755263000  |
| 1  | 1.878326000  | -2.049351000 | 2.575681000  |
| 1  | -0.207167000 | -2.412396000 | 0.378673000  |
| 1  | 2.412490000  | -0.893885000 | 0.331236000  |
| 6  | -2.367235000 | 2.332668000  | 0.790162000  |
| 8  | -3.277701000 | 2.243880000  | -0.047807000 |
| 6  | -2.622768000 | 2.936359000  | 2.148550000  |
| 1  | -1.816316000 | 3.635607000  | 2.391798000  |
| 1  | -3.589133000 | 3.443511000  | 2.167555000  |
| 1  | -2.612495000 | 2.134484000  | 2.896490000  |
| 1  | -1.831593000 | 2.055437000  | -2.032493000 |
| 1  | -2.513581000 | 2.201858000  | -1.618105000 |

**II\_homo\_AcO\_q** (G = -2566.653324) (quartet)

|    |              |              |              |
|----|--------------|--------------|--------------|
| 26 | 0.289449000  | -0.607801000 | -0.517982000 |
| 6  | -1.443083000 | -2.868925000 | 0.525948000  |
| 1  | -0.547212000 | -3.119218000 | 1.079846000  |
| 7  | -1.383143000 | -1.761638000 | -0.237825000 |
| 7  | -1.285899000 | 0.738951000  | -1.239403000 |

|   |              |              |              |
|---|--------------|--------------|--------------|
| 6 | -2.590449000 | -3.648485000 | 0.600976000  |
| 7 | 0.081121000  | 0.486862000  | 1.236044000  |
| 7 | 1.872172000  | 0.617593000  | -0.735163000 |
| 8 | 0.507979000  | -1.501455000 | -2.064812000 |
| 6 | -3.713778000 | -3.263430000 | -0.132916000 |
| 6 | -3.648263000 | -2.115591000 | -0.920159000 |
| 1 | -4.498299000 | -1.773657000 | -1.500440000 |
| 6 | -2.460532000 | -1.390545000 | -0.961229000 |
| 6 | -2.289578000 | -0.172569000 | -1.830379000 |
| 1 | -1.913126000 | -0.489848000 | -2.807661000 |
| 1 | -3.248953000 | 0.335493000  | -1.978572000 |
| 6 | -0.753971000 | 1.647435000  | -2.280200000 |
| 1 | -0.214404000 | 1.041870000  | -3.011049000 |
| 1 | -0.070060000 | 2.365316000  | -1.825457000 |
| 6 | -1.838408000 | 1.445319000  | -0.034893000 |
| 6 | -0.686330000 | 1.764516000  | 0.918196000  |
| 6 | -0.551013000 | -0.297095000 | 2.331870000  |
| 1 | -0.050503000 | -1.263062000 | 2.391110000  |
| 1 | -1.608214000 | -0.439788000 | 2.111473000  |
| 6 | 1.477688000  | 0.837823000  | 1.638403000  |
| 1 | 1.922171000  | -0.038331000 | 2.117578000  |
| 1 | 1.475170000  | 1.651054000  | 2.369208000  |
| 6 | 2.266242000  | 1.215564000  | 0.418896000  |
| 6 | 3.323227000  | 2.116728000  | 0.446659000  |
| 1 | 3.601902000  | 2.580194000  | 1.386213000  |
| 6 | 3.989831000  | 2.413103000  | -0.741286000 |
| 6 | 3.564525000  | 1.818007000  | -1.930895000 |
| 6 | 2.497904000  | 0.932103000  | -1.891175000 |
| 1 | 2.120104000  | 0.468343000  | -2.793869000 |
| 8 | 1.473301000  | -2.010925000 | 0.672125000  |
| 1 | -4.628605000 | -3.845739000 | -0.088211000 |
| 1 | -2.597275000 | -4.532690000 | 1.228087000  |
| 1 | 4.818789000  | 3.113620000  | -0.742252000 |
| 1 | 4.042628000  | 2.038151000  | -2.878215000 |
| 1 | -0.439344000 | 0.225751000  | 3.285579000  |
| 1 | -1.562432000 | 2.185997000  | -2.785755000 |
| 6 | -2.650852000 | 2.701091000  | -0.379283000 |
| 6 | -3.146001000 | 3.400957000  | 0.891790000  |
| 6 | -1.954834000 | 3.766524000  | 1.784511000  |
| 6 | -1.179006000 | 2.500938000  | 2.171419000  |
| 1 | -1.293993000 | 4.458577000  | 1.245520000  |
| 1 | -2.293264000 | 4.273710000  | 2.694646000  |
| 1 | -3.714428000 | 4.296801000  | 0.618628000  |
| 1 | -3.822553000 | 2.734696000  | 1.443925000  |
| 1 | -2.015577000 | 3.401383000  | -0.932232000 |
| 1 | -3.485968000 | 2.420493000  | -1.029916000 |
| 1 | -0.328536000 | 2.744614000  | 2.816222000  |
| 1 | -1.852449000 | 1.847778000  | 2.735542000  |
| 1 | 0.017429000  | 2.414007000  | 0.388786000  |
| 1 | -2.501701000 | 0.733902000  | 0.466938000  |
| 6 | 2.634480000  | -2.386050000 | 0.862331000  |
| 8 | 3.645993000  | -2.014997000 | 0.091942000  |
| 6 | 3.015232000  | -3.273413000 | 2.000265000  |
| 1 | 2.284619000  | -4.083081000 | 2.079971000  |
| 1 | 4.024485000  | -3.671035000 | 1.883181000  |
| 1 | 2.960587000  | -2.679116000 | 2.920804000  |
| 1 | 1.374041000  | -1.376062000 | -2.484930000 |
| 1 | 3.333174000  | -1.434696000 | -0.629883000 |

**[Fe<sup>III</sup>(OO)(OCH<sub>3</sub>)(BPMCn)]<sup>2+</sup>** (G = -2565.379400) (doublet)

|    |              |              |              |
|----|--------------|--------------|--------------|
| 26 | -0.357177000 | -0.573198000 | 0.117778000  |
| 6  | 1.336482000  | -2.684653000 | -1.103747000 |
| 1  | 0.534282000  | -2.750302000 | -1.828098000 |
| 7  | 1.202018000  | -1.755751000 | -0.137350000 |
| 7  | 0.926498000  | 0.409791000  | 1.316850000  |
| 6  | 2.450567000  | -3.510393000 | -1.168228000 |
| 7  | 0.129839000  | 0.774792000  | -1.329865000 |
| 7  | -1.926986000 | 0.647864000  | 0.288198000  |
| 8  | -0.951982000 | -1.634411000 | 1.461969000  |
| 6  | 3.450319000  | -3.369991000 | -0.203557000 |
| 6  | 3.299251000  | -2.417999000 | 0.804050000  |
| 1  | 4.048643000  | -2.280801000 | 1.575346000  |
| 6  | 2.153313000  | -1.632725000 | 0.815640000  |
| 6  | 1.828464000  | -0.635972000 | 1.886749000  |
| 1  | 1.285443000  | -1.143261000 | 2.690747000  |
| 1  | 2.727739000  | -0.182636000 | 2.312300000  |
| 6  | 0.242243000  | 1.111395000  | 2.436370000  |
| 1  | -0.427842000 | 0.400329000  | 2.920360000  |
| 1  | -0.328330000 | 1.952961000  | 2.045310000  |
| 6  | 1.740937000  | 1.347744000  | 0.442143000  |
| 6  | 0.828142000  | 1.926196000  | -0.631458000 |
| 6  | 0.941210000  | 0.191076000  | -2.434260000 |
| 1  | 0.438398000  | -0.709799000 | -2.787201000 |
| 1  | 1.936918000  | -0.055334000 | -2.068881000 |

|   |              |              |              |
|---|--------------|--------------|--------------|
| 6 | -1.169869000 | 1.239318000  | -1.904284000 |
| 1 | -1.534444000 | 0.456948000  | -2.577111000 |
| 1 | -1.028415000 | 2.154983000  | -2.484814000 |
| 6 | -2.151581000 | 1.431528000  | -0.789659000 |
| 6 | -3.224885000 | 2.312332000  | -0.841573000 |
| 1 | -3.359486000 | 2.936190000  | -1.718031000 |
| 6 | -4.100884000 | 2.367428000  | 0.241597000  |
| 6 | -3.871055000 | 1.545379000  | 1.346279000  |
| 6 | -2.770266000 | 0.698792000  | 1.337174000  |
| 1 | -2.540830000 | 0.044523000  | 2.167963000  |
| 8 | -1.515186000 | -1.665731000 | -1.014539000 |
| 1 | 4.336175000  | -3.996123000 | -0.234785000 |
| 1 | 2.527412000  | -4.243690000 | -1.962655000 |
| 1 | -4.947995000 | 3.045682000  | 0.226203000  |
| 1 | -4.527527000 | 1.557559000  | 2.208677000  |
| 1 | 1.016183000  | 0.903790000  | -3.259627000 |
| 1 | 0.975744000  | 1.467630000  | 3.163941000  |
| 6 | 2.465934000  | 2.452623000  | 1.219445000  |
| 6 | 3.241371000  | 3.361383000  | 0.255865000  |
| 6 | 2.287316000  | 3.971425000  | -0.778026000 |
| 6 | 1.592787000  | 2.859610000  | -1.575730000 |
| 1 | 1.535362000  | 4.584457000  | -0.263451000 |
| 1 | 2.831886000  | 4.625428000  | -1.467552000 |
| 1 | 3.745871000  | 4.147462000  | 0.827962000  |
| 1 | 4.015314000  | 2.779231000  | -0.262086000 |
| 1 | 1.731634000  | 3.065004000  | 1.752949000  |
| 1 | 3.132244000  | 2.001561000  | 1.961566000  |
| 1 | 0.904160000  | 3.276916000  | -2.317261000 |
| 1 | 2.359765000  | 2.289606000  | -2.110302000 |
| 1 | 0.041384000  | 2.501447000  | -0.134485000 |
| 1 | 2.489753000  | 0.723099000  | -0.053613000 |
| 6 | -2.235884000 | -2.403117000 | -0.307038000 |
| 8 | -2.089059000 | -2.453379000 | 0.997307000  |
| 6 | -3.305095000 | -3.278327000 | -0.858393000 |
| 1 | -2.840923000 | -3.985835000 | -1.554401000 |
| 1 | -3.829444000 | -3.819073000 | -0.069050000 |
| 1 | -4.005137000 | -2.651822000 | -1.421036000 |

**I\_homo\_AcO\_d** (G = -2566.543376) (doublet)

|    |              |              |              |
|----|--------------|--------------|--------------|
| 26 | 0.380657000  | 0.583112000  | 0.224682000  |
| 6  | -1.304589000 | 2.704195000  | -1.001732000 |
| 1  | -0.480052000 | 2.805722000  | -1.694757000 |
| 7  | -1.192540000 | 1.742631000  | -0.065381000 |
| 7  | -0.962629000 | -0.500514000 | 1.291515000  |
| 6  | -2.428221000 | 3.516327000  | -1.070008000 |
| 7  | -0.065418000 | -0.747027000 | -1.341809000 |
| 7  | 1.925223000  | -0.684065000 | 0.373749000  |
| 8  | 0.876384000  | 1.452631000  | 1.514223000  |
| 6  | -3.457155000 | 3.327404000  | -0.145595000 |
| 6  | -3.328988000 | 2.336907000  | 0.827389000  |
| 1  | -4.103074000 | 2.156744000  | 1.564478000  |
| 6  | -2.174120000 | 1.565844000  | 0.848677000  |
| 6  | -1.882778000 | 0.521962000  | 1.882330000  |
| 1  | -1.365231000 | 0.983303000  | 2.728933000  |
| 1  | -2.794513000 | 0.043070000  | 2.248019000  |
| 6  | -0.320769000 | -1.268901000 | 2.394800000  |
| 1  | 0.322887000  | -0.589545000 | 2.952281000  |
| 1  | 0.263084000  | -2.087673000 | 1.976856000  |
| 6  | -1.748291000 | -1.387785000 | 0.333678000  |
| 6  | -0.797210000 | -1.921730000 | -0.725617000 |
| 6  | -0.823449000 | -0.107029000 | -2.450504000 |
| 1  | -0.300172000 | 0.805729000  | -2.735945000 |
| 1  | -1.834535000 | 0.126716000  | -2.119639000 |
| 6  | 1.252855000  | -1.204215000 | -1.872361000 |
| 1  | 1.651455000  | -0.411295000 | -2.511345000 |
| 1  | 1.130172000  | -2.107605000 | -2.475661000 |
| 6  | 2.185582000  | -1.428858000 | -0.723151000 |
| 6  | 3.262534000  | -2.306526000 | -0.764705000 |
| 1  | 3.428130000  | -2.899744000 | -1.656955000 |
| 6  | 4.101085000  | -2.397082000 | 0.344577000  |
| 6  | 3.834619000  | -1.609408000 | 1.466017000  |
| 6  | 2.735917000  | -0.761214000 | 1.446561000  |
| 1  | 2.482977000  | -0.126953000 | 2.286038000  |
| 8  | 1.432741000  | 1.581943000  | -1.006282000 |
| 1  | -4.349341000 | 3.943965000  | -0.182304000 |
| 1  | -2.488059000 | 4.278175000  | -1.838541000 |
| 1  | 4.948995000  | -3.074382000 | 0.335536000  |
| 1  | 4.462514000  | -1.646664000 | 2.348638000  |
| 1  | -0.865478000 | -0.779052000 | -3.311683000 |
| 1  | -1.090727000 | -1.664661000 | 3.061183000  |
| 6  | -2.506619000 | -2.522358000 | 1.033935000  |
| 6  | -3.253936000 | -3.372499000 | -0.002989000 |
| 6  | -2.267450000 | -3.942457000 | -1.028174000 |
| 6  | -1.532186000 | -2.801884000 | -1.744248000 |
| 1  | -1.541686000 | -4.587967000 | -0.515936000 |

|   |              |              |              |
|---|--------------|--------------|--------------|
| 1 | -2.791488000 | -4.555467000 | -1.769185000 |
| 1 | -3.786023000 | -4.179170000 | 0.512523000  |
| 1 | -4.002733000 | -2.757014000 | -0.518868000 |
| 1 | -1.794540000 | -3.167561000 | 1.557897000  |
| 1 | -3.196232000 | -2.105251000 | 1.774213000  |
| 1 | -0.817604000 | -3.192064000 | -2.475829000 |
| 1 | -2.270859000 | -2.197947000 | -2.281280000 |
| 1 | -0.037325000 | -2.529950000 | -0.226351000 |
| 1 | -2.475598000 | -0.733891000 | -0.155204000 |
| 6 | 2.175450000  | 2.513500000  | -0.517447000 |
| 8 | 2.223143000  | 2.802552000  | 0.702511000  |
| 6 | 3.030945000  | 3.282331000  | -1.489144000 |
| 1 | 2.384435000  | 3.688965000  | -2.273357000 |
| 1 | 3.572230000  | 4.084908000  | -0.986412000 |
| 1 | 3.735532000  | 2.580528000  | -1.948464000 |
| 1 | 0.677674000  | 1.472911000  | 4.744195000  |
| 1 | 0.718153000  | 1.468910000  | 4.001329000  |

**TS\_homo\_AcO\_d** (G = -2566.512473) (doublet)

|    |              |              |              |
|----|--------------|--------------|--------------|
| 26 | -0.238611000 | 0.695526000  | -0.454776000 |
| 6  | 1.658228000  | 2.694547000  | 0.675394000  |
| 1  | 0.801090000  | 2.991481000  | 1.264194000  |
| 7  | 1.478034000  | 1.653882000  | -0.160134000 |
| 7  | 1.046706000  | -0.701090000 | -1.277694000 |
| 6  | 2.885268000  | 3.337081000  | 0.769170000  |
| 7  | -0.067275000 | -0.506897000 | 1.268447000  |
| 7  | -1.895686000 | -0.401230000 | -0.611721000 |
| 8  | -0.406551000 | 1.375145000  | -1.979032000 |
| 6  | 3.945582000  | 2.893404000  | -0.022694000 |
| 6  | 3.746276000  | 1.823474000  | -0.894588000 |
| 1  | 4.540528000  | 1.445550000  | -1.528160000 |
| 6  | 2.492710000  | 1.229255000  | -0.949570000 |
| 6  | 2.138751000  | 0.118405000  | -1.889442000 |
| 1  | 1.762809000  | 0.536066000  | -2.829535000 |
| 1  | 3.001528000  | -0.513290000 | -2.114366000 |
| 6  | 0.390476000  | -1.515905000 | -2.336624000 |
| 1  | -0.118132000 | -0.838453000 | -3.021856000 |
| 1  | -0.323124000 | -2.199901000 | -1.880152000 |
| 6  | 1.638928000  | -1.548022000 | -0.159531000 |
| 6  | 0.551370000  | -1.829564000 | 0.857933000  |
| 6  | 0.677905000  | 0.169513000  | 2.365248000  |
| 1  | 0.251373000  | 1.163336000  | 2.496134000  |
| 1  | 1.733721000  | 0.240046000  | 2.108043000  |
| 6  | -1.469507000 | -0.747646000 | 1.725753000  |
| 1  | -1.813806000 | 0.138099000  | 2.263777000  |
| 1  | -1.495713000 | -1.593401000 | 2.417613000  |
| 6  | -2.328468000 | -0.989871000 | 0.525704000  |
| 6  | -3.495636000 | -1.743221000 | 0.551286000  |
| 1  | -3.801239000 | -2.213579000 | 1.478906000  |
| 6  | -4.237810000 | -1.875428000 | -0.620529000 |
| 6  | -3.785450000 | -1.256528000 | -1.786693000 |
| 6  | -2.608653000 | -0.523084000 | -1.747638000 |
| 1  | -2.219329000 | -0.017679000 | -2.620500000 |
| 8  | -1.094895000 | 1.959331000  | 0.616571000  |
| 1  | 4.916535000  | 3.373937000  | 0.038446000  |
| 1  | 2.998227000  | 4.167382000  | 1.456369000  |
| 1  | -5.153322000 | -2.457789000 | -0.625401000 |
| 1  | -4.330343000 | -1.334753000 | -2.720182000 |
| 1  | 0.560316000  | -0.400021000 | 3.290703000  |
| 1  | 1.149264000  | -2.079349000 | -2.884510000 |
| 6  | 2.298899000  | -2.842807000 | -0.655044000 |
| 6  | 2.843201000  | -3.642463000 | 0.536971000  |
| 6  | 1.713946000  | -3.955505000 | 1.524851000  |
| 6  | 1.086348000  | -2.652133000 | 2.036679000  |
| 1  | 0.949094000  | -4.565054000 | 1.025699000  |
| 1  | 2.093696000  | -4.530342000 | 2.376058000  |
| 1  | 3.301474000  | -4.565509000 | 0.166483000  |
| 1  | 3.624828000  | -3.064017000 | 1.047037000  |
| 1  | 1.554586000  | -3.456849000 | -1.170776000 |
| 1  | 3.094442000  | -2.600122000 | -1.365798000 |
| 1  | 0.275438000  | -2.854699000 | 2.743143000  |
| 1  | 1.858474000  | -2.080048000 | 2.560342000  |
| 1  | -0.240169000 | -2.402879000 | 0.367682000  |
| 1  | 2.403725000  | -0.930309000 | 0.318180000  |
| 6  | -2.362651000 | 2.301193000  | 0.784696000  |
| 8  | -3.251177000 | 2.161061000  | -0.052550000 |
| 6  | -2.608062000 | 2.942590000  | 2.130338000  |
| 1  | -2.030731000 | 3.872989000  | 2.188804000  |
| 1  | -3.670807000 | 3.160315000  | 2.253591000  |
| 1  | -2.257191000 | 2.284424000  | 2.932103000  |
| 1  | -1.767864000 | 2.288848000  | -2.210987000 |
| 1  | -2.386872000 | 2.351263000  | -1.739121000 |

**H<sub>2</sub>** (G = -2566.658852) (doublet)

|    |              |              |              |
|----|--------------|--------------|--------------|
| 26 | 0.234991000  | -0.610036000 | -0.434992000 |
| 6  | -1.553879000 | -2.746050000 | 0.654499000  |
| 1  | -0.696576000 | -2.998120000 | 1.264574000  |
| 7  | -1.415194000 | -1.687172000 | -0.165203000 |
| 7  | -1.093008000 | 0.673616000  | -1.249191000 |
| 6  | -2.735433000 | -3.474242000 | 0.718358000  |
| 7  | 0.064745000  | 0.530982000  | 1.284622000  |
| 7  | 1.883109000  | 0.506707000  | -0.616818000 |
| 8  | 0.456097000  | -1.412645000 | -2.047190000 |
| 6  | -3.807566000 | -3.093609000 | -0.090206000 |
| 6  | -3.659414000 | -2.000843000 | -0.943131000 |
| 1  | -4.464798000 | -1.666952000 | -1.587829000 |
| 6  | -2.444070000 | -1.326103000 | -0.963003000 |
| 6  | -2.145065000 | -0.178537000 | -1.877850000 |
| 1  | -1.736472000 | -0.565594000 | -2.814359000 |
| 1  | -3.038553000 | 0.411481000  | -2.098909000 |
| 6  | -0.480203000 | 1.523533000  | -2.303908000 |
| 1  | 0.055450000  | 0.863674000  | -2.985004000 |
| 1  | 0.208595000  | 2.233022000  | -1.846336000 |
| 6  | -1.711467000 | 1.487000000  | -0.126562000 |
| 6  | -0.624521000 | 1.819810000  | 0.885573000  |
| 6  | -0.640018000 | -0.178472000 | 2.385422000  |
| 1  | -0.175454000 | -1.156568000 | 2.511323000  |
| 1  | -1.691826000 | -0.299538000 | 2.129050000  |
| 6  | 1.457660000  | 0.828506000  | 1.726954000  |
| 1  | 1.846112000  | -0.053320000 | 2.245259000  |
| 1  | 1.472688000  | 1.664695000  | 2.431836000  |
| 6  | 2.295672000  | 1.119509000  | 0.517852000  |
| 6  | 3.414057000  | 1.945451000  | 0.538492000  |
| 1  | 3.700707000  | 2.427577000  | 1.466370000  |
| 6  | 4.134367000  | 2.136597000  | -0.639094000 |
| 6  | 3.703519000  | 1.507608000  | -1.808818000 |
| 6  | 2.569197000  | 0.708627000  | -1.762107000 |
| 1  | 2.183347000  | 0.207457000  | -2.640756000 |
| 8  | 1.278770000  | -1.927759000 | 0.609465000  |
| 1  | -4.745703000 | -3.638154000 | -0.055139000 |
| 1  | -2.806726000 | -4.318167000 | 1.394907000  |
| 1  | 5.012050000  | 2.774778000  | -0.647052000 |
| 1  | 4.228616000  | 1.635123000  | -2.748367000 |
| 1  | -0.550893000 | 0.384615000  | 3.318615000  |
| 1  | -1.257112000 | 2.063123000  | -2.851541000 |
| 6  | -2.443825000 | 2.749344000  | -0.600187000 |
| 6  | -3.011093000 | 3.521838000  | 0.598511000  |
| 6  | -1.883723000 | 3.891121000  | 1.570011000  |
| 6  | -1.182214000 | 2.620923000  | 2.067656000  |
| 1  | -1.159502000 | 4.539137000  | 1.058223000  |
| 1  | -2.278509000 | 4.447841000  | 2.426792000  |
| 1  | -3.522488000 | 4.421271000  | 0.238773000  |
| 1  | -3.754192000 | 2.904423000  | 1.121022000  |
| 1  | -1.739703000 | 3.401955000  | -1.125856000 |
| 1  | -3.236079000 | 2.472827000  | -1.302947000 |
| 1  | -0.371582000 | 2.863805000  | 2.762395000  |
| 1  | -1.915998000 | 2.012422000  | 2.605618000  |
| 1  | 0.131316000  | 2.430912000  | 0.382627000  |
| 1  | -2.435618000 | 0.828284000  | 0.361174000  |
| 6  | 2.414835000  | -2.396082000 | 0.774102000  |
| 8  | 3.429778000  | -2.157859000 | -0.033802000 |
| 6  | 2.727037000  | -3.274634000 | 1.936447000  |
| 1  | 1.979670000  | -4.072461000 | 1.986177000  |
| 1  | 3.731956000  | -3.692404000 | 1.865299000  |
| 1  | 2.635872000  | -2.673381000 | 2.848815000  |
| 1  | 1.355148000  | -1.748333000 | -2.187846000 |
| 1  | 3.168656000  | -1.575075000 | -0.772845000 |

**H<sub>2</sub>** (G = -1.180942) (singlet)

|   |             |             |              |
|---|-------------|-------------|--------------|
| 1 | 0.000000000 | 0.000000000 | 0.371752000  |
| 1 | 0.000000000 | 0.000000000 | -0.371752000 |

**H<sub>2</sub>O** (G = -76.464043) (singlet)

|   |             |              |              |
|---|-------------|--------------|--------------|
| 8 | 0.000000000 | 0.000000000  | 0.120388000  |
| 1 | 0.000000000 | 0.757559000  | -0.481551000 |
| 1 | 0.000000000 | -0.757559000 | -0.481551000 |

**CH<sub>3</sub>CN** (G = -132.797503) (singlet)

|   |             |             |              |
|---|-------------|-------------|--------------|
| 6 | 0.000000000 | 0.000000000 | -1.180293000 |
| 1 | 0.000000000 | 1.030352000 | -1.551272000 |

|   |              |              |              |
|---|--------------|--------------|--------------|
| 1 | 0.892311000  | -0.515176000 | -1.551272000 |
| 1 | -0.892311000 | -0.515176000 | -1.551272000 |
| 6 | 0.000000000  | 0.000000000  | 0.277406000  |
| 7 | 0.000000000  | 0.000000000  | 1.438735000  |

**AcOH** (G = -229.160637) (singlet)

|   |              |              |              |
|---|--------------|--------------|--------------|
| 6 | -0.474791000 | 0.519312000  | 0.056040000  |
| 8 | 0.706750000  | 0.459885000  | 0.332936000  |
| 8 | -1.100852000 | 1.686135000  | -0.217914000 |
| 1 | -0.437405000 | 2.397464000  | -0.142477000 |
| 6 | -1.421770000 | -0.646803000 | -0.025526000 |
| 1 | -2.240567000 | -0.506779000 | 0.689666000  |
| 1 | -1.862286000 | -0.697403000 | -1.027280000 |
| 1 | -0.887461000 | -1.572186000 | 0.194834000  |

## References

- [1] M. Costas, J. Que, L., *Angew Chem. Int. Ed.* **2002**, *41*, 2179-2181
- [2] Gaussian 09, Revision C.01, Frisch, M. J.; Trucks, G. W.; Schlegel, H. B.; Scuseria, G. E.; Robb, M. A.; Cheeseman, J. R.; Scalmani, G.; Barone, V.; Mennucci, B.; Petersson, G. A.; Nakatsuji, H.; Caricato, M.; Li, X.; Hratchian, H. P.; Izmaylov, A. F.; Bloino, J.; Zheng, G.; Sonnenberg, J. L.; Hada, M.; Ehara, M.; Toyota, K.; Fukuda, R.; Hasegawa, J.; Ishida, M.; Nakajima, T.; Honda, Y.; Kitao, O.; Nakai, H.; Vreven, T.; Montgomery, Jr., J. A.; Peralta, J. E.; Ogliaro, F.; Bearpark, M.; Heyd, J. J.; Brothers, E.; Kudin, K. N.; Staroverov, V. N.; Kobayashi, R.; Normand, J.; Raghavachari, K.; Rendell, A.; Burant, J. C.; Iyengar, S. S.; Tomasi, J.; Cossi, M.; Rega, N.; Millam, J. M.; Klene, M.; Knox, J. E.; Cross, J. B.; Bakken, V.; Adamo, C.; Jaramillo, J.; Gomperts, R.; Stratmann, R. E.; Yazyev, O.; Austin, A. J.; Cammi, R.; Pomelli, C.; Ochterski, J. W.; Martin, R. L.; Morokuma, K.; Zakrzewski, V. G.; Voth, G. A.; Salvador, P.; Dannenberg, J. J.; Dapprich, S.; Daniels, A. D.; Farkas, Ö.; Foresman, J. B.; Ortiz, J. V.; Cioslowski, J.; Fox, D. J. Gaussian, Inc., Wallingford CT, **2009**.
- [3] a) Becke, A. D. *J. Chem. Phys.* **1993**, *98*, 1372-1377; b) Becke, A. D. *J. Chem. Phys.* **1993**, *98*, 5648-5562.
- [4] Marenich, A. V.; Cramer, C. J.; Truhlar, D. G. *J. Phys. Chem. B.* **2009**, *113*, 6378-6396.
- [5] Schwabe, T.; Grimme, S. *Phys. Chem. Chem. Phys.* **2007**, *9*, 3397-3406.
- [6] Swart, M.; Güell, M.; Luis, J.M.; Solà M.; *J. Phys. Chem. A* **2010**, *114*, 7191-7197.
- [7] Fukui, K. *Acc. Chem. Res.*, **1981**, *14*, 363-368.
